# Supplementary material for: Synthesis, structure, and alkyne insertion of a mixed-sandwich zirconacarborane alkyl
Source: Royal Society of Chemistry journal article supplement (doi:10.1039/c4qi00244j), 2015-01-01

## Supporting Information

# Synthesis, Structure, and Alkyne Insertion of Mixed-Sandwich Zirconacarborane Alkyl

Dongmei Liu,<sup>a</sup> Zaozao Qiu,<sup>b</sup> and Zuowei Xie<sup>\*a,b</sup>

<sup>a</sup> *Department of Chemistry, Center of Novel Functional Materials and State Key Laboratory of Synthetic Chemistry, The Chinese University of Hong Kong, Shatin, New Territories, Hong Kong, China*

<sup>b</sup> *Shanghai-Hong Kong Joint Laboratory in Chemical Synthesis, Shanghai Institute of Organic Chemistry, Chinese Academy of Sciences, 345 Lingling Road, Shanghai 200032, China*

**General Procedures.** All experiments were performed under an atmosphere of dry dinitrogen with the rigid exclusion of air and moisture using standard Schlenk or cannula techniques, or in a glovebox. Ether and toluene were refluxed over sodium benzophenone ketyl for several days and freshly distilled prior to use. 7-Me<sub>2</sub>N(H)CH<sub>2</sub>CH<sub>2</sub>-7,8-C<sub>2</sub>B<sub>9</sub>H<sub>11</sub>,<sup>1</sup> Cp''ZrMe<sub>3</sub>,<sup>2</sup> PhC≡CMe,<sup>3</sup> PhC≡CTMS,<sup>4</sup> <sup>n</sup>BuC≡CTMS<sup>5</sup> were prepared according to literature methods. Other chemicals were purchased from either Aldrich or Acros Chemical Co. and used as received unless otherwise specified. <sup>1</sup>H and <sup>13</sup>C NMR spectra were recorded on a Bruker DPX 300 spectrometer at 300 and 75 MHz, respectively. <sup>11</sup>B NMR spectra were recorded on a Varian Inova 400 spectrometer at 128 MHz. All chemical shifts were reported in δ units with references to the residual protons of the deuterated solvents for proton and carbon chemical shifts and to external BF<sub>3</sub>·OEt<sub>2</sub> (0.00 ppm) for boron chemical shifts. Infrared spectra were obtained from KBr pellets prepared in the glovebox on

a Perkin-Elmer 1600 Fourier transform spectrometer. Elemental analyses were performed by the Shanghai Institute of Organic Chemistry, CAS, China.

**Preparation of  $[\eta^1:\sigma:\eta^5\text{-}\{\text{MeN}(\text{CH}_2\text{CH}_2\text{CH}_2)\text{C}_2\text{B}_9\text{H}_{10}\}\text{Zr}(\eta^5\text{-Cp}'')]$  (1).** To an Et<sub>2</sub>O (25 mL) suspension of Cp''ZrCl<sub>3</sub> (2.04 g, 5.0 mmol) was added an Et<sub>2</sub>O solution of MeLi (1.4 M, 10.7 mL, 15.0 mmol) at -78 °C with stirring. The reaction mixture was allowed to slowly warm to -20 °C, and stirred for 2 h. Removal of the solvent under vacuum gave a pale-yellow residue which was extracted with hexane (50 mL). After filtration, the filtrate was concentrated to dryness, affording Cp''ZrMe<sub>3</sub> as a yellow crystalline solid (1.21 g, 3.5 mmol).<sup>2</sup> A white solid of 7-Me<sub>2</sub>N(H)CH<sub>2</sub>CH<sub>2</sub>-7,8-C<sub>2</sub>B<sub>9</sub>H<sub>11</sub> (0.72 g, 3.5 mmol) was added to a toluene solution (15 mL) of Cp''ZrMe<sub>3</sub> (1.21 g, 3.5 mmol) in portions at -30 °C with stirring. The resultant orange suspension was allowed to warm to room temperature, and stirred overnight. After filtration, the orange filtrate was concentrated to *ca.* 10 mL. Complex **1** was isolated as orange crystals after this solution stood at room temperature for 2 days (1.41 g, 56%). <sup>1</sup>H NMR (benzene-*d*<sub>6</sub>): δ 7.68 (s, 1H), 7.11 (m, 1H), 6.28 (m, 1H) [C<sub>5</sub>H<sub>3</sub>(TMS)<sub>2</sub>], 3.15 (br s, 1H) (cage CH), 2.21 (m, 2H) (CH<sub>2</sub>CH<sub>2</sub>NMe), 2.08 (s, 3H) (NCH<sub>3</sub>), 2.01 (m, 2H) (CH<sub>2</sub>CH<sub>2</sub>NMe), 2.21 (d, *J* = 6.0 Hz, 1H), 2.19 (d, *J* = 6.0 Hz, 1H) (Zr-CH<sub>2</sub>), 0.28 (s, 9H), -0.04 (s, 9H) [Si(CH<sub>3</sub>)<sub>3</sub>]. <sup>13</sup>C{<sup>1</sup>H} NMR (benzene-*d*<sub>6</sub>): δ 132.4, 131.5, 130.7, 129.7, 124.2 [C<sub>5</sub>H<sub>3</sub>(TMS)<sub>2</sub>], 73.2 (Zr-CH<sub>2</sub>), 68.2 (CH<sub>2</sub>CH<sub>2</sub>NMe), 63.7 (cage C), 54.4 (NCH<sub>3</sub>), 38.3 (CH<sub>2</sub>CH<sub>2</sub>NMe), 1.1, -0.2 [Si(CH<sub>3</sub>)<sub>3</sub>]. <sup>11</sup>B{<sup>1</sup>H} NMR (benzene-*d*<sub>6</sub>): δ 2.1 (1B), 0.9 (1B), -2.2 (2B), -4.9 (1B), -7.9 (2B), -13.9 (1B), -18.1 (1B). IR (KBr, cm<sup>-1</sup>): ν<sub>BH</sub> 2545 (vs). Anal. Calcd for C<sub>17</sub>H<sub>40</sub>B<sub>9</sub>NSi<sub>2</sub>Zr (**1**): C, 40.58; H, 8.01; N, 2.78. Found: C, 40.73; H, 8.08; N, 2.81.

**Preparation of  $[\eta^1:\sigma:\eta^5\text{-}\{\text{MeN}[\text{CH}_2(\text{Et})\text{C}=\text{C}(\text{Et})\text{CH}_2\text{CH}_2]\text{C}_2\text{B}_9\text{H}_{10}\}\text{Zr}(\eta^5\text{-Cp}'')]$  (2a).** To a toluene (5 mL) solution of **1** (101 mg, 0.2 mmol) was added 3-hexyne (16 mg, 0.2 mmol) at room temperature, and the reaction mixture was stirred at room temperature overnight. After filtration,

the orange filtrate was concentrated to *ca.* 2 mL. Complex **2a** was isolated as orange crystals after this solution stood at room temperature for 3 days (85 g, 73%).  $^1\text{H}$  NMR (benzene- $d_6$ ):  $\delta$  7.94 (s, 1H), 7.11 (m, 1H), 6.20 (m, 1H) [ $\text{C}_5\text{H}_3(\text{TMS})_2$ ], 4.44 (br s, 1H) (cage CH), 3.10 (d,  $J = 15.0$  Hz, 1H), 2.09 (d,  $J = 15.0$  Hz, 1H) (MeNCH<sub>2</sub>CEt), 3.00 (m, 1H), 2.12 (m, 1H) (CH<sub>2</sub>CH<sub>2</sub>NMe), 2.35 (m, 1H), 1.83 (m, 1H), 1.76 (m, 2H) (CH<sub>2</sub>CH<sub>3</sub>), 1.45 (s, 3H) (NCH<sub>3</sub>), 1.42 (m, 2H) (CH<sub>2</sub>CH<sub>2</sub>NMe), 0.98 (t,  $J = 7.5$  Hz, 3H), 0.87 (t,  $J = 7.5$  Hz, 3H) (CH<sub>2</sub>CH<sub>3</sub>), 0.25 (s, 9H), 0.23 (s, 9H) [Si(CH<sub>3</sub>)<sub>3</sub>].  $^{13}\text{C}\{^1\text{H}\}$  NMR (benzene- $d_6$ ):  $\delta$  193.1 (Zr-C <sub>$\alpha$</sub> ), 138.4 (Zr-C <sub>$\alpha$</sub> C <sub>$\beta$</sub> ), 137.8, 131.7, 130.9, 129.7, 121.6 [ $\text{C}_5\text{H}_3(\text{TMS})_2$ ], 88.0, 86.2 (cage C), 67.8 (MeNCH<sub>2</sub>CEt), 64.5 (CH<sub>2</sub>CH<sub>2</sub>NMe), 46.8 (NCH<sub>3</sub>), 37.2 (CH<sub>2</sub>CH<sub>2</sub>NMe), 30.4, 25.1 (CH<sub>2</sub>CH<sub>3</sub>), 15.8, 13.3 (CH<sub>2</sub>CH<sub>3</sub>), 1.1, 1.0 [Si(CH<sub>3</sub>)<sub>3</sub>].  $^{11}\text{B}\{^1\text{H}\}$  NMR (benzene- $d_6$ ):  $\delta$  2.4 (1B), 0.9 (1B), -1.6 (2B), -3.3 (1B), -5.2 (1B), -8.5 (1B), -12.5 (1B), -16.4 (1B). IR (KBr, cm<sup>-1</sup>):  $\nu_{\text{BH}}$  2545 (vs). Anal. Calcd for C<sub>23</sub>H<sub>50</sub>B<sub>9</sub>NSi<sub>2</sub>Zr (**2a**): C, 47.20; H, 8.61; N, 2.39. Found: C, 47.24; H, 8.36; N, 2.53.

**Preparation of [ $\eta^1:\sigma:\eta^5$ -(MeN[CH<sub>2</sub>(<sup>*n*</sup>Pr)C=C(<sup>*n*</sup>Pr)]CH<sub>2</sub>CH<sub>2</sub>)C<sub>2</sub>B<sub>9</sub>H<sub>10</sub>]Zr( $\eta^5$ -Cp<sup>''</sup>) (**2b**).**

This complex was prepared as orange crystals from **1** (101 mg, 0.2 mmol) and 4-octyne (22 mg, 0.2 mmol) in toluene (10 mL), using the same procedure reported for **2a**: yield 89 mg (73%).  $^1\text{H}$  NMR (benzene- $d_6$ ):  $\delta$  7.96 (s, 1H), 7.24 (m, 1H), 6.33 (m, 1H) [ $\text{C}_5\text{H}_3(\text{TMS})_2$ ], 4.40 (br s, 1H) (cage CH), 3.23 (d,  $J = 15.3$  Hz, 1H), 2.15 (d,  $J = 15.3$  Hz, 1H) (MeNCH<sub>2</sub>C<sup>*n*</sup>Pr), 3.12 (m, 1H), 2.36 (m, 1H) (CH<sub>2</sub>CH<sub>2</sub>NMe), 2.07 (m, 2H) (CH<sub>2</sub>CH<sub>2</sub>NMe), 1.91 (m, 2H), 1.69 (m, 2H) (CH<sub>2</sub>CH<sub>2</sub>CH<sub>3</sub>), 1.60 (s, 3H) (NCH<sub>3</sub>), 1.46 (m, 4H) (CH<sub>2</sub>CH<sub>2</sub>CH<sub>3</sub>), 0.94 (t,  $J = 7.2$  Hz, 3H), 0.92 (t,  $J = 7.2$  Hz, 3H) (CH<sub>2</sub>CH<sub>2</sub>CH<sub>3</sub>), 0.28 (s, 9H), 0.24 (s, 9H) [Si(CH<sub>3</sub>)<sub>3</sub>].  $^{13}\text{C}\{^1\text{H}\}$  NMR (benzene- $d_6$ ):  $\delta$  192.1 (Zr-C <sub>$\alpha$</sub> ), 137.7 (Zr-C <sub>$\alpha$</sub> C <sub>$\beta$</sub> ), 137.3, 131.2, 130.5, 121.1 [ $\text{C}_5\text{H}_3(\text{TMS})_2$ ], 74.2 (cage C), 68.0 (MeNCH<sub>2</sub>C<sup>*n*</sup>Pr), 64.1 (CH<sub>2</sub>CH<sub>2</sub>NMe), 46.3 (NCH<sub>3</sub>), 40.2 (CH<sub>2</sub>CH<sub>2</sub>NMe), 36.8, 34.3 (CH<sub>2</sub>CH<sub>2</sub>CH<sub>3</sub>), 24.1, 21.9 (CH<sub>2</sub>CH<sub>2</sub>CH<sub>3</sub>), 15.4, 14.7 (CH<sub>2</sub>CH<sub>2</sub>CH<sub>3</sub>), 0.8, 0.7 [Si(CH<sub>3</sub>)<sub>3</sub>].  $^{11}\text{B}\{^1\text{H}\}$  NMR (benzene- $d_6$ ):  $\delta$  2.8

(1B), 1.0 (1B), -1.6 (2B), -3.3 (1B), -5.7 (1B), -9.5 (1B), -12.3 (1B), -16.5 (1B). IR (KBr,  $\text{cm}^{-1}$ ):  $\nu_{\text{BH}}$  2543 (vs). Anal. Calcd for  $\text{C}_{25}\text{H}_{54}\text{B}_9\text{NSi}_2\text{Zr}$  (**2b**): C, 48.95; H, 8.87; N, 2.28. Found: C, 48.51; H, 8.56; N, 2.35.

**Preparation of  $[\eta^1:\sigma:\eta^5\text{-}\{\text{MeN}[\text{CH}_2(\text{Ph})\text{C}=\text{C}(\text{Ph})]\text{CH}_2\text{CH}_2\}\text{C}_2\text{B}_9\text{H}_{10}]\text{Zr}(\eta^5\text{-Cp}'')$  (**2c**).** To a toluene (5 mL) solution of **1** (101 mg, 0.2 mmol) was added diphenylacetylene (36 mg, 0.2 mmol) at room temperature, and the reaction mixture was heated to 70 °C overnight. After filtration, the orange filtrate was concentrated to *ca.* 2 mL. Complex **2c** was collected as orange crystals after this solution stood at room temperature for 4 days (108 mg, 70%).  $^1\text{H}$  NMR (benzene- $d_6$ ): 8.21 (s, 1H), 7.54 (m, 1H), 6.61 (m, 1H) [ $\text{C}_5\text{H}_3(\text{TMS})_2$ ], 7.00 (m, 5H), 6.92 (m, 3H), 6.78 (m, 2H) ( $\text{C}_6\text{H}_5$ ), 4.67 (br s, 1H) (cage CH), 3.68 (d,  $J = 15.0$  Hz, 1H), 2.62 (d,  $J = 15.0$  Hz, 1H) [ $\text{C}(\text{Ph})\text{CH}_2\text{NMe}$ ], 3.38 (m, 1H), 2.15 (m, 1H) ( $\text{CH}_2\text{CH}_2\text{NMe}$ ), 1.73 (m, 2H) ( $\text{CH}_2\text{CH}_2\text{NMe}$ ), 1.54 (s, 3H) ( $\text{NCH}_3$ ), 0.19 (s, 9H), 0.04 (s, 9H) [ $\text{Si}(\text{CH}_3)_3$ ].  $^{13}\text{C}\{^1\text{H}\}$  NMR (benzene- $d_6$ ):  $\delta$  194.5 (Zr- $\text{C}_\alpha$ ), 149.7 (Zr- $\text{C}_\alpha\text{C}_\beta$ ), 141.7, 140.2, 138.4, 131.7, 130.7, 129.4, 129.3, 127.7, 126.5, 125.6, 125.0, 122.6 [ $\text{C}_6\text{H}_5 + \text{C}_5\text{H}_3(\text{TMS})_2$ ], 89.8 (cage C), 69.3 [ $\text{C}(\text{Ph})\text{CH}_2\text{NMe}$ ], 64.1 ( $\text{CH}_2\text{CH}_2\text{NMe}$ ), 46.2 ( $\text{NCH}_3$ ), 36.5 ( $\text{CH}_2\text{CH}_2\text{NMe}$ ), 0.9, 0.6 [ $\text{Si}(\text{CH}_3)_3$ ].  $^{11}\text{B}\{^1\text{H}\}$  NMR (benzene- $d_6$ ):  $\delta$  5.2 (1B), -0.2 (2B), -1.6 (2B), -11.2 (2B), -14.1 (2B). IR (KBr,  $\text{cm}^{-1}$ ):  $\nu_{\text{BH}}$  2544 (vs). Anal. Calcd for  $\text{C}_{34.5}\text{H}_{54}\text{B}_9\text{NSi}_2\text{Zr}$  (**2c** + 0.5 toluene): C, 56.96; H, 7.48; N, 1.93. Found: C, 57.16; H, 7.54; N, 2.26.

**Preparation of  $[\eta^1:\sigma:\eta^5\text{-}\{\text{MeN}[\text{CH}_2(\text{Ph})\text{C}=\text{C}(\text{Me})]\text{CH}_2\text{CH}_2\}\text{C}_2\text{B}_9\text{H}_{10}]\text{Zr}(\eta^5\text{-Cp}'')$  (**2d**).** This complex was prepared as orange crystals from **1** (101 mg, 0.2 mmol) and phenylmethylacetylene (23 mg, 0.2 mmol) in toluene (10 mL), using the same procedure reported for **2c**: yield 100 mg (81%).  $^1\text{H}$  NMR (benzene- $d_6$ ):  $\delta$  7.89 (s, 1H), 7.19 (m, 1H), 6.26 (m, 1H) [ $\text{C}_5\text{H}_3(\text{TMS})_2$ ], 7.25 (m, 3H), 6.91 (m, 2H) ( $\text{C}_6\text{H}_5$ ), 3.98 (br s, 1H) (cage CH), 3.42 (d,  $J = 15.6$  Hz, 1H), 2.44 (d,  $J = 15.6$  Hz, 1H) [ $\text{MeNCH}_2\text{C}(\text{Ph})$ ], 3.18 (m, 2H) ( $\text{CH}_2\text{CH}_2\text{NMe}$ ), 2.19 (m, 2H)

(CH<sub>2</sub>CH<sub>2</sub>NMe), 1.75 (s, 3H) (NCH<sub>3</sub>), 1.47 (s, 3H) [ZrC(CH<sub>3</sub>)], 0.28 (s, 9H), 0.22 (s, 9H) [Si(CH<sub>3</sub>)<sub>3</sub>]. <sup>13</sup>C{<sup>1</sup>H} NMR (benzene-*d*<sub>6</sub>): δ 191.4 (Zr-C<sub>α</sub>), 141.5 (Zr-C<sub>α</sub>C<sub>β</sub>), 137.0, 136.5, 132.4, 130.5, 127.2, 122.3 [C<sub>6</sub>H<sub>5</sub> + C<sub>5</sub>H<sub>3</sub>(TMS)<sub>2</sub>], 69.7 (PhCCH<sub>2</sub>NMe), 64.4 (CH<sub>2</sub>CH<sub>2</sub>NMe), 46.4 (NCH<sub>3</sub>), 37.5 (CH<sub>2</sub>CH<sub>2</sub>NMe), 25.4 [ZrC(CH<sub>3</sub>)], 0.9, 0.7 [Si(CH<sub>3</sub>)<sub>3</sub>], cage carbons were not observed. <sup>11</sup>B{<sup>1</sup>H} NMR (benzene-*d*<sub>6</sub>): δ 2.3 (1B), 0.1 (1B), -1.5 (2B), -3.3 (1B), -5.8 (1B), -9.9 (1B), -12.4 (1B), -16.3 (1B). IR (KBr, cm<sup>-1</sup>): ν<sub>BH</sub> 2553 (vs). Anal. Calcd for: C<sub>26</sub>H<sub>48</sub>B<sub>9</sub>NSi<sub>2</sub>Zr (**2d**): C, 50.42; H, 7.81; N, 2.26. Found: C, 50.21; H, 7.55; N, 2.33.

**Preparation of [η<sup>1</sup>:σ:η<sup>5</sup>-{MeN[CH<sub>2</sub>(Ph)C=C(TMS)]CH<sub>2</sub>CH<sub>2</sub>}C<sub>2</sub>B<sub>9</sub>H<sub>10</sub>]Zr(η<sup>5</sup>-Cp'') (**2e**).**

This complex was prepared as orange crystals from **1** (101 mg, 0.2 mmol) and trimethylsilylphenylacetylene (35 mg, 0.2 mmol) in toluene (10 mL), using the same procedure reported for **2c**: yield 103 mg (76%). <sup>1</sup>H NMR (pyridine-*d*<sub>5</sub>): δ 8.10 (s, 1H), 7.65 (m, 1H), 7.54 (m, 1H) [C<sub>5</sub>H<sub>3</sub>(TMS)<sub>2</sub>], 7.37 (m, 2H), 7.26 (m, 1H), 7.16 (m, 2H) (C<sub>6</sub>H<sub>5</sub>), 4.58 (d, *J* = 15.0 Hz, 1H), 3.24 (d, *J* = 15.0 Hz, 1H) (PhCCH<sub>2</sub>NMe), 4.56 (br s, 1H) (cage CH), 3.85 (m, 1H), 2.63 (m, 1H) (CH<sub>2</sub>CH<sub>2</sub>NMe), 2.45 (s, 3H) (NCH<sub>3</sub>), 2.48 (m, 1H), 2.26 (m, 1H) (CH<sub>2</sub>CH<sub>2</sub>NMe), 0.45 (s, 9H), 0.34 (s, 9H), -0.03 (s, 9H) [Si(CH<sub>3</sub>)<sub>3</sub>]. <sup>13</sup>C{<sup>1</sup>H} NMR (pyridine-*d*<sub>5</sub>): δ 202.2 (Zr-C<sub>α</sub>), 153.0 (Zr-C<sub>α</sub>C<sub>β</sub>), 145.7, 137.0, 132.8, 130.0, 128.3, 127.6, 126.8, 126.3, 124.9 [C<sub>6</sub>H<sub>5</sub> + C<sub>5</sub>H<sub>3</sub>(TMS)<sub>2</sub>], 70.8 (PhCCH<sub>2</sub>NMe), 64.8 (CH<sub>2</sub>CH<sub>2</sub>NMe), 47.3 (NCH<sub>3</sub>), 35.8 (CH<sub>2</sub>CH<sub>2</sub>NMe), 3.1, 0.3, -0.1 [Si(CH<sub>3</sub>)<sub>3</sub>], cage carbons were not observed. <sup>11</sup>B{<sup>1</sup>H} NMR (pyridine-*d*<sub>5</sub>): δ 1.9 (1B), -2.3 (2B), -4.0 (2B), -9.8 (1B), -11.6 (1B), -16.5 (2B). IR (KBr, cm<sup>-1</sup>): ν<sub>BH</sub> 2558 (vs). Anal. Calcd for C<sub>28</sub>H<sub>54</sub>B<sub>9</sub>NSi<sub>3</sub>Zr (**2e**): C, 49.64; H, 8.03; N, 2.07. Found: C, 49.63; H, 8.09; N, 1.79.

**Preparation of [η<sup>1</sup>:σ:η<sup>5</sup>-{MeN[CH<sub>2</sub>(<sup>*t*</sup>Bu)C=C(TMS)]CH<sub>2</sub>CH<sub>2</sub>}C<sub>2</sub>B<sub>9</sub>H<sub>10</sub>]Zr(η<sup>5</sup>-Cp'') (**2f**).**

This complex was prepared as orange crystals from **1** (101 mg, 0.2 mmol) and 1-trimethylsilyl-1-hexyne (31 mg, 0.2 mmol) in toluene (10 mL), using the same procedure

reported for **2c**: yield 106 mg (81%).  $^1\text{H}$  NMR (benzene- $d_6$ ):  $\delta$  7.34 (s, 1H), 7.20 (m, 1H), 6.45 (m, 1H) [ $\text{C}_5\text{H}_3(\text{TMS})_2$ ], 4.08 (br s, 1H) (cage CH), 3.40 (d,  $J = 15.0$  Hz, 1H), 2.35 (d,  $J = 15.0$  Hz, 1H) ( $\text{MeNCH}_2\text{C}^n\text{Bu}$ ), 2.49 (m, 1H), 2.39 (m, 1H) ( $\text{CH}_2\text{CH}_2\text{NMe}$ ), 2.05 (t,  $J = 6.0$  Hz, 2H) ( $\text{CH}_2\text{CH}_2\text{CH}_2\text{CH}_3$ ), 1.82 (m, 2H) ( $\text{CH}_2\text{CH}_2\text{NMe}$ ), 1.77 (s, 3H) ( $\text{NCH}_3$ ), 1.31 – 1.27 (m, 4H) ( $\text{CH}_2\text{CH}_2\text{CH}_2\text{CH}_3$ ), 0.96 (t,  $J = 9.0$  Hz, 3H) ( $\text{CH}_2\text{CH}_2\text{CH}_2\text{CH}_3$ ), 0.30 (s, 9H), 0.20 (s, 9H), 0.18 (s, 9H) [ $\text{Si}(\text{CH}_3)_3$ ].  $^{13}\text{C}\{^1\text{H}\}$  NMR (benzene- $d_6$ ):  $\delta$  201.7 (Zr- $\text{C}_\alpha$ ), 152.6 (Zr- $\text{C}_\alpha\text{C}_\beta$ ), 135.0, 133.2, 131.4, 128.9, 125.4 ( $\text{C}_5\text{H}_3(\text{Si}(\text{CH}_3)_3)_2$ ), 68.9 ( $^n\text{BuCCH}_2\text{NMe}$ ), 67.5 ( $\text{CH}_2\text{CH}_2\text{NMe}$ ), 58.6 (cage C), 50.5 ( $\text{NCH}_3$ ), 40.7 ( $\text{CH}_2\text{CH}_2\text{CH}_2\text{CH}_3$ ), 37.9 ( $\text{CH}_2\text{CH}_2\text{NMe}$ ), 30.8, 23.5, 14.2 ( $\text{CH}_2\text{CH}_2\text{CH}_2\text{CH}_3$ ), 4.0, 1.0, 0.9 [ $\text{Si}(\text{CH}_3)_3$ ].  $^{11}\text{B}\{^1\text{H}\}$  NMR (benzene- $d_6$ ):  $\delta$  1.4 (1B), -2.1 (2B), -3.7 (1B), -7.4 (2B), -10.4 (1B), -15.2 (2B). IR (KBr,  $\text{cm}^{-1}$ ):  $\nu_{\text{BH}}$  2548 (vs). Anal. Calcd for  $\text{C}_{26}\text{H}_{58}\text{B}_9\text{NSi}_3\text{Zr}$  (**2f**): C, 47.49; H, 8.89; N, 2.13. Found: C, 47.55; H, 9.02; N, 2.32.

**Preparation of  $[\eta^1:\sigma:\eta^5\text{-}\{\text{MeN}[\text{CH}_2(^n\text{Bu})\text{C}=\text{C}(\text{H})]\text{CH}_2\text{CH}_2\}\text{C}_2\text{B}_9\text{H}_{10}]\text{Zr}(\eta^5\text{-Cp}^*)$  (**3a**).**

This complex was prepared as orange crystals from **1** (101 mg, 0.2 mmol) and 1-hexyne (16 mg, 0.2 mmol) in toluene (10 mL), using the same procedure reported for **2a**: yield 95 mg (81%).  $^1\text{H}$  NMR (benzene- $d_6$ ):  $\delta$  7.81 (s, 1H), 6.46 (m, 1H), 6.13 (m, 1H) [ $\text{C}_5\text{H}_3(\text{TMS})_2$ ], 4.85 (s, 1H) (Zr-CH), 3.94 (br s, 1H) (cage CH), 3.07 (d,  $J = 13.5$  Hz, 1H), 2.12 (d,  $J = 13.5$  Hz, 1H) ( $\text{MeNCH}_2\text{C}^n\text{Bu}$ ), 2.47 (m, 2H) ( $\text{CH}_2\text{CH}_2\text{NMe}$ ), 2.28 (m, 2H) ( $\text{CH}_2\text{CH}_2\text{NMe}$ ), 1.55 (s, 3H) ( $\text{NCH}_3$ ), 1.31 - 0.99 (m, 6H) ( $(\text{CH}_2)_3\text{CH}_3$ ), 0.97 (t,  $J = 6.9$  Hz, 3H) [ $(\text{CH}_2)_3\text{CH}_3$ ], 0.34 (s, 9H), 0.19 (s, 9H) [ $\text{Si}(\text{CH}_3)_3$ ].  $^{13}\text{C}\{^1\text{H}\}$  NMR (benzene- $d_6$ ):  $\delta$  181.9 (Zr- $\text{C}_\alpha$ ), 143.4 (Zr- $\text{C}_\alpha\text{C}_\beta$ ), 134.6, 131.9, 131.5, 125.8, 123.2 [ $\text{C}_5\text{H}_3(\text{TMS})_2$ ], 69.6 ( $^n\text{BuCCH}_2\text{NMe}$ ), 66.3 ( $\text{CH}_2\text{CH}_2\text{NMe}$ ), 48.6 ( $\text{NCH}_3$ ), 45.3 ( $\text{CH}_2\text{CH}_2\text{CH}_2\text{CH}_3$ ), 38.7 ( $\text{CH}_2\text{CH}_2\text{NMe}$ ), 30.4, 23.5 14.6 ( $\text{CH}_2\text{CH}_2\text{CH}_2\text{CH}_3$ ), 1.2, 0.6 [ $\text{Si}(\text{CH}_3)_3$ ], cage carbons were not observed.  $^{11}\text{B}\{^1\text{H}\}$  NMR (benzene- $d_6$ ):  $\delta$  -0.4 (2B), -2.8 (2B), -6.7 (1B), -9.8 (1B), -11.5 (1B),

-16.5 (2B). IR (KBr,  $\text{cm}^{-1}$ ):  $\nu_{\text{BH}}$  2547 (vs). Anal. Calcd for  $\text{C}_{23}\text{H}_{50}\text{B}_9\text{NSi}_2\text{Zr}$  (**3a**): C, 47.20; H, 8.61; N, 2.39. Found: C, 47.11; H, 9.01; N, 2.55.

**Preparation of  $[\eta^1:\sigma:\eta^5\text{-}\{\text{MeN}[\text{CH}_2(\text{Ph})\text{C}=\text{C}(\text{H})]\text{CH}_2\text{CH}_2\}\text{C}_2\text{B}_9\text{H}_{10}]\text{Zr}(\eta^5\text{-Cp}'')$  (**3b**).** This complex was prepared as orange crystals from **1** (101 mg, 0.2 mmol) and phenylacetylene (20 mg, 0.2 mmol) in toluene (10 mL), using the same procedure reported for **2a**: yield 91 mg (75%).  $^1\text{H}$  NMR (benzene- $d_6$ ):  $\delta$  7.88 (s, 1H), 7.47 (m, 1H), 6.11 (m, 1H) [ $\text{C}_5\text{H}_3(\text{TMS})_2$ ], 7.22 (m, 2H), 7.09 (m, 3H) ( $\text{C}_6\text{H}_5$ ), 7.07 (s, 1H) (Zr-CH), 3.90 (br s, 1H) (cage CH), 3.45 (d,  $J = 15.0$  Hz, 1H), 2.85 (d,  $J = 15.0$  Hz, 1H) ( $\text{MeNCH}_2\text{CPh}$ ), 2.56 (m, 1H), 2.19 (m, 1H) ( $\text{CH}_2\text{CH}_2\text{NMe}$ ), 1.77 (m, 1H), 1.59 (m, 1H) ( $\text{CH}_2\text{CH}_2\text{NMe}$ ), 1.53 (s, 3H) ( $\text{NCH}_3$ ), 0.32 (s, 9H), 0.16 (s, 9H) [ $\text{Si}(\text{CH}_3)_3$ ].  $^{13}\text{C}\{^1\text{H}\}$  NMR (benzene- $d_6$ ):  $\delta$  187.5 (Zr- $\text{C}_\alpha$ ), 141.8 (Zr- $\text{C}_\alpha\text{C}_\beta$ ), 140.1, 135.3, 132.3, 131.0, 129.2, 127.8, 125.2, 123.4, 122.3 [ $\text{C}_6\text{H}_5 + \text{C}_5\text{H}_3(\text{TMS})_2$ ], 68.6 ( $\text{PhCCH}_2\text{NMe}$ ), 65.9 ( $\text{CH}_2\text{CH}_2\text{NCH}_3$ ), 59.3 (cage C), 47.9 ( $\text{NCH}_3$ ), 38.3 ( $\text{CH}_2\text{CH}_2\text{NMe}$ ), 1.1, 0.5 [ $\text{Si}(\text{CH}_3)_3$ ].  $^{11}\text{B}\{^1\text{H}\}$  NMR (benzene- $d_6$ ):  $\delta$  -0.2 (2B), -2.4 (2B), -6.3 (2B), -9.5(2B), -15.9 (1B). IR (KBr,  $\text{cm}^{-1}$ ):  $\nu_{\text{BH}}$  2550 (vs). Anal. Calcd for  $\text{C}_{25}\text{H}_{46}\text{B}_9\text{NSi}_2\text{Zr}$  (**3b**): C, 49.60; H, 7.66; N, 2.31. Found: C, 49.15; H, 7.60; N, 2.46.

**Preparation of  $[\eta^1:\sigma:\eta^5\text{-}\{\text{MeN}[\text{CH}_2(\text{H})\text{C}=\text{C}(\text{TMS})]\text{CH}_2\text{CH}_2\}\text{C}_2\text{B}_9\text{H}_{10}]\text{Zr}(\eta^5\text{-Cp}'')$  (**3c**).** This complex was prepared as orange crystals from **1** (101 mg, 0.2 mmol) and trimethylsilylacetylene (20 mg, 0.2 mmol) in toluene (10 mL), using the same procedure reported for **2a**: yield 94 mg (78%).  $^1\text{H}$  NMR (benzene- $d_6$ ):  $\delta$  7.63 (s, 1H), 6.86 (m, 1H), 6.71 (m, 1H) [ $\text{C}_5\text{H}_3(\text{TMS})_2$ ], 6.43 (dd,  $J = 1.5$  and 3.0 Hz, 1H) ( $\text{CH}_2\text{CHCTMS}$ ), 4.10 (br s, 1H) (cage CH), 3.05 (dd,  $J = 1.5$  and 15.0 Hz, 1H), 2.15 (dd,  $J = 3.0$  and 15.0 Hz, 1H) ( $\text{MeNCH}_2\text{CH}$ ), 2.73 (m, 2H) ( $\text{CH}_2\text{CH}_2\text{NMe}$ ), 1.60 (m, 2H) ( $\text{CH}_2\text{CH}_2\text{NMe}$ ) 1.47 (s, 3H) ( $\text{NCH}_3$ ), 0.34 (s, 9H), 0.21 (s, 9H), 0.12 (s, 9H) [ $\text{Si}(\text{CH}_3)_3$ ].  $^{13}\text{C}\{^1\text{H}\}$  NMR (benzene- $d_6$ ):  $\delta$  211.7 (Zr $\text{C}_\alpha$ ), 140.3 (Zr $\text{C}_\alpha\text{C}_\beta$ ), 137.1, 133.1, 132.2, 129.4, 129.2 [ $\text{C}_5\text{H}_3(\text{TMS})_2$ ], 66.9 ( $\text{HCCH}_2\text{NMe}$ ), 64.5 ( $\text{CH}_2\text{CH}_2\text{NMe}$ ), 51.9 (cage C), 46.9

(NCH<sub>3</sub>), 36.8 (CH<sub>2</sub>CH<sub>2</sub>NMe), 1.2, 0.9, -0.8 [Si(CH<sub>3</sub>)<sub>3</sub>]. <sup>11</sup>B{<sup>1</sup>H} NMR (benzene-*d*<sub>6</sub>): δ 2.2 (1B), -2.7 (3B), -3.7 (1B), -6.5 (1B), -9.6 (1B), -13.4 (1B), -16.7 (1B). IR (KBr, cm<sup>-1</sup>): ν<sub>BH</sub> 2522 (vs). Anal. Calcd for C<sub>22</sub>H<sub>50</sub>B<sub>9</sub>NSi<sub>3</sub>Zr (**3c**): C, 43.94; H, 8.38; N, 2.33. Found: C, 43.80; H, 7.98; N, 1.95.

**Preparation of (η<sup>5</sup>-Cp'') [η<sup>1</sup>:η<sup>5</sup>-(Me<sub>2</sub>NCH<sub>2</sub>CH<sub>2</sub>)C<sub>2</sub>B<sub>9</sub>H<sub>10</sub>]Zr[C≡C(<sup>t</sup>Bu)] (**4**).** Complex **4** was prepared as orange crystals from **1** (101 mg, 0.2 mmol) and 3,3-dimethyl-1-butyne (16 mg, 0.2 mmol) in toluene (10 mL), using the same procedure reported for **2a**: yield 95 mg (75%). <sup>1</sup>H NMR (benzene-*d*<sub>6</sub>): δ 7.50 (s, 1H), 7.06 (m, 1H), 5.64 (m, 1H) [C<sub>5</sub>H<sub>3</sub>(TMS)<sub>2</sub>], 5.12 (br s, 1H) (cage CH), 3.31 (m, 2H) (CH<sub>2</sub>CH<sub>2</sub>NMe<sub>2</sub>), 2.26 (m, 1H), 1.85 (m, 1H) (CH<sub>2</sub>CH<sub>2</sub>NMe<sub>2</sub>), 2.05 (s, 3H), 1.44 (s, 3H) [N(CH<sub>3</sub>)<sub>2</sub>], 1.08 (s, 9H) [C(CH<sub>3</sub>)<sub>3</sub>], 0.38 (s, 9H), 0.34 (s, 9H) [Si(CH<sub>3</sub>)<sub>3</sub>]. <sup>13</sup>C{<sup>1</sup>H} NMR (benzene-*d*<sub>6</sub>): δ 131.9, 131.4, 129.6, 126.6, 126.0, 125.6 [C<sub>5</sub>H<sub>3</sub>(TMS)<sub>2</sub> + ZrC<sub>α</sub>], 90.2 (ZrC<sub>α</sub>C<sub>β</sub>), 65.0 (CH<sub>2</sub>CH<sub>2</sub>NMe<sub>2</sub>), 59.3 (cage C), 53.3, 47.7 [N(CH<sub>3</sub>)<sub>2</sub>], 36.7 (CH<sub>2</sub>CH<sub>2</sub>NMe), 31.2 [C(CH<sub>3</sub>)<sub>3</sub>], 29.8 [C(CH<sub>3</sub>)<sub>3</sub>], 1.3, 1.4 [Si(CH<sub>3</sub>)<sub>3</sub>]. <sup>11</sup>B{<sup>1</sup>H} NMR (benzene-*d*<sub>6</sub>): δ 2.2 (1B), -0.5 (1B), -1.9 (2B), -3.8 (1B), -6.4 (1B), -9.5 (1B), -12.6 (1B), -16.7 (1B). IR (KBr, cm<sup>-1</sup>): ν<sub>BH</sub> 2557 (vs). Anal. Calcd for C<sub>26.5</sub>H<sub>54</sub>B<sub>9</sub>NSi<sub>2</sub>Zr (**4** + 0.5toluene): C, 50.41; H, 8.62; N, 2.22. Found: C, 50.28; H, 8.14; N, 1.79.

**Reaction of 1 with Alkene. A Representative Procedure.** To a toluene (5 mL) solution of **1** (101 mg, 0.2 mmol) was added 1-hexene (42 mg, 0.5 mmol) at room temperature, and the reaction mixture was stirred at room temperature overnight. A portion of solution (0.5 mL) was taken from this mixture, which was subject to <sup>1</sup>H NMR analysis after replacing toluene with benzene-*d*<sub>6</sub>. The result showed that it was still **1** and no insertion product was observed. The remaining reaction mixture was then heated at 100 °C for 24 h. The <sup>1</sup>H NMR analyses suggested that **1** remained intact and no product was found.



**X-ray Structure Determination.** All single crystals were immersed in Paraton-N oil and sealed under N<sub>2</sub> in thin-walled glass capillaries. Data were collected at 293 K on a Bruker SMART APEX CCD diffractometer using Mo K $\alpha$  radiation (0.71073 Å). An empirical absorption correction was applied using the SADABS program.<sup>6</sup> All structures were solved by direct methods and subsequent Fourier difference techniques and refined anisotropically for all non-hydrogen atoms by full-matrix least-squares on  $F^2$  using the SHELXTL program package.<sup>7</sup> All hydrogen atoms were geometrically fixed using the riding model. Details of the crystal structures were deposited in the Cambridge Crystallographic Data Centre with CCDC-1041216–1041224 for **1**, **2a**, **2c–f**, **3b**, **3c** and **4**.

## References

- 1 (a) M.-S. Cheung, H.-S. Chan and Z. Xie, *Organometallics*, 2005, 24, 5217; (b) M.-S. Cheung, H.-S. Chan and Z. Xie, *Dalton Trans.*, 2005, 2375.
- 2 S. J. Lancaster, O. B. Robinson, M. Bochmann, S. J. Coles and M. B. Hursthouse, *Organometallics*, 1995, 14, 2456.
- 3 H. M. Weiss, K. M. Touchette, S. Angell and J. Khan, *Org. Biomol. Chem.*, 2003, 1, 2152.
- 4 P. C. B. Page and Rosenthal, S. *Tetrahedron*, 1990, 46, 2573.
- 5 H. J. Bestmann, T. Zeibig and O. Vostrowsky, *Synthesis*, 1990, 1039.
- 6 G. M. Sheldrick, SADABS: Program for Empirical Absorption Correction of Area Detector Data. University of Göttingen: Germany, 1996.
- 7 G. M. Sheldrick, SHELXTL 5.10 for Windows NT: Structure Determination Software Programs. Bruker Analytical X-ray systems, Inc.: Madison, Wisconsin, USA, 1997.

Table S1 Crystal data and summary of data collection and refinement.

|                                               | <b>1</b>                                          | <b>2a</b>                                         | <b>2c·C<sub>7</sub>H<sub>8</sub></b>              | <b>2d</b>                                         |
|-----------------------------------------------|---------------------------------------------------|---------------------------------------------------|---------------------------------------------------|---------------------------------------------------|
| formula                                       | C <sub>17</sub> H <sub>40</sub> B <sub>9</sub> N- | C <sub>23</sub> H <sub>50</sub> B <sub>9</sub> N- | C <sub>38</sub> H <sub>56</sub> B <sub>9</sub> N- | C <sub>26</sub> H <sub>48</sub> B <sub>9</sub> N- |
|                                               | Si <sub>2</sub> Zr                                | Si <sub>2</sub> Zr                                | Si <sub>2</sub> Zr                                | Si <sub>2</sub> Zr                                |
| cryst size (mm)                               | 0.50 x 0.40<br>x 0.30                             | 0.60 x 0.35<br>x 0.25                             | 0.24 x 0.20<br>x 0.14                             | 0.40 x 0.30<br>x 0.20                             |
| fw                                            | 503.2                                             | 585.3                                             | 771.5                                             | 619.3                                             |
| cryst syst                                    | monoclinic                                        | monoclinic                                        | triclinic                                         | triclinic                                         |
| space group                                   | <i>P</i> 2 <sub>1</sub> / <i>c</i>                | <i>P</i> 2 <sub>1</sub> / <i>c</i>                | <i>P</i> (-1)                                     | <i>P</i> (-1)                                     |
| <i>a</i> , Å                                  | 15.927(3)                                         | 19.577(3)                                         | 10.175(2)                                         | 10.199(2)                                         |
| <i>b</i> , Å                                  | 9.976(2)                                          | 9.974(1)                                          | 11.110 (2)                                        | 11.637(2)                                         |
| <i>c</i> , Å                                  | 17.407(4)                                         | 16.926(2)                                         | 22.337(4)                                         | 15.352(2)                                         |
| <i>α</i> , deg                                | 90                                                | 90                                                | 91.67 (1)                                         | 80.63(1)                                          |
| <i>β</i> , deg                                | 101.14(1)                                         | 99.29 (1)                                         | 91.91 (1)                                         | 74.97(1)                                          |
| <i>γ</i> , deg                                | 90                                                | 90                                                | 114.03 (1)                                        | 76.18(1)                                          |
| <i>V</i> , Å <sup>3</sup>                     | 2713.7(9)                                         | 3261.6(7)                                         | 2302.5(7)                                         | 1698.8(4)                                         |
| <i>Z</i>                                      | 4                                                 | 4                                                 | 2                                                 | 2                                                 |
| <i>D</i> <sub>calcd</sub> , Mg/m <sup>3</sup> | 1.232                                             | 1.192                                             | 1.113                                             | 1.211                                             |
| radiation (λ), Å                              | Mo Kα                                             | Mo Kα                                             | Mo Kα                                             | Mo Kα                                             |
|                                               | (0.71073)                                         | (0.71073)                                         | (0.71073)                                         | (0.71073)                                         |
| 2θ range, deg                                 | 2.6 to 56.8                                       | 4.2 to 56.0                                       | 4.0 to 50.0                                       | 2.8 to 50.0                                       |
| μ, mm <sup>-1</sup>                           | 0.500                                             | 0.425                                             | 0.316                                             | 0.412                                             |
| <i>F</i> (000)                                | 1048                                              | 1232                                              | 808                                               | 648                                               |
| no. of obsd rflns                             | 6716                                              | 7858                                              | 7965                                              | 5942                                              |
| no. of params refnd                           | 271                                               | 325                                               | 496                                               | 352                                               |
| goodness of fit                               | 1.034                                             | 1.067                                             | 0.956                                             | 1.065                                             |
| R1                                            | 0.051                                             | 0.034                                             | 0.075                                             | 0.037                                             |
| wR2                                           | 0.119                                             | 0.088                                             | 0.220                                             | 0.090                                             |

|                                               | <b>2e</b>                                         | <b>2f</b>                                         | <b>3b</b>                                         | <b>3c</b>                                         | <b>4·0.5C<sub>7</sub>H<sub>8</sub></b>             |
|-----------------------------------------------|---------------------------------------------------|---------------------------------------------------|---------------------------------------------------|---------------------------------------------------|----------------------------------------------------|
| formula                                       | C <sub>28</sub> H <sub>54</sub> B <sub>9</sub> N- | C <sub>26</sub> H <sub>58</sub> B <sub>9</sub> N- | C <sub>25</sub> H <sub>46</sub> B <sub>9</sub> N- | C <sub>22</sub> H <sub>50</sub> B <sub>9</sub> N- | C <sub>26.5</sub> H <sub>54</sub> B <sub>9</sub> N |
|                                               | Si <sub>3</sub> Zr                                | Si <sub>3</sub> Zr                                | Si <sub>2</sub> Zr                                | Si <sub>3</sub> Zr                                | -Si <sub>2</sub> Zr                                |
| cryst size (mm)                               | 0.40 x 0.30<br>x 0.20                             | 0.50 x 0.30<br>x 0.20                             | 0.24 x 0.20<br>x 0.18                             | 0.50 x 0.30<br>x 0.20                             | 0.30 x 0.20<br>x 0.20                              |
| fw                                            | 677.5                                             | 657.5                                             | 605.3                                             | 601.4                                             | 631.4                                              |
| cryst syst                                    | monoclinic                                        | monoclinic                                        | monoclinic                                        | monoclinic                                        | monoclinic                                         |
| space group                                   | <i>P</i> 2 <sub>1</sub> / <i>c</i>                | <i>P</i> 2 <sub>1</sub> / <i>n</i>                | <i>P</i> 2 <sub>1</sub> / <i>c</i>                | <i>P</i> 2 <sub>1</sub> / <i>c</i>                | <i>P</i> 2 <sub>1</sub> / <i>c</i>                 |
| <i>a</i> , Å                                  | 19.530(2)                                         | 18.371(2)                                         | 10.720(1)                                         | 11.055(4)                                         | 10.909 (1)                                         |
| <i>b</i> , Å                                  | 10.208(1)                                         | 10.614(1)                                         | 17.942(2)                                         | 30.190(9)                                         | 9.538(1)                                           |
| <i>c</i> , Å                                  | 20.640(2)                                         | 20.465(2)                                         | 16.946(2)                                         | 10.338(3)                                         | 34.342(3)                                          |
| $\alpha$ , deg                                | 90                                                | 90                                                | 90                                                | 90                                                | 90                                                 |
| $\beta$ , deg                                 | 115.68(1)                                         | 115.75(1)                                         | 96.34(1)                                          | 107.93(6)                                         | 92.43(1)                                           |
| $\gamma$ , deg                                | 90                                                | 90                                                | 90                                                | 90                                                | 90                                                 |
| <i>V</i> , Å <sup>3</sup>                     | 3708.2(8)                                         | 3594.1(5)                                         | 3239.4(7)                                         | 3283.0(2)                                         | 3570.1(6)                                          |
| <i>Z</i>                                      | 4                                                 | 4                                                 | 4                                                 | 4                                                 | 4                                                  |
| <i>D</i> <sub>calcd</sub> , Mg/m <sup>3</sup> | 1.214                                             | 1.215                                             | 1.241                                             | 1.217                                             | 1.175                                              |
| radiation ( $\lambda$ ), Å                    | Mo K $\alpha$                                      |
|                                               | (0.71073)                                         | (0.71073)                                         | (0.71073)                                         | (0.71073)                                         | (0.71073)                                          |
| 2 $\theta$ range, deg                         | 2.2 to 56.0                                       | 2.5 to 50.0                                       | 3.3 to 50.0                                       | 2.7 to 56.0                                       | 2.4 to 50.0                                        |
| $\mu$ , mm <sup>-1</sup>                      | 0.414                                             | 0.425                                             | 0.430                                             | 0.459                                             | 0.393                                              |
| <i>F</i> (000)                                | 1424                                              | 1392                                              | 1264                                              | 1264                                              | 1332                                               |
| no. of obsd reflns                            | 8947                                              | 6332                                              | 5635                                              | 7855                                              | 6279                                               |
| no. of params refnd                           | 379                                               | 361                                               | 344                                               | 325                                               | 370                                                |
| goodness of fit                               | 0.986                                             | 1.055                                             | 1.005                                             | 1.064                                             | 1.067                                              |
| R1                                            | 0.052                                             | 0.045                                             | 0.080                                             | 0.044                                             | 0.049                                              |
| wR2                                           | 0.125                                             | 0.105                                             | 0.175                                             | 0.109                                             | 0.121                                              |

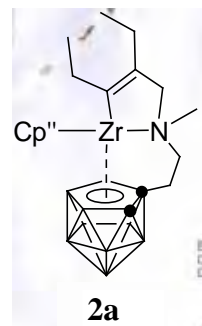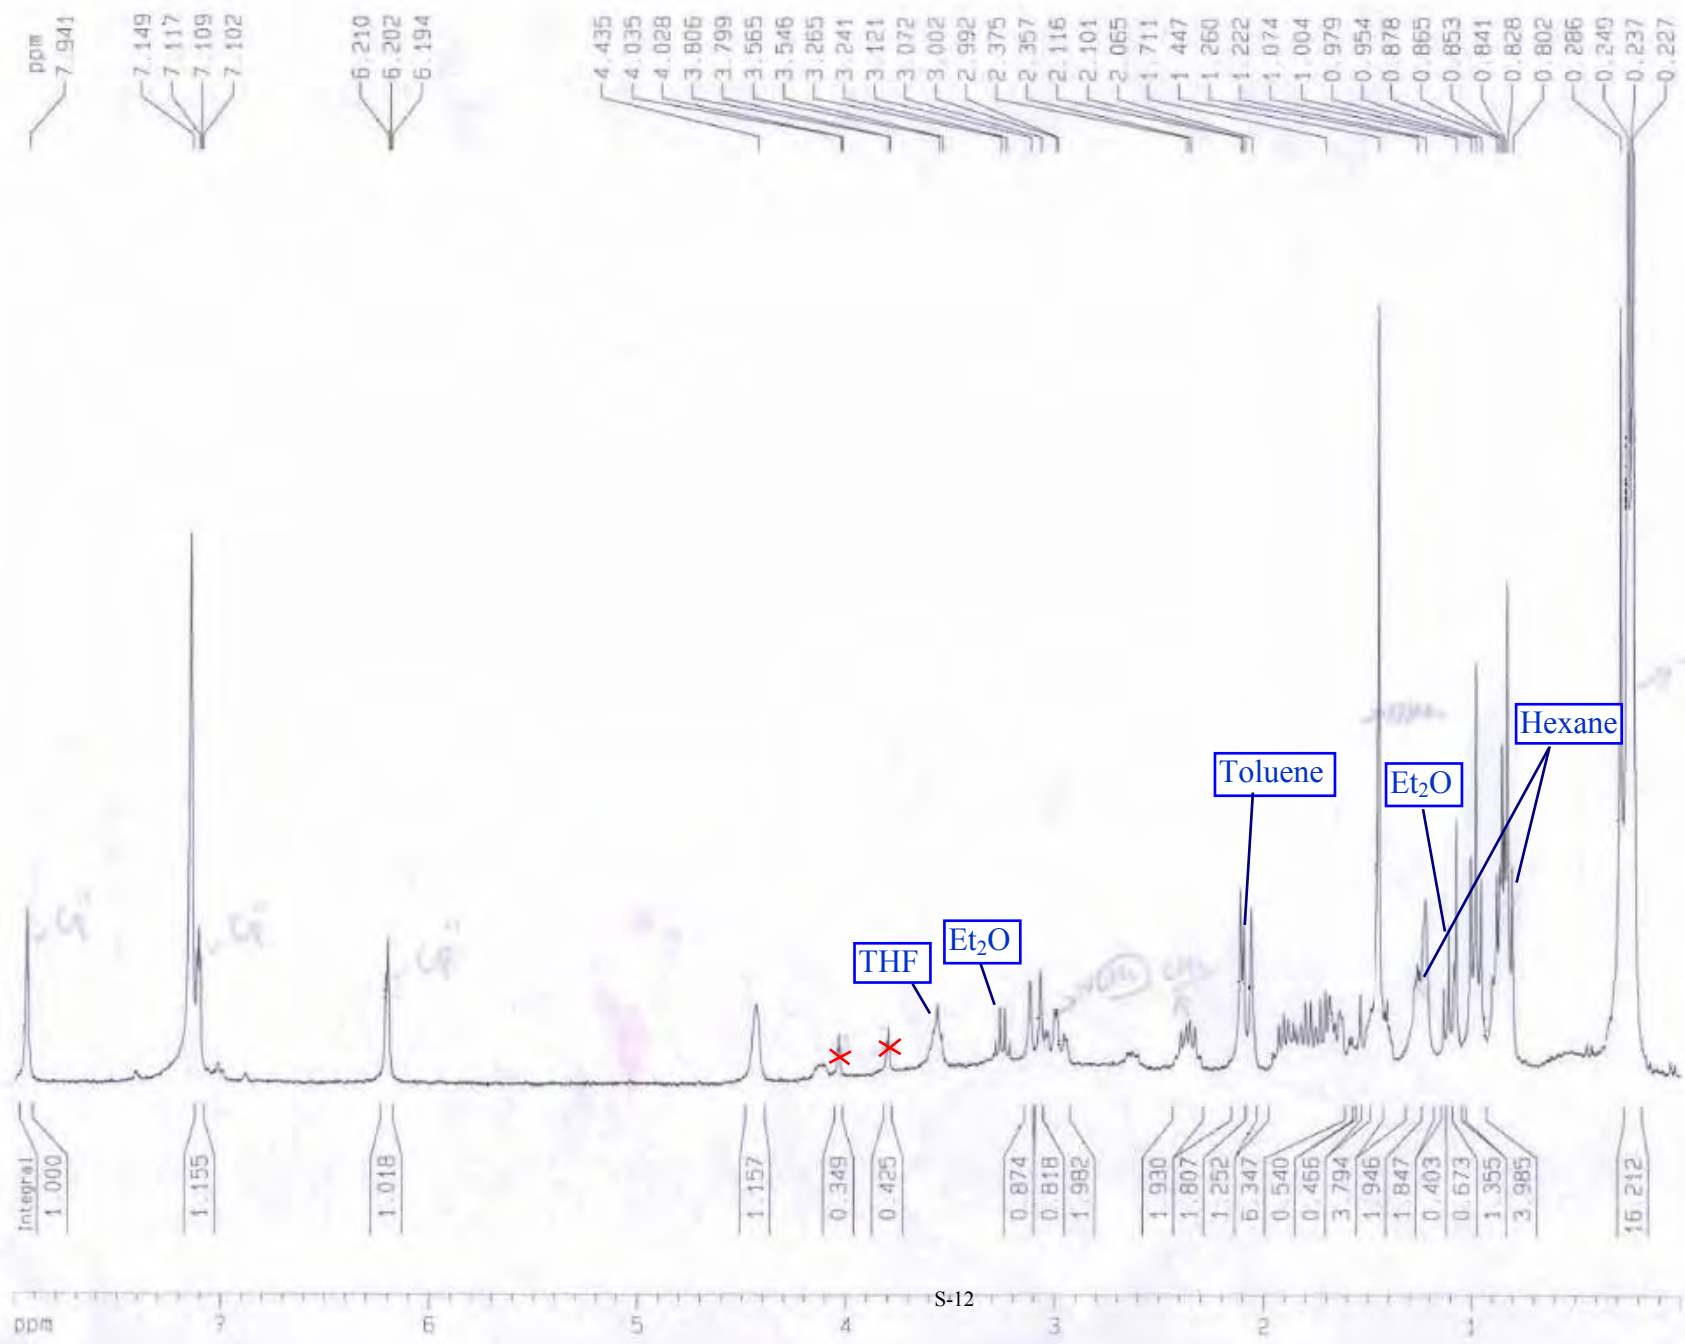

Current Data Parameters  
 NAME Idw199  
 EXPNO 3  
 PROCNO 1

F2 - Acquisition Parameters  
 Date\_ 20060607  
 Time 9.06  
 INSTRUM dpv300  
 PROBHD 5 mm BBO BB-1H  
 PULPROG zg  
 IQ 32768  
 SOLVENT Pyr  
 NS 16  
 DS 0  
 SWH 8992.606 Hz  
 FIDRES 0.274439 Hz  
 AQ 1.8219508 sec  
 RG 101.5  
 DW 55.600 usec  
 DE 79.43 usec  
 TE 0.0 K  
 D1 1.00000000 sec  
 MCREST 0.00000000 sec  
 MCWRK 0.01500000 sec

\*\*\*\*\* CHANNEL f1 \*\*\*\*\*  
 NUC1 1H  
 P1 5.00 usec  
 PL1 -2.00 dB  
 SFO1 300.1312000 MHz

F2 - Processing parameters  
 SI 32768  
 SF 300.1300363 MHz  
 WDW EM  
 SSB 0  
 LB 0.30 Hz  
 GB 0  
 PC 1.00

1D NMR plot parameters  
 CX 22.00 cm  
 CY 40.00 cm  
 F1P 8.000 ppm  
 F1 2401.04 Hz  
 F2P 0.000 ppm  
 F2 0.00 Hz  
 PPMCM 0.36364 ppm/cm  
 HZCM 109.13619 Hz/cm

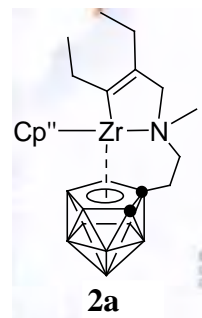

C13

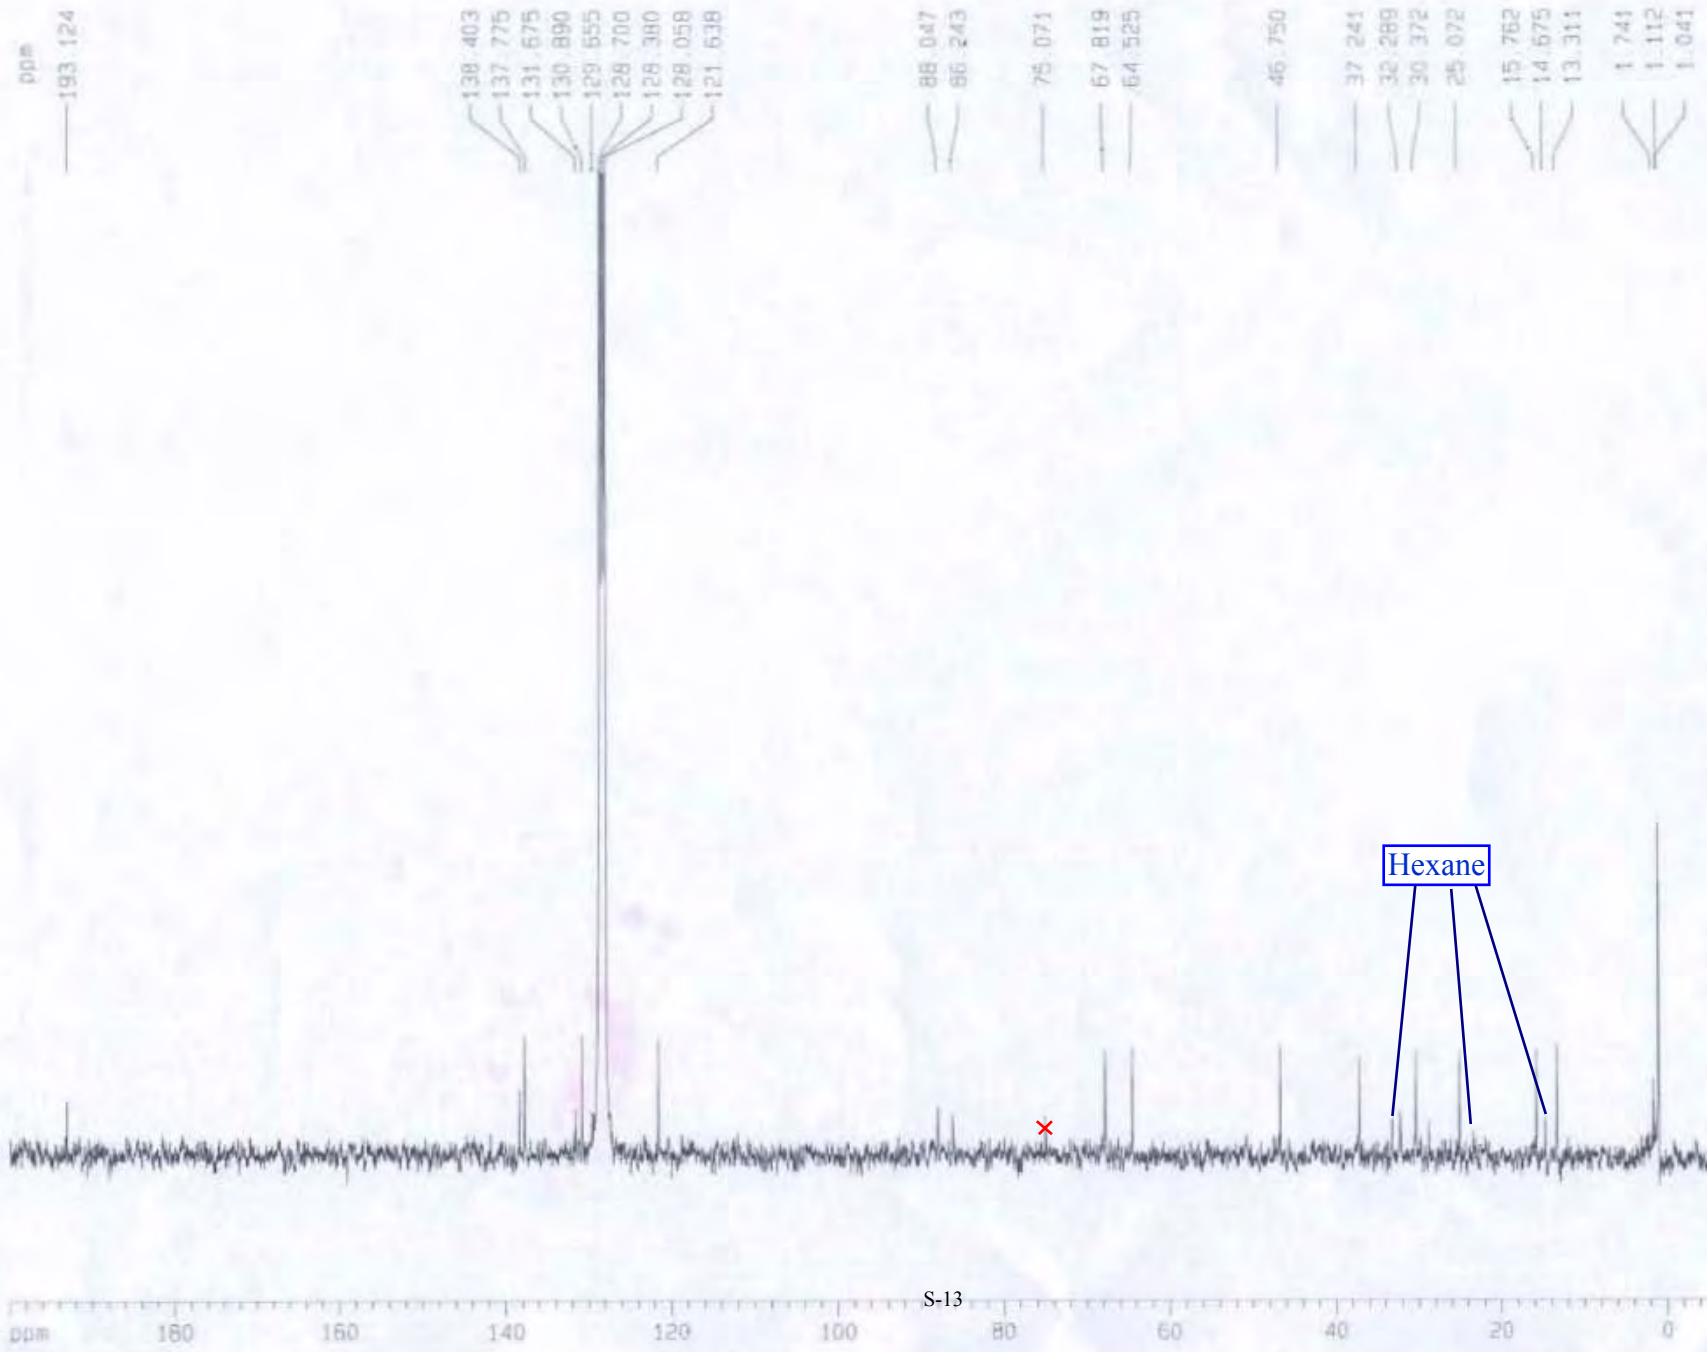

Current Data Parameters

|        |       |
|--------|-------|
| NAME   | 189-2 |
| EXPNO  | 11    |
| PROCNO | 1     |

F2 - Acquisition Parameters

|         |                  |
|---------|------------------|
| Date_   | 20070311         |
| Time    | 15.13            |
| INSTRUM | cp*300           |
| PROBHD  | 1.5 mm BBO BB-1H |
| PULPROG | zgdc             |
| TD      | 65536            |
| SOLVENT | Pyr              |
| NS      | 4000             |
| DS      | 8                |
| SWH     | 22675.736 Hz     |
| FIDRES  | 0.346304 Hz      |
| AQ      | 1.4451188 sec    |
| RG      | 8192             |
| DN      | 22.050 usec      |
| DE      | 6.00 usec        |
| TE      | 0.0 K            |
| D1      | 1.00000000 sec   |
| D11     | 0.03000000 sec   |
| MCREST  | 0.00000000 sec   |
| MCWRK   | 0.01500000 sec   |

----- CHANNEL f1 -----

|      |                |
|------|----------------|
| NUC1 | 13C            |
| P1   | 3.00 usec      |
| PL1  | -6.00 dB       |
| SFO1 | 75.4745111 MHz |

----- CHANNEL f2 -----

|         |                 |
|---------|-----------------|
| CPDPRG2 | waltz16         |
| NUC2    | 1H              |
| PCPD2   | 100.00 usec     |
| PL2     | 120.00 dB       |
| PL12    | 19.00 dB        |
| SFO2    | 300.1315007 MHz |

F2 - Processing parameters

|     |                |
|-----|----------------|
| S1  | 65536          |
| SF  | 75.4677053 MHz |
| WDW | EM             |
| SSB | 0              |
| LB  | 3.00 Hz        |
| GB  | 0              |
| PC  | 1.40           |

1D NMR plot parameters

|      |                 |
|------|-----------------|
| CX   | 23.00 cm        |
| CY   | 75.87 cm        |
| F1P  | 200.000 ppm     |
| F1   | 15093.54 Hz     |
| F2P  | -10.900 ppm     |
| F2   | -754.66 Hz      |
| PPHM | 9.13043 ppm/cm  |
| HZCM | 689.05298 Hz/cm |

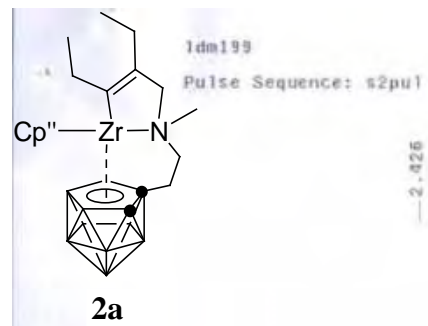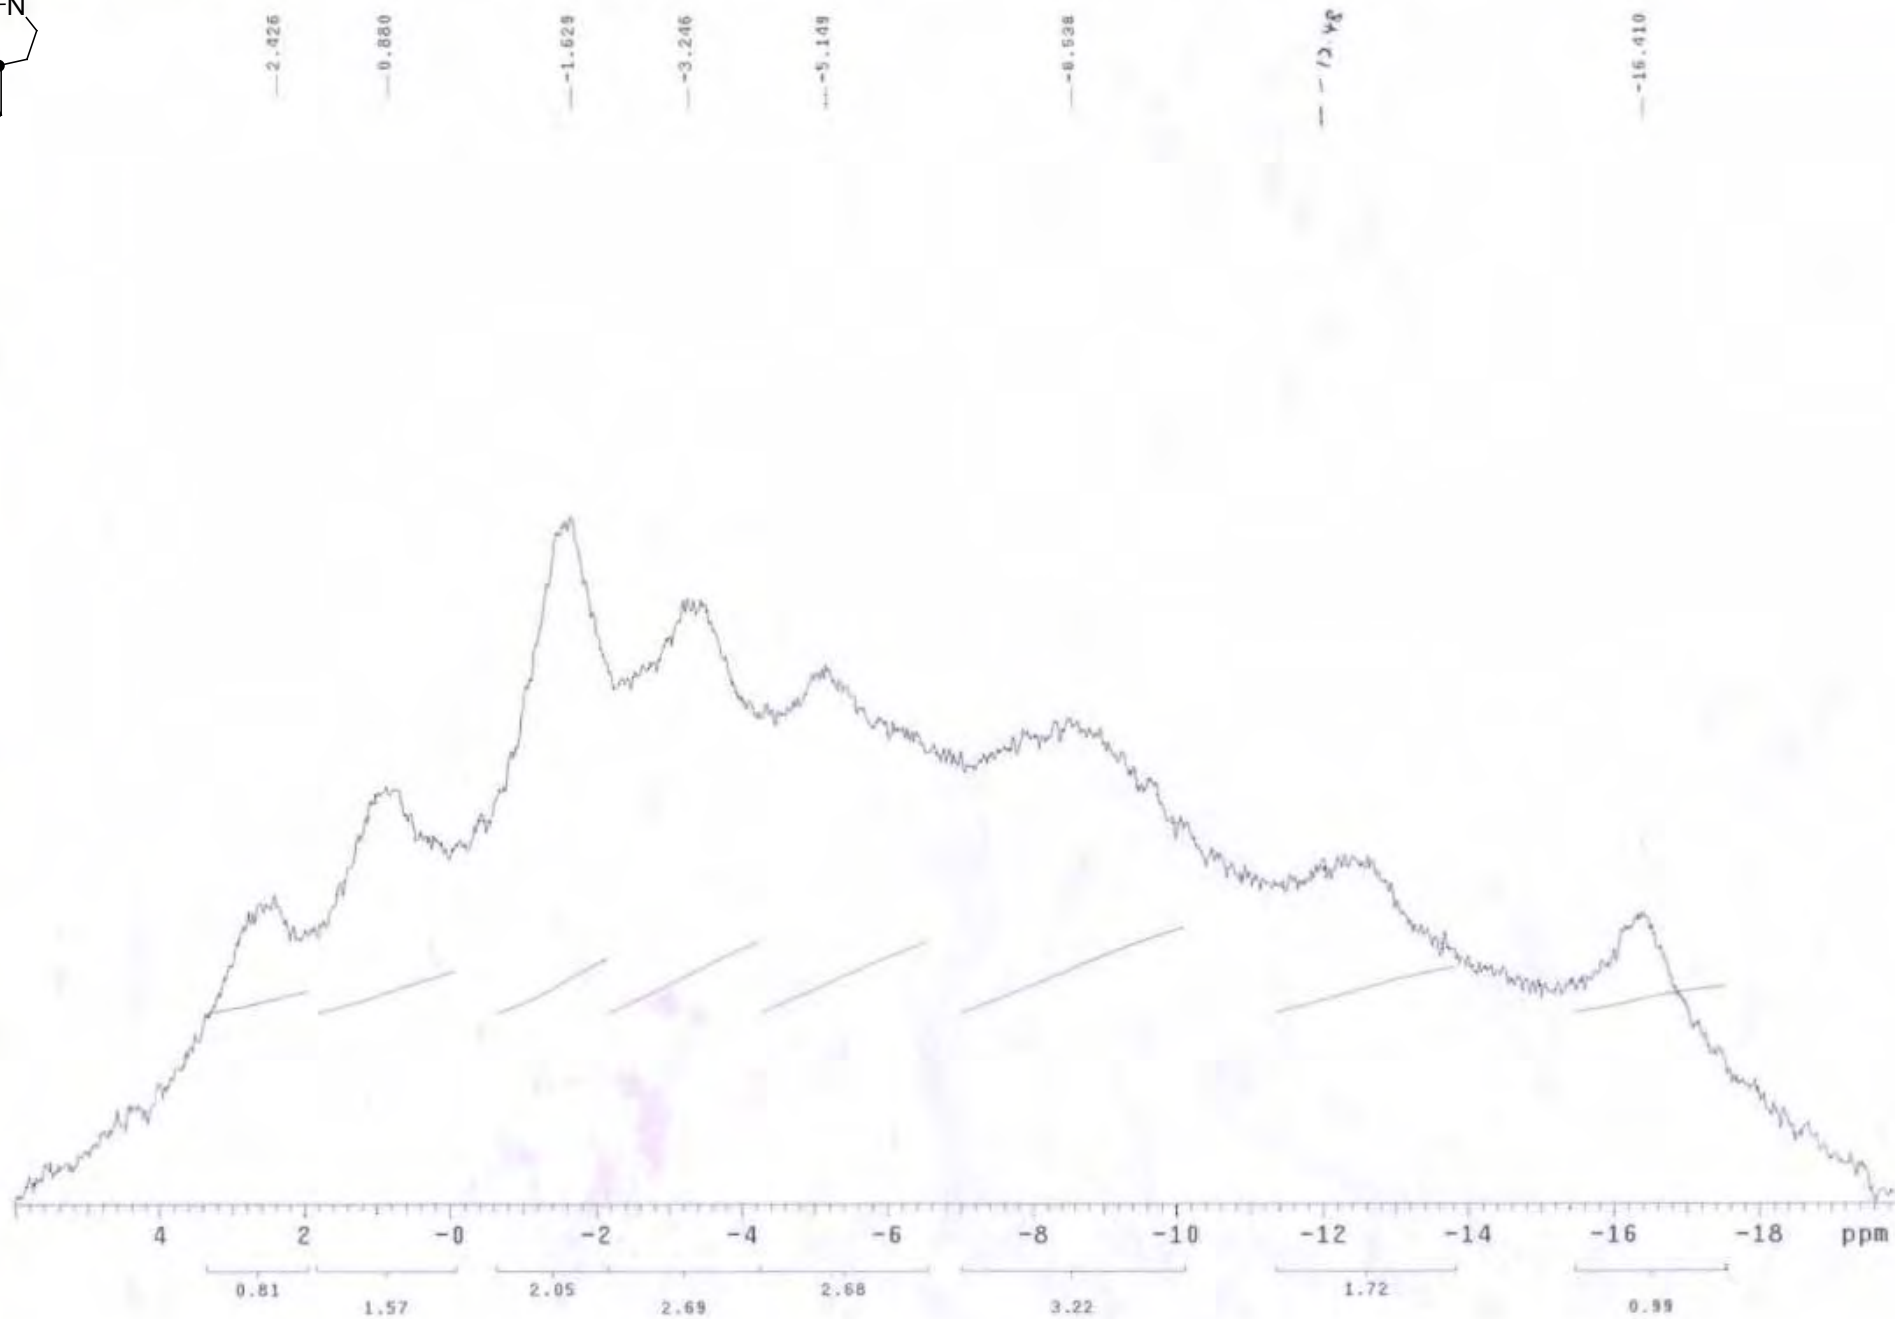

ib5 + 4. schjrn dlt

STANDARD 1H OBSERVE

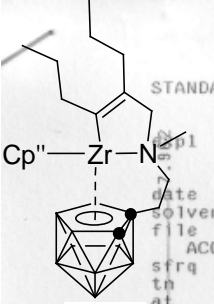

2b

s2pu1  
 date Jul 5 2007  
 solvent cdc13  
 file exp  
 ACQUISITION  
 sfrq 399.952  
 th H1  
 at 3.750  
 np 75008  
 sw 10000.0  
 fb 6000  
 bs 16  
 tpwr 57  
 pw 5.0  
 d1 0  
 tof 1000.0  
 nt 8  
 ct 8  
 alock n  
 gain 48  
 FLAGS  
 il n  
 in n  
 dp y  
 hs nn  
 DISPLAY  
 sp -106.4  
 wp 3387.7  
 vs 80  
 sc 0  
 wc 250  
 hzmm 13.55  
 is 173.23  
 rfl 4884.4  
 rfp 2859.6  
 th 3  
 ins 1.000  
 ai ph

DEC. & WT  
 399.951  
 H1  
 40  
 0  
 nnn  
 c  
 11790  
 1.0  
 n  
 PROCESSING  
 0.50  
 wtfile  
 proc ft  
 fn not used  
 math f

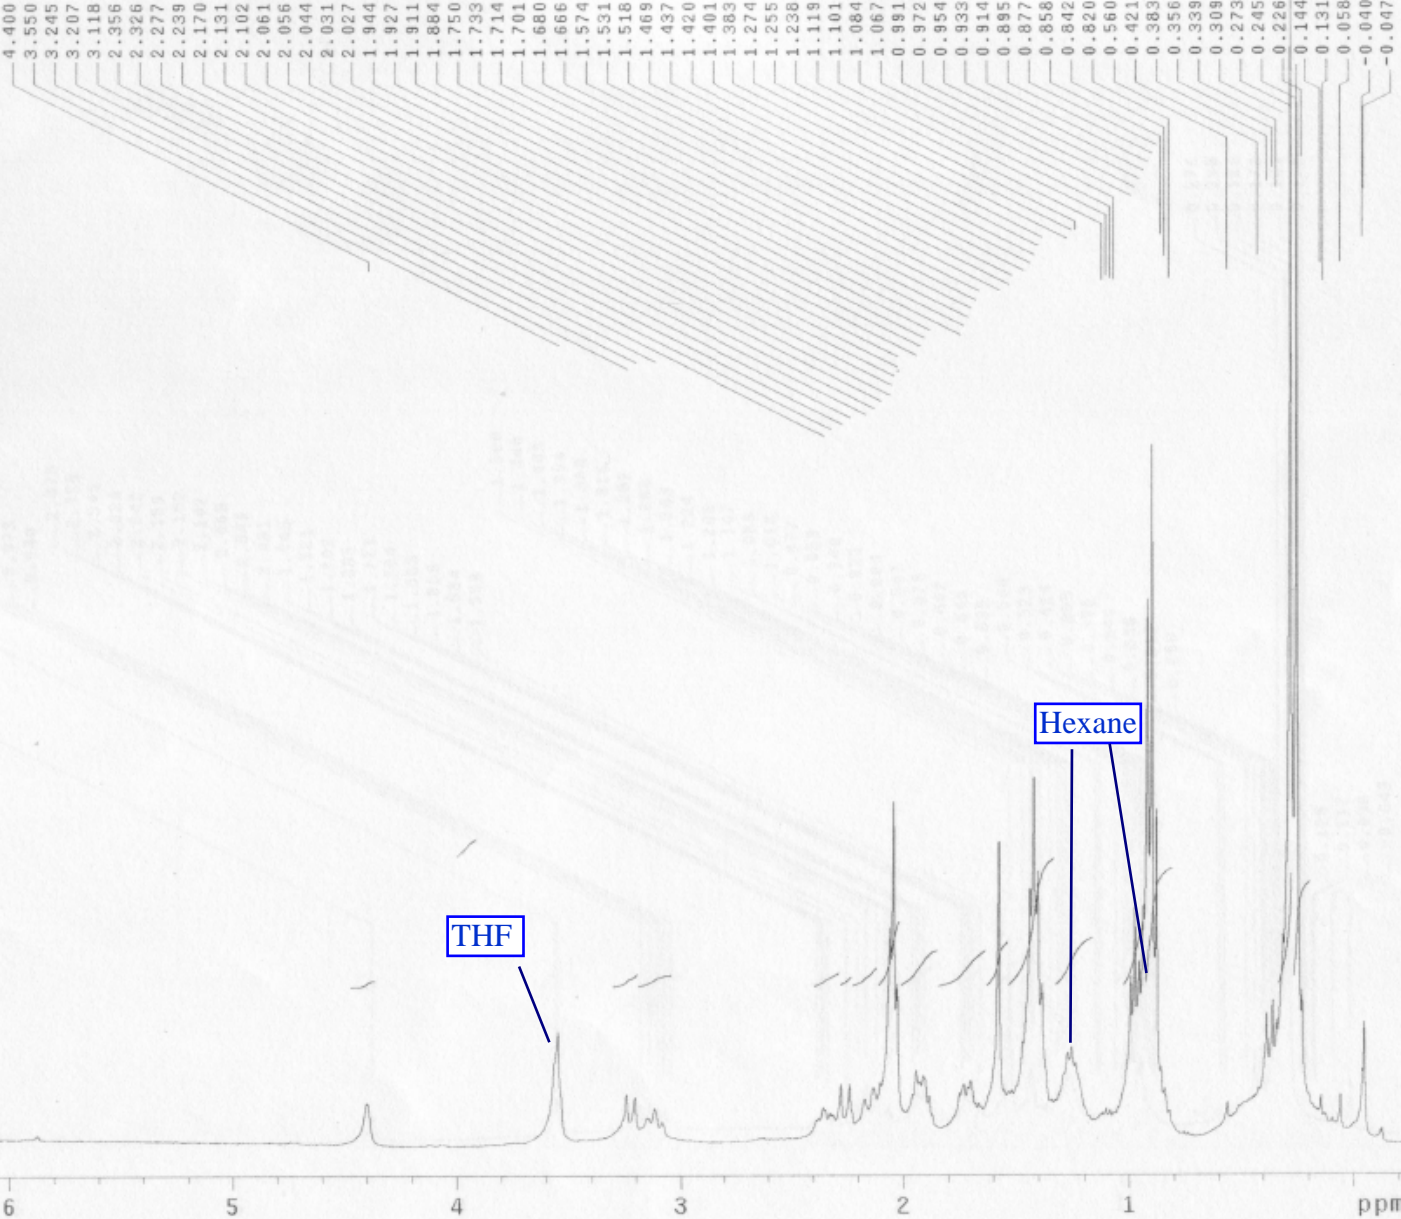

0.86 1.21 1.00 0.55 1.19 1.10 1.39 1.88 3.47 4.34 4.71 11.47 10.16 11.35

1b5 + 4-octyne

<sup>13</sup>C SENSITIVITY  
ASTM SAMPLE

exp1 s2pu1

|             |            |            |          |
|-------------|------------|------------|----------|
| SAMPLE      |            | DEC. & VT  |          |
| date        | Jul 5 2007 | dn         | H1       |
| solvent     | cdc13      | dof        | -500.0   |
| file        | exp        | dm         | nny      |
| ACQUISITION |            | dmm        | w        |
| sfrq        | 100.577    | dmf        | 11500    |
| tn          | C13        | dpwr       | 40       |
| at          | 2.001      | PROCESSING |          |
| np          | 120024     | lb         | 5.00     |
| sw          | 29996.3    | fn         | 32768    |
| fb          | 17000      | math       | i        |
| bs          | 4          |            |          |
| pw          | 5.0        | werr       |          |
| pw          | 5.0        | wexp       |          |
| tpwr        | 52         | wbs        |          |
| d1          | 1.000      | wnt        |          |
| tof         | 0          | DISPLAY    |          |
| nt          | 20000      | sp         | -682.8   |
| ct          | 1540       | wp         | 20806.8  |
| alock       |            | n vs       | 7098     |
| gain        | 60         | sc         | 0        |
| FLAGS       |            | wc         | 250      |
| il          | n          | hzmm       | 83.23    |
| in          | n          | is         | 12222.45 |
| dp          | y          | rfl        | 5481.7   |
| hs          | nn         | rfp        | 0        |
|             |            | th         | 9        |
|             |            | ins        | 1.000    |
|             |            | ai         | ph       |

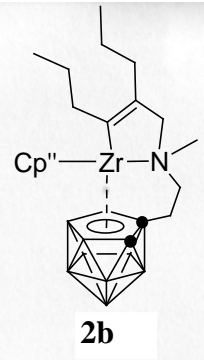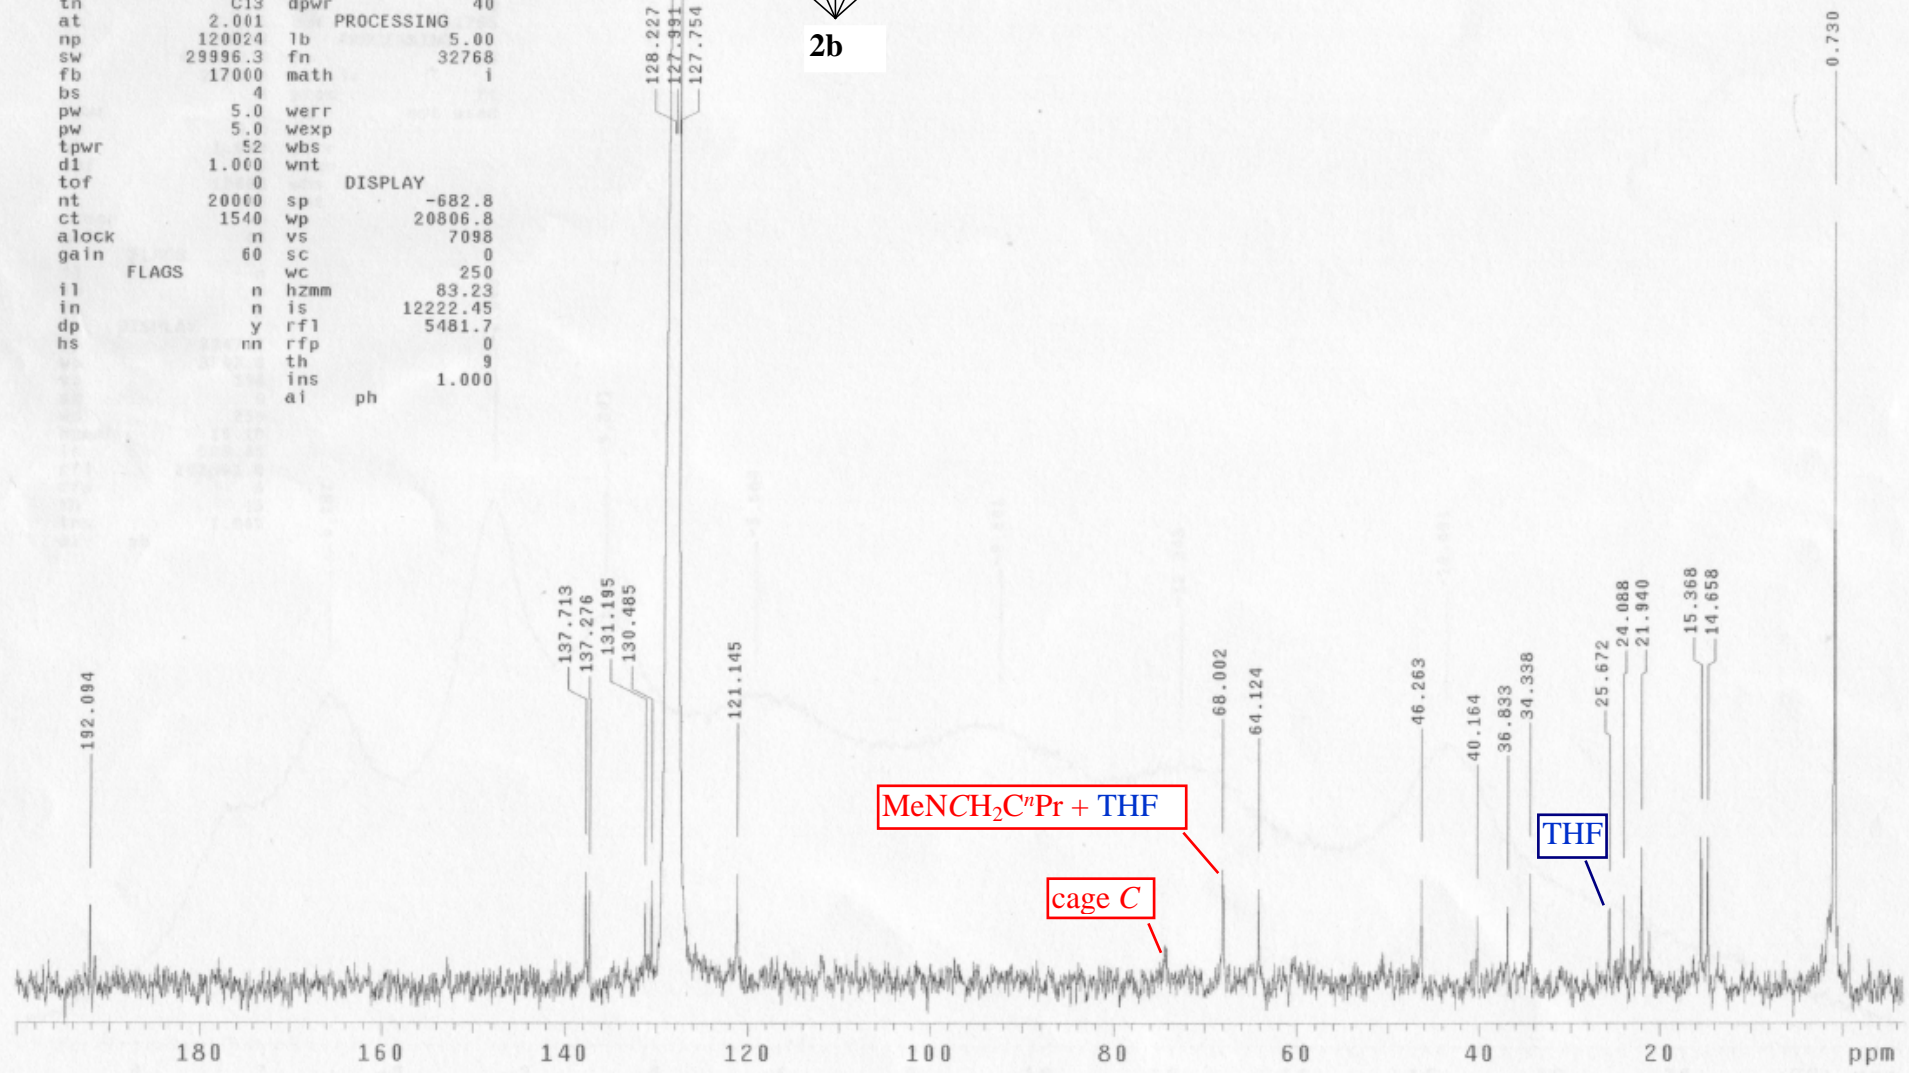



165 + 4-octyne dbz

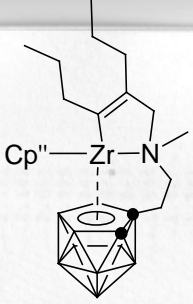

2b

STANDARD 1H OBSERVE

exp1 s2pu1

|             |            |           |          |
|-------------|------------|-----------|----------|
| SAMPLE      |            | DEC. & VT |          |
| date        | Jul 5 2007 | dfrq      | 399.951  |
| solvent     | CDC13      | dn        | H1       |
| file        | exp        | dpwr      | 40       |
| ACQUISITION |            |           |          |
| sfrq        | 128.317    | dof       | 0        |
| tn          | B11        | dm        | yyy      |
| at          | 0.655      | dmm       | g        |
| np          | 524288     | dmf       | 11765    |
| PROCESSING  |            |           |          |
| sw          | 400000.0   | lb        | 3.00     |
| fb          | 220000     | wtfile    |          |
| bs          | 4          | proc      | ft       |
| tpwr        | 52         | fn        | not used |
| pw          | 5.0        |           |          |
| d1          | 1.000      | werr      |          |
| tof         | 0          | wexp      |          |
| nt          | 10000      | wbs       |          |
| ct          | 40         | wnt       |          |
| alock       | n          |           |          |
| gain        | 40         |           |          |

FLAGS

il n  
in n  
dp y

DISPLAY

|      |          |
|------|----------|
| sp   | -3047.2  |
| wp   | 3797.9   |
| vs   | 196      |
| sc   | 0        |
| wc   | 250      |
| hzmm | 15.19    |
| is   | 500.00   |
| rfl  | 202861.8 |
| rfl  | 0        |
| th   | 13       |
| ins  | 1.000    |
| ai   | ph       |

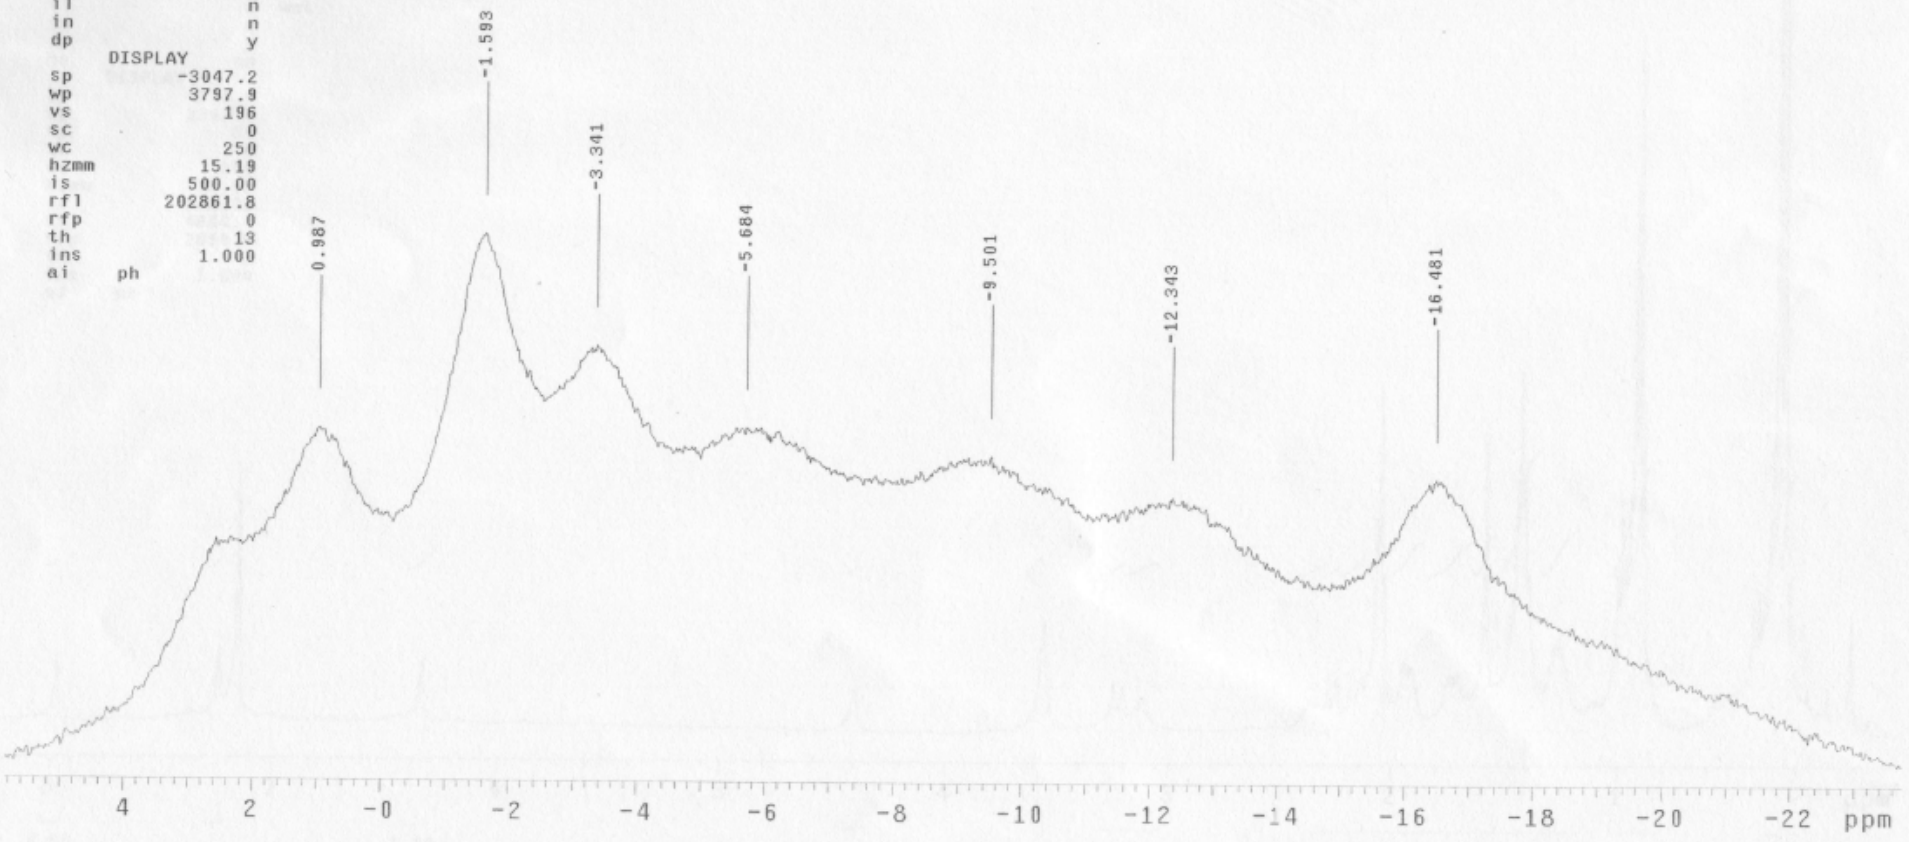

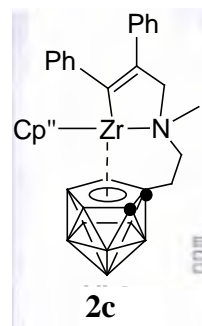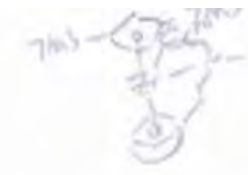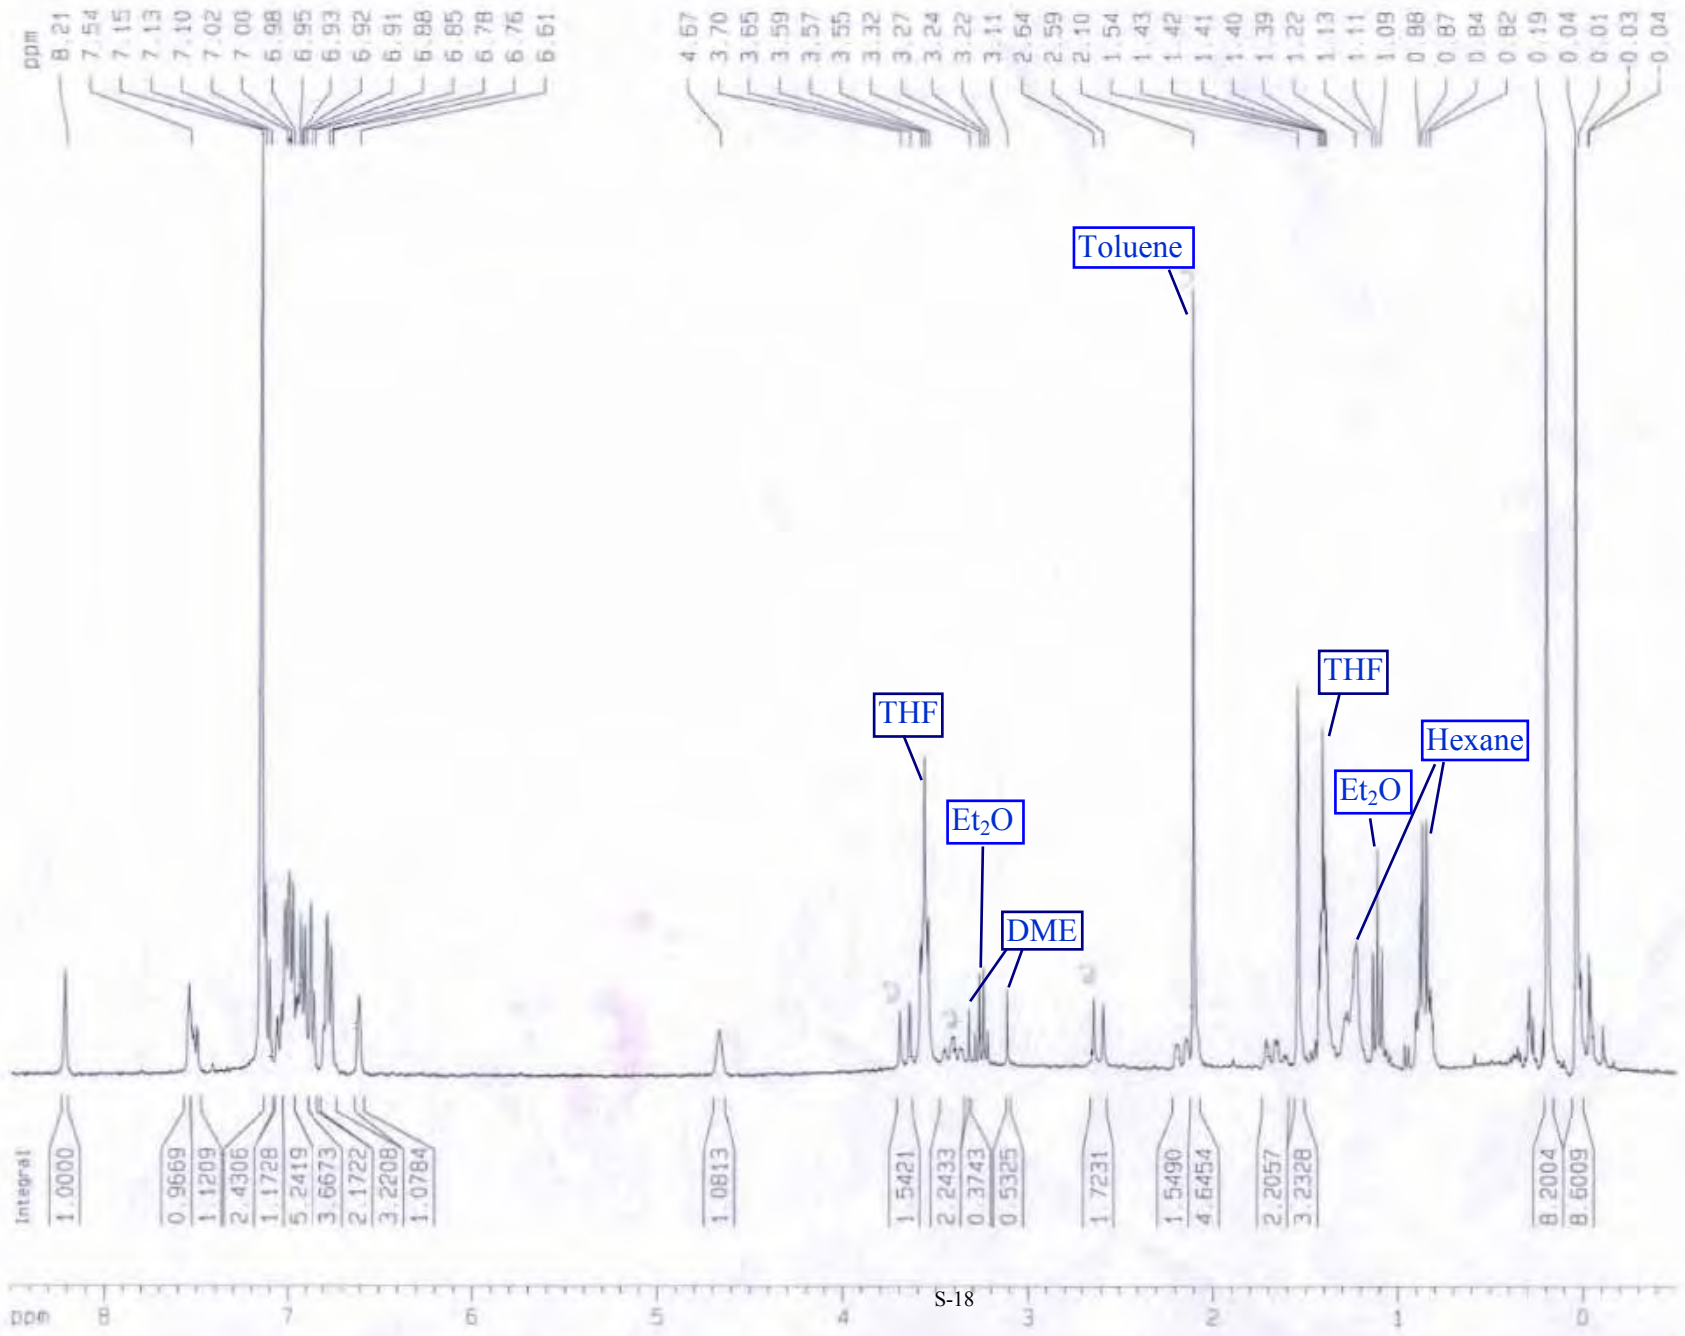

Current Data Parameters  
 NAME 061030-1  
 EXPNO 3  
 PROCNO 1

F2 - Acquisition Parameters  
 Date\_ 20061031  
 Time 10.19  
 INSTRUM dpx300  
 PROBHD 5 mm BBO BB-1H  
 PULPROG zg  
 TD 32768  
 SOLVENT C6D6  
 NS 16  
 DS 0  
 SWH 8992.806 Hz  
 FIDRES 0.274439 Hz  
 AQ 1.8219508 sec  
 RG 352  
 DW 55.600 usec  
 DE 79.43 usec  
 TE 0.0 K  
 D1 1.00000000 sec  
 MCREST 0.00000000 sec  
 MCWRK 0.01500000 sec

\*\*\*\*\* CHANNEL f1 \*\*\*\*\*  
 NUC1 1H  
 P1 5.00 usec  
 PL1 -2.00 dB  
 SF01 300.1312000 MHz

F2 - Processing parameters  
 SI 32768  
 SF 300.1300349 MHz  
 WDW EM  
 SSB 0  
 LB 0.30 Hz  
 GB 0  
 PC 1.00

1D NMR plot parameters  
 CX 22.00 cm  
 CY 24.00 cm  
 F1P 8.500 ppm  
 F1 2551.11 Hz  
 F2P -0.500 ppm  
 F2 -150.07 Hz  
 PPMCM 0.40909 ppm/cm  
 HZCM 122.78047 Hz/cm

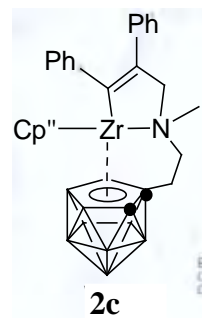

ppm

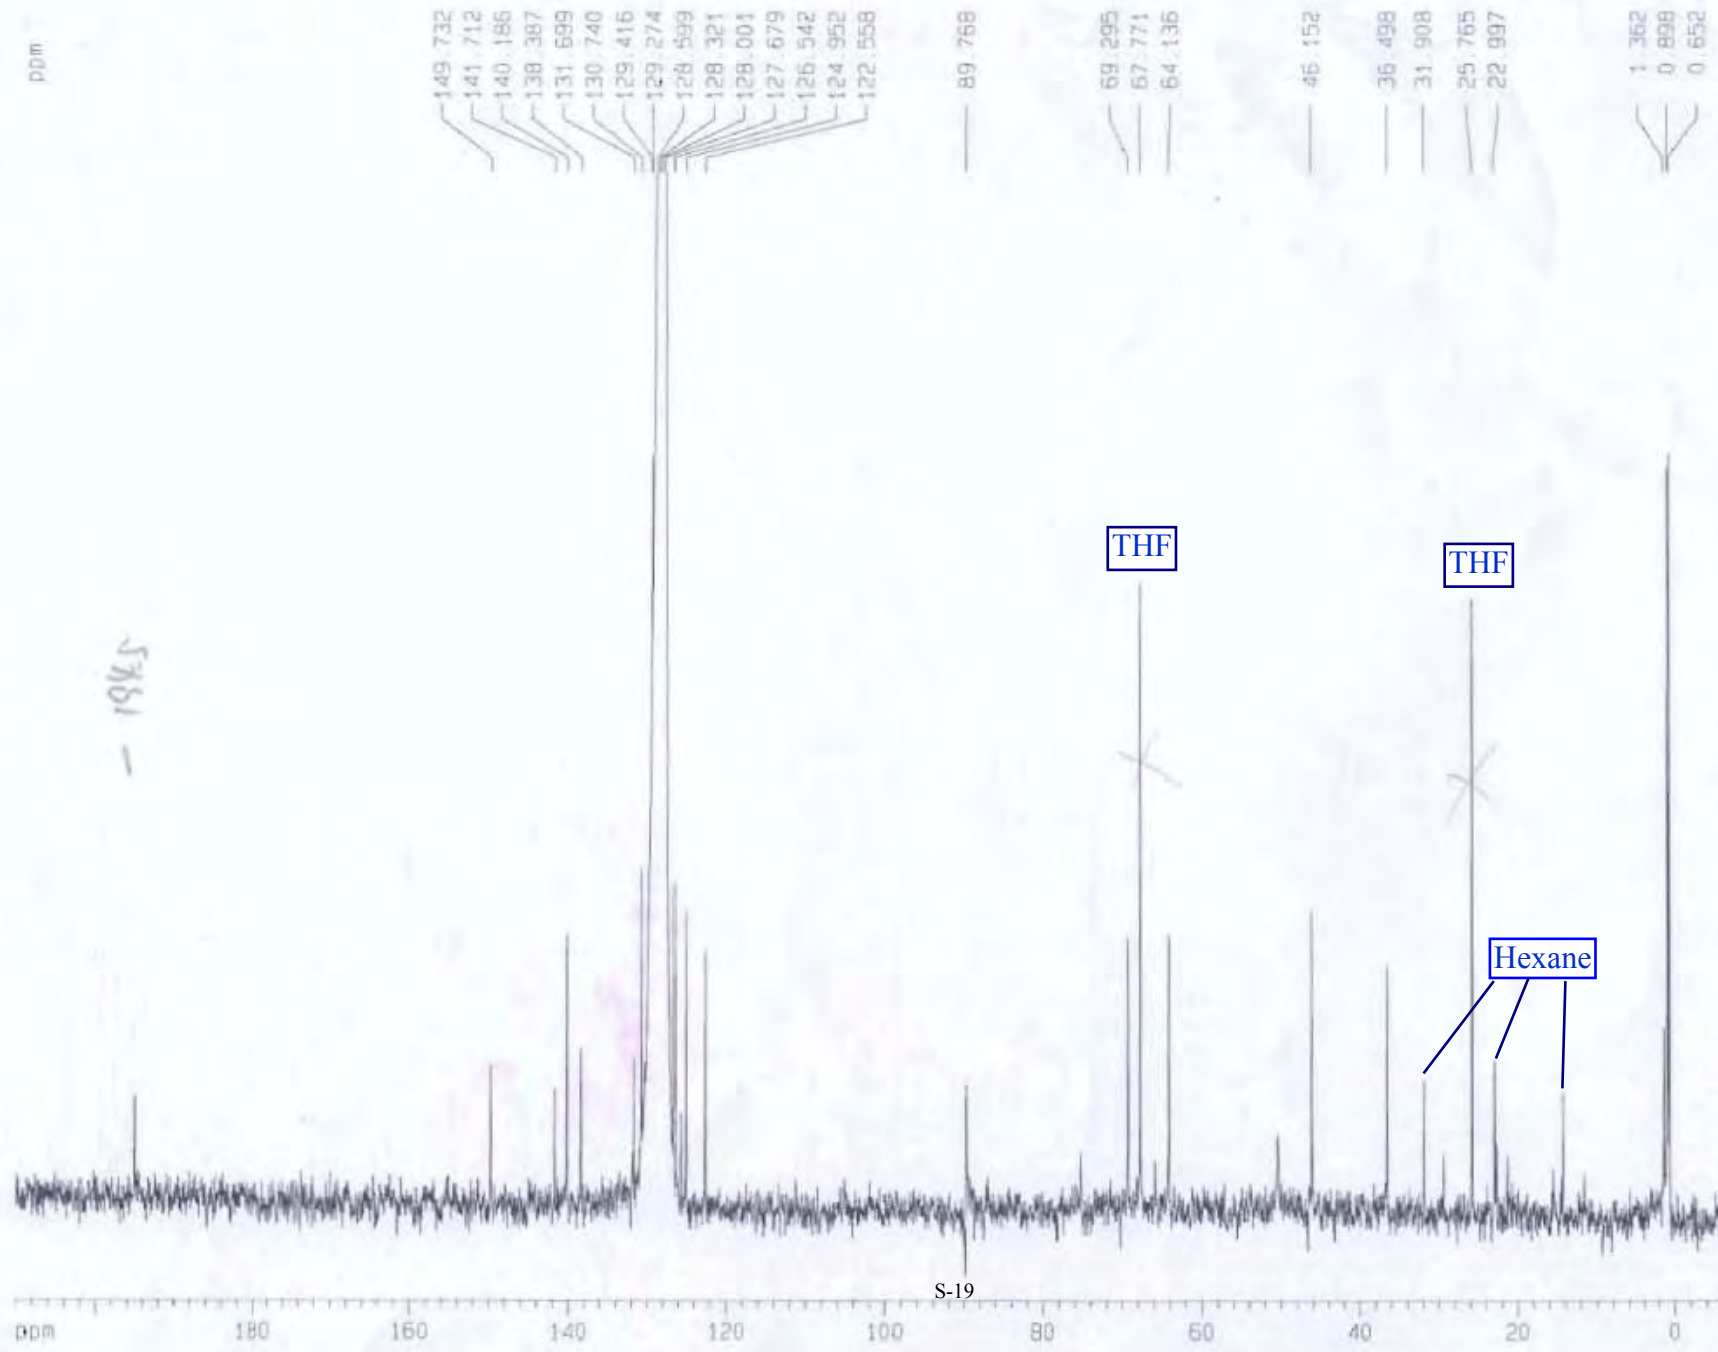

C13

Current Data Parameters  
 NAME 165-Ph2C2-C  
 EXPNO 1  
 PROCNO 1

F2 - Acquisition Parameters  
 Date\_ 20070220  
 Time 16.49  
 INSTRUM dpz300  
 PROBHD 5 mm BBO BB-1H  
 PULPROG zgpg30  
 TD 65536  
 SOLVENT CDCl3  
 NS 24030  
 DS 0  
 SWH 22675.736 Hz  
 FIDRES 0.346004 Hz  
 AQ 1.445188 sec  
 RG 8192  
 DW 22.050 usec  
 DE 5.00 usec  
 TE 0.0 K  
 O1 1.0000000 sec  
 d11 0.0300000 sec  
 MCREST 0.0000000 sec  
 MCWRK 0.01500000 sec

----- CHANNEL f1 -----  
 NUC1 13C  
 P1 3.00 usec  
 PL1 -6.00 dB  
 SFO1 75.4745111 MHz

----- CHANNEL f2 -----  
 CPDPRG2 waltz16  
 NUC2 1H  
 PCPD2 100.00 usec  
 PL2 120.00 dB  
 PL12 19.00 dB  
 SFO2 300.1315007 MHz

F2 - Processing parameters  
 SI 65536  
 SF 75.4677338 MHz  
 WDW EM  
 SSB 0  
 LB 3.00 Hz  
 GB 0  
 PC 1.40

1D NMR plot parameters  
 CX 23.00 cm  
 CY 698.47 cm  
 F1P 210.000 ppm  
 F1 15848.22 Hz  
 F2P -10.000 ppm  
 F2 -754.68 Hz  
 PPMCM 9.56522 ppm/cm  
 HZCM 721.86530 Hz/cm

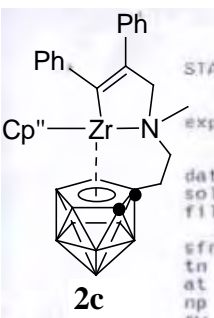

STANDARD 1H OBSERVE

```

exp1 s2pu1
SAMPLE
date Nov 1 2006 dfrq 399.951
solvent CDCl3 dn H1
file exp dpwr 40
ACQUISITION dof 0
sfrq 128.317 dm YYY
tn 811 dmm g
at 0.655 dmf 11765
np 524288 PROCESSING
sw 400000.0 lb 3.00
fb 220000 wtfile
bs 4 proc ft
tpwr 52 fn not used
pw 5.0
d1 1.000 werr
tof 0 wexp
nt 10000 wbs
ct 68 wnt
alock n
gain 40
FLAGS
l1 n
ln n
dp Y
DISPLAY
sp -2558.8
wp 3872.7
vs 511
sc 0
wc 250
hzmm 15.49
is 1566.47
rf1 202697.0
rfp 0
th 6
ins 1.000
al ph
  
```

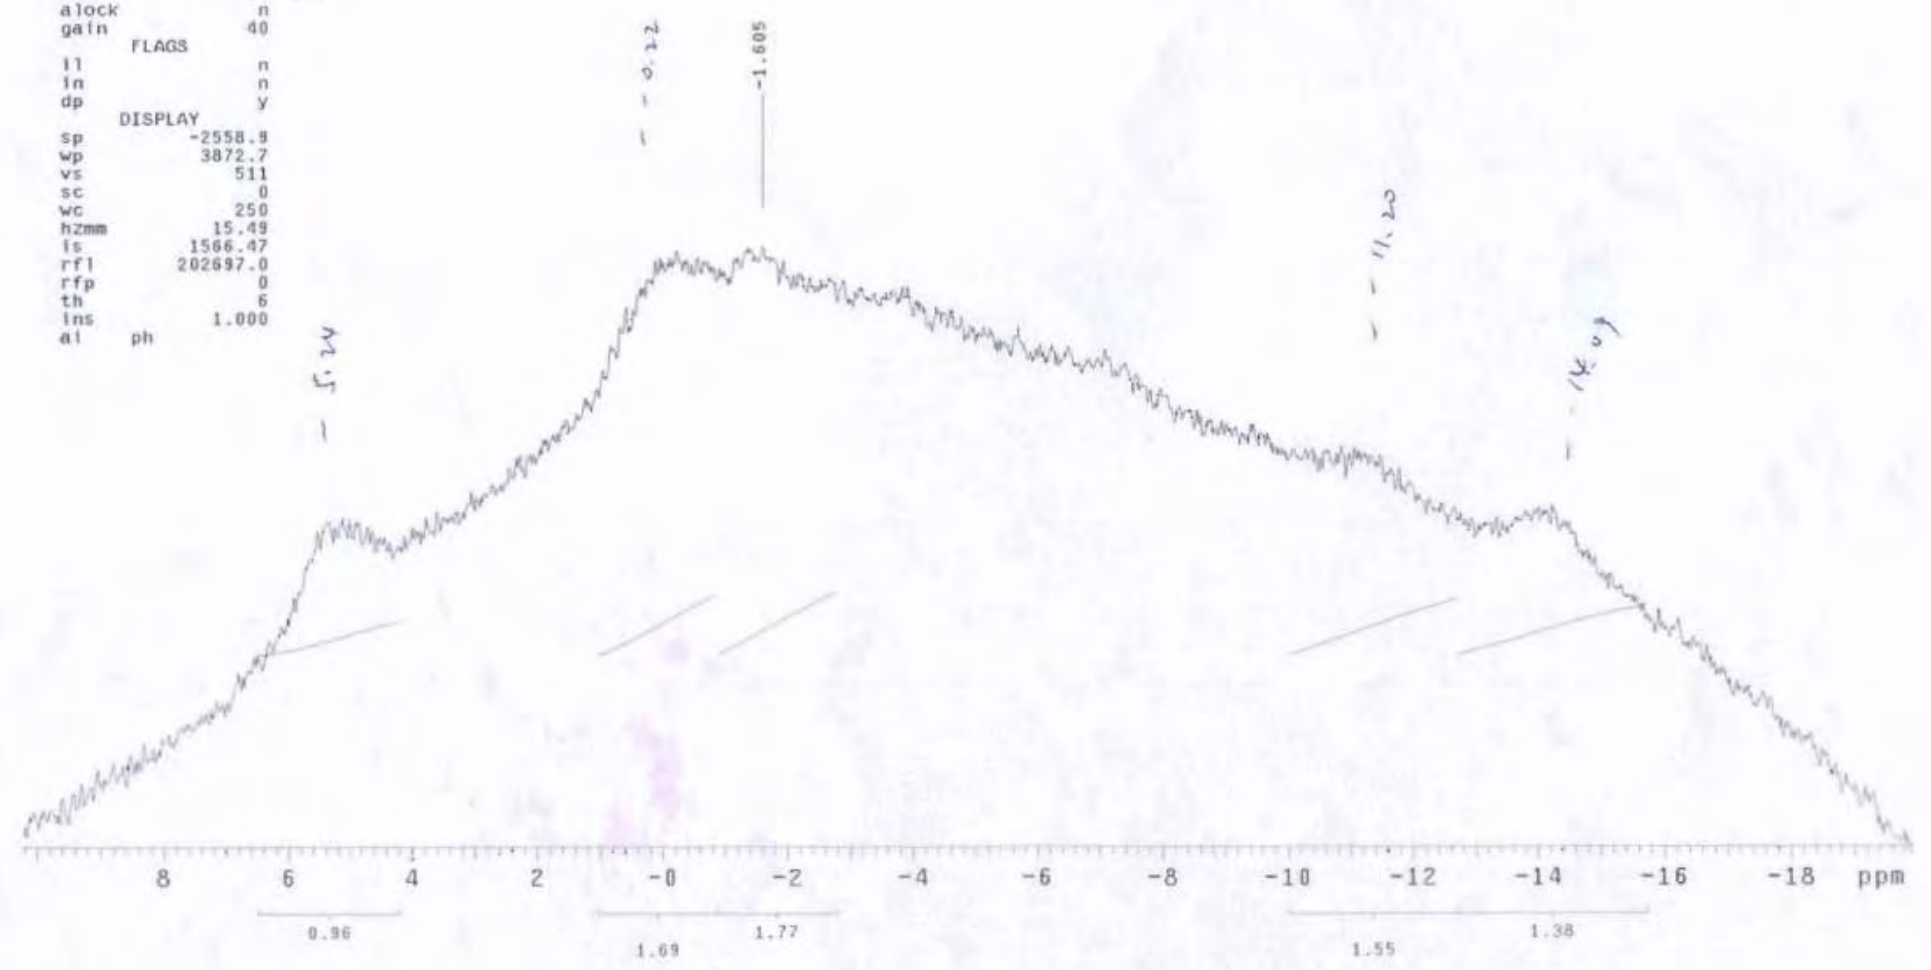

1b5 + PhC≡CMW - H

STANDARD 1H OBSERVE

Pulse Sequence: s2pu1

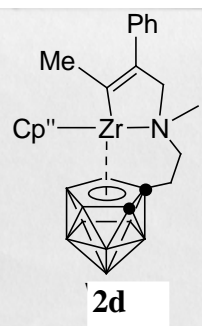

2d

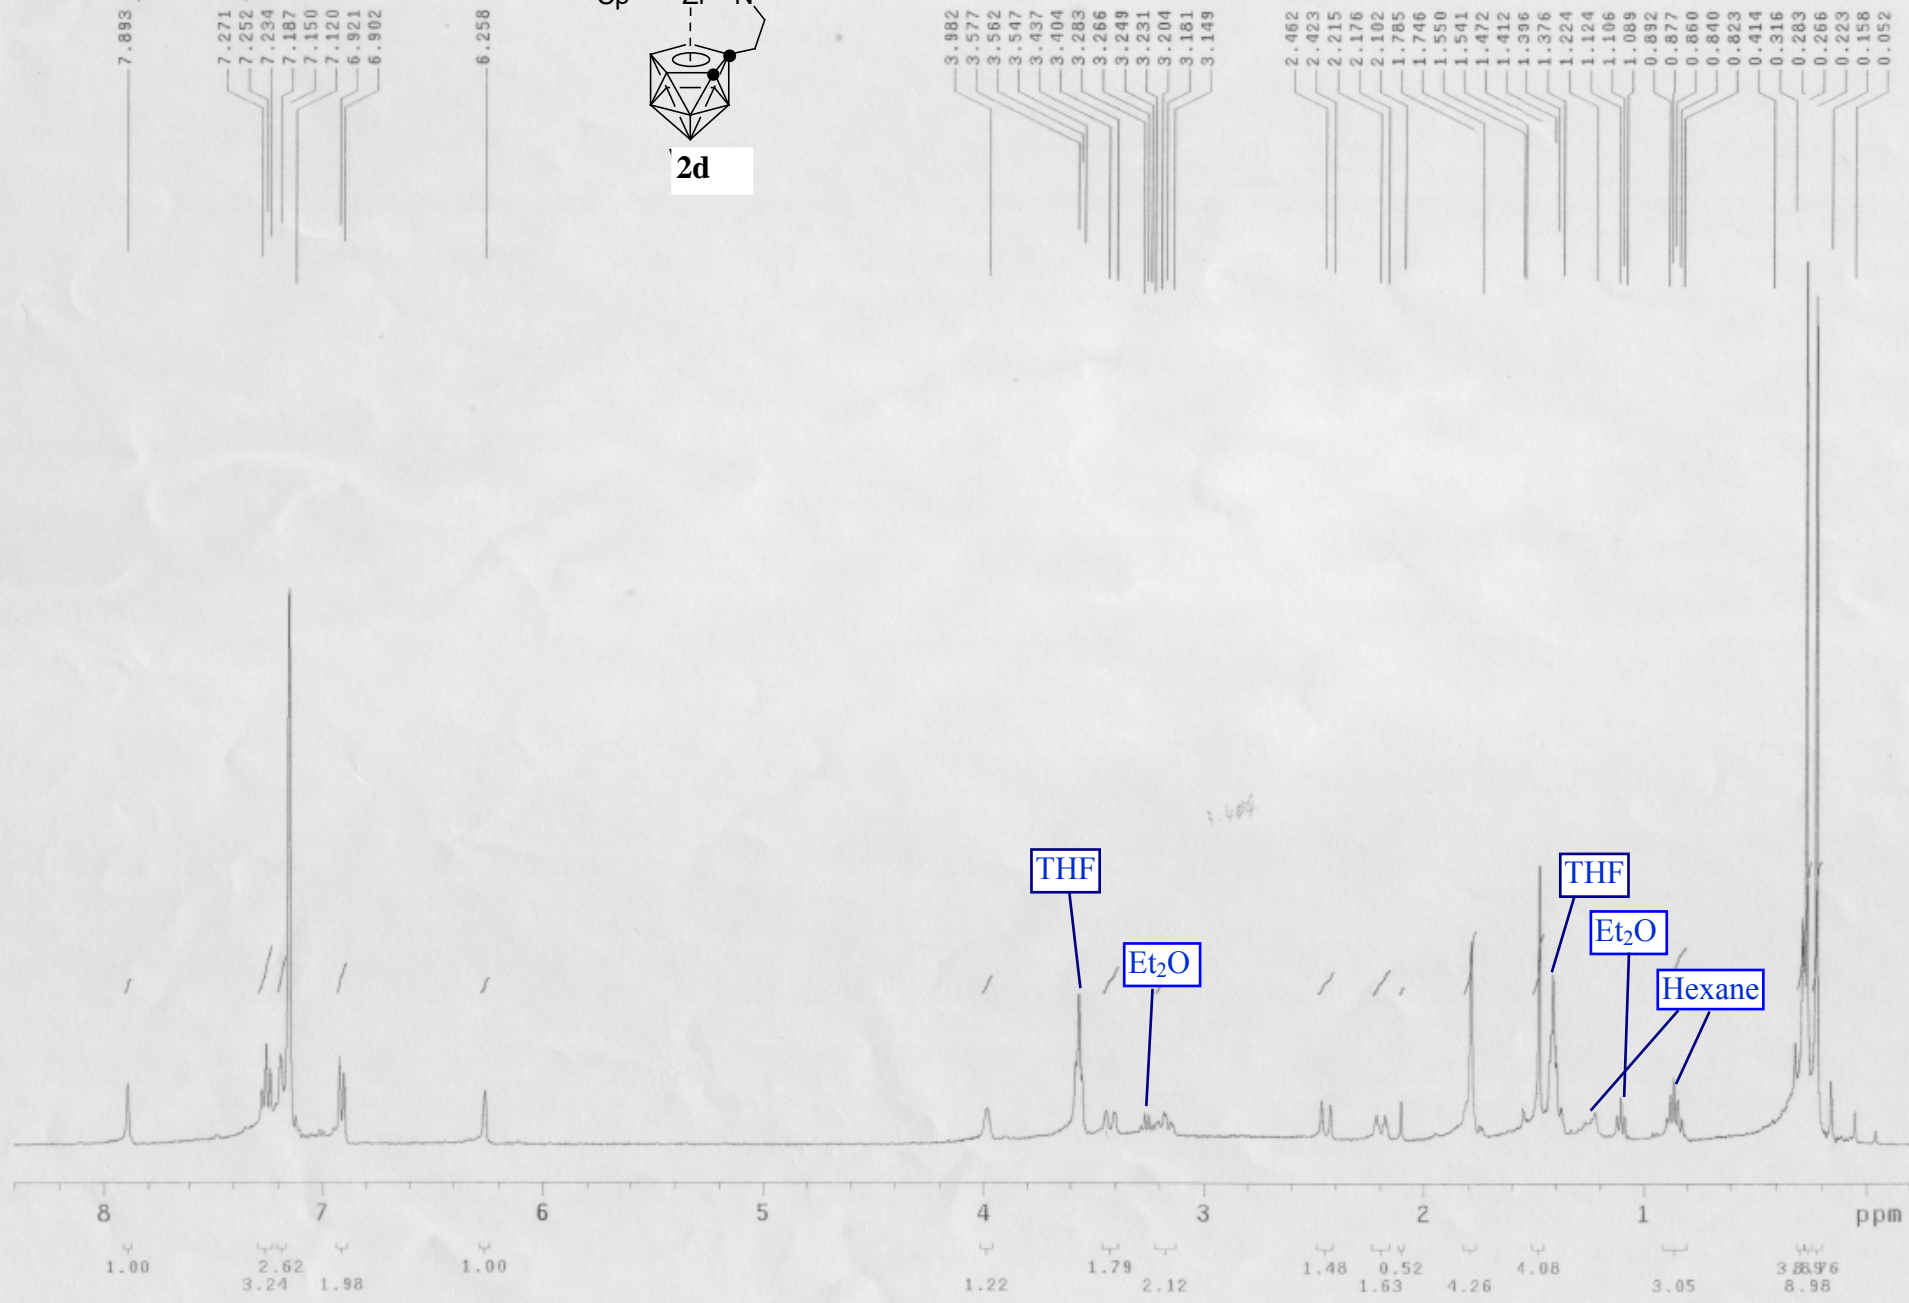

165+PhCCMe-C13

Pulse Sequence: s2pu1

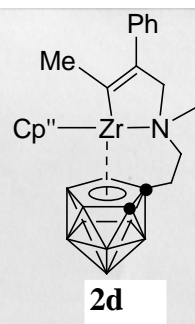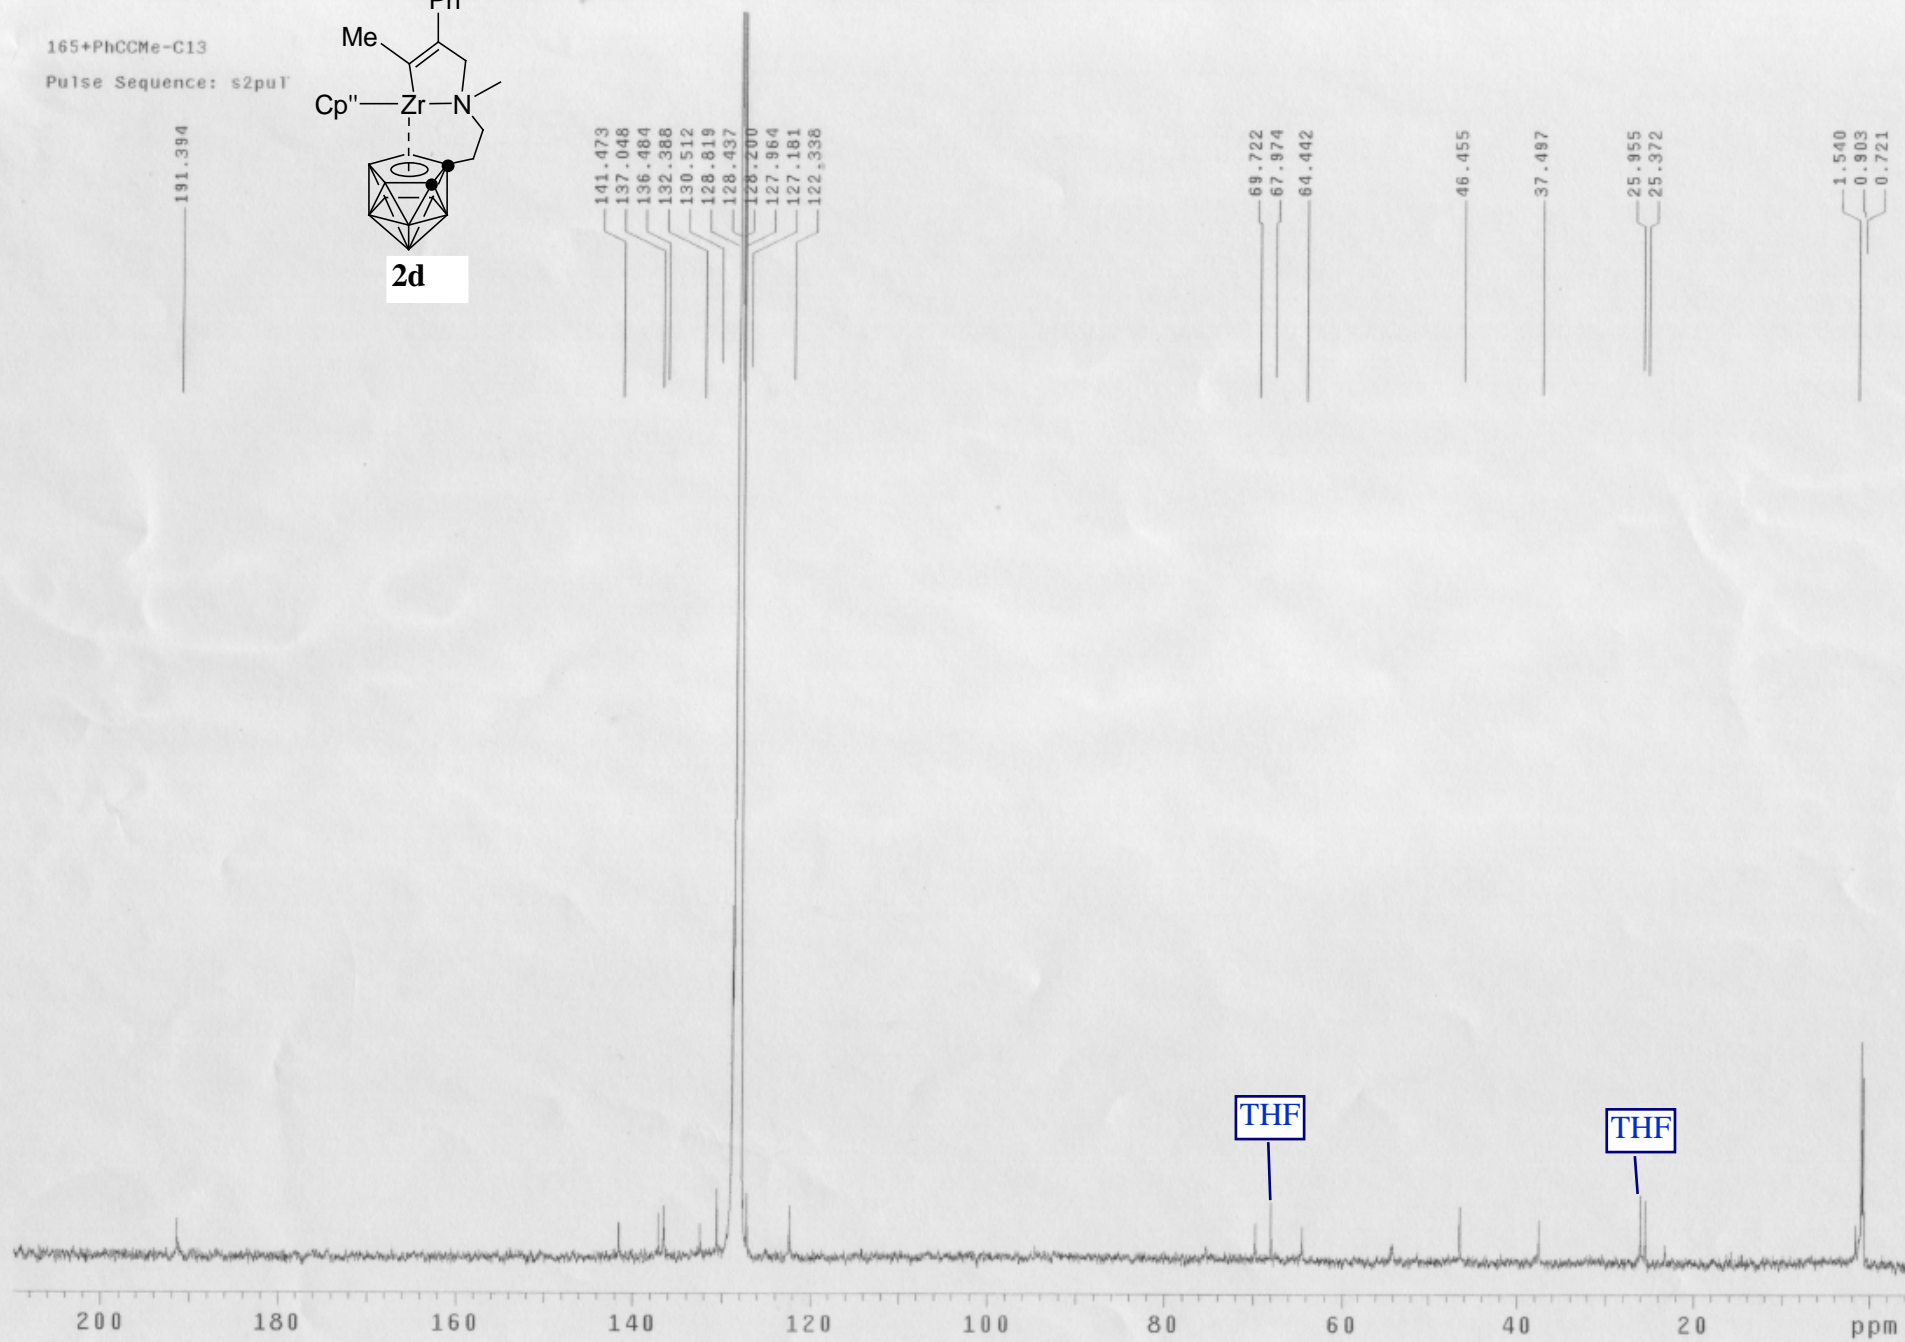

165+PhCCMe-B11

Pulse Sequence: s2pu1

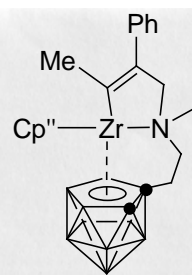

**2d**

—2.259  
—0.14  
—1.486  
—3.330  
—5.839  
—6.617  
—9.870  
—16.303

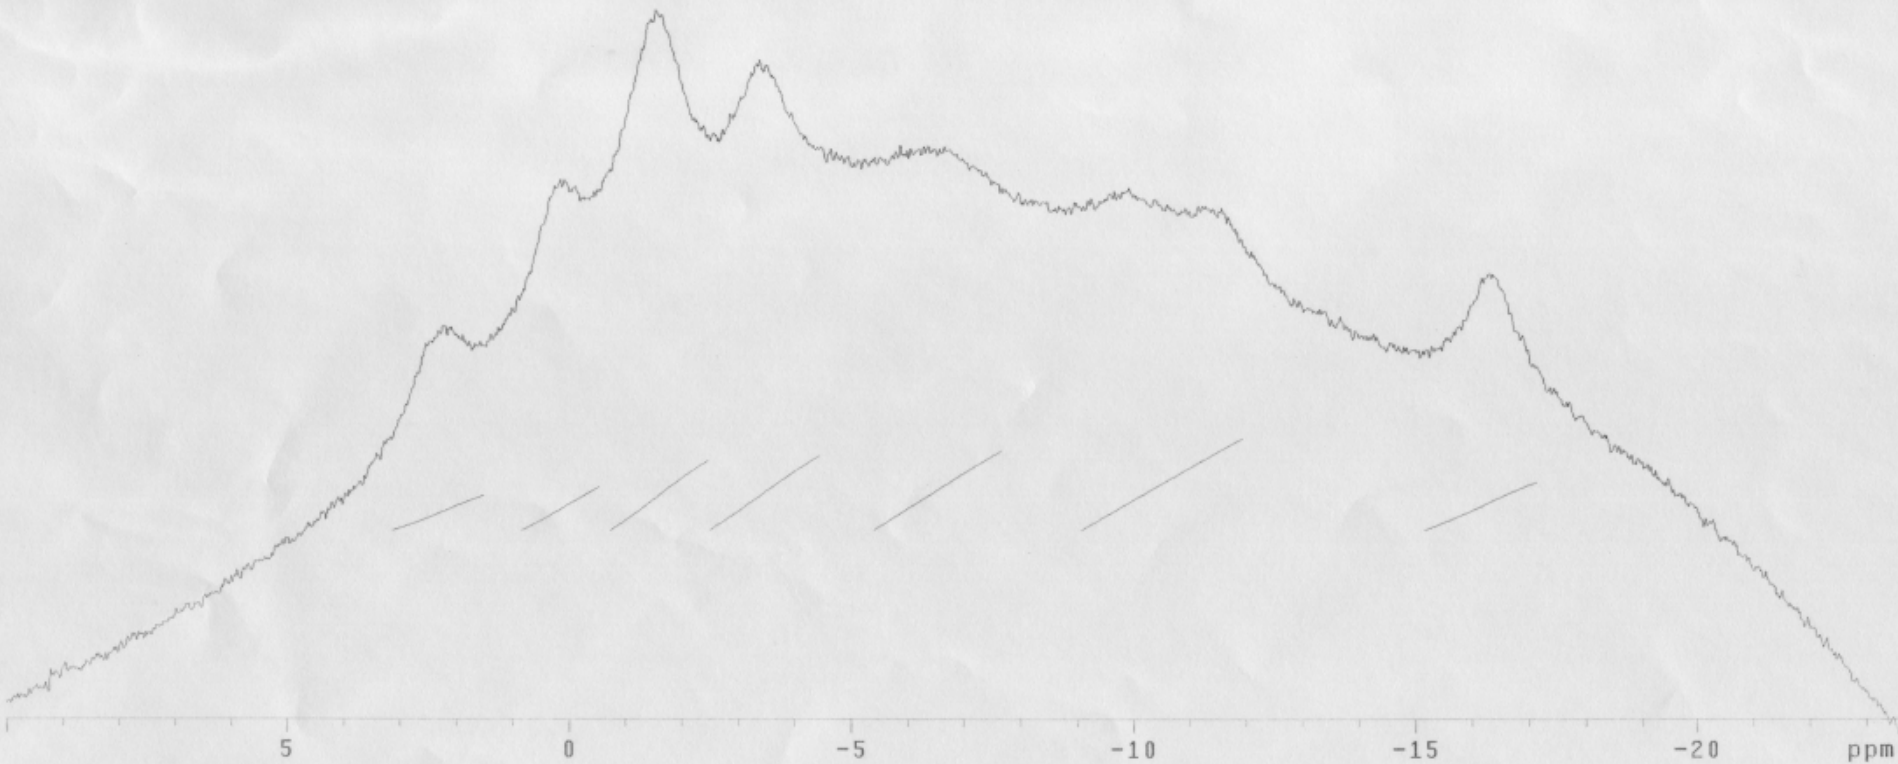

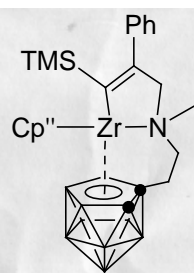

2e

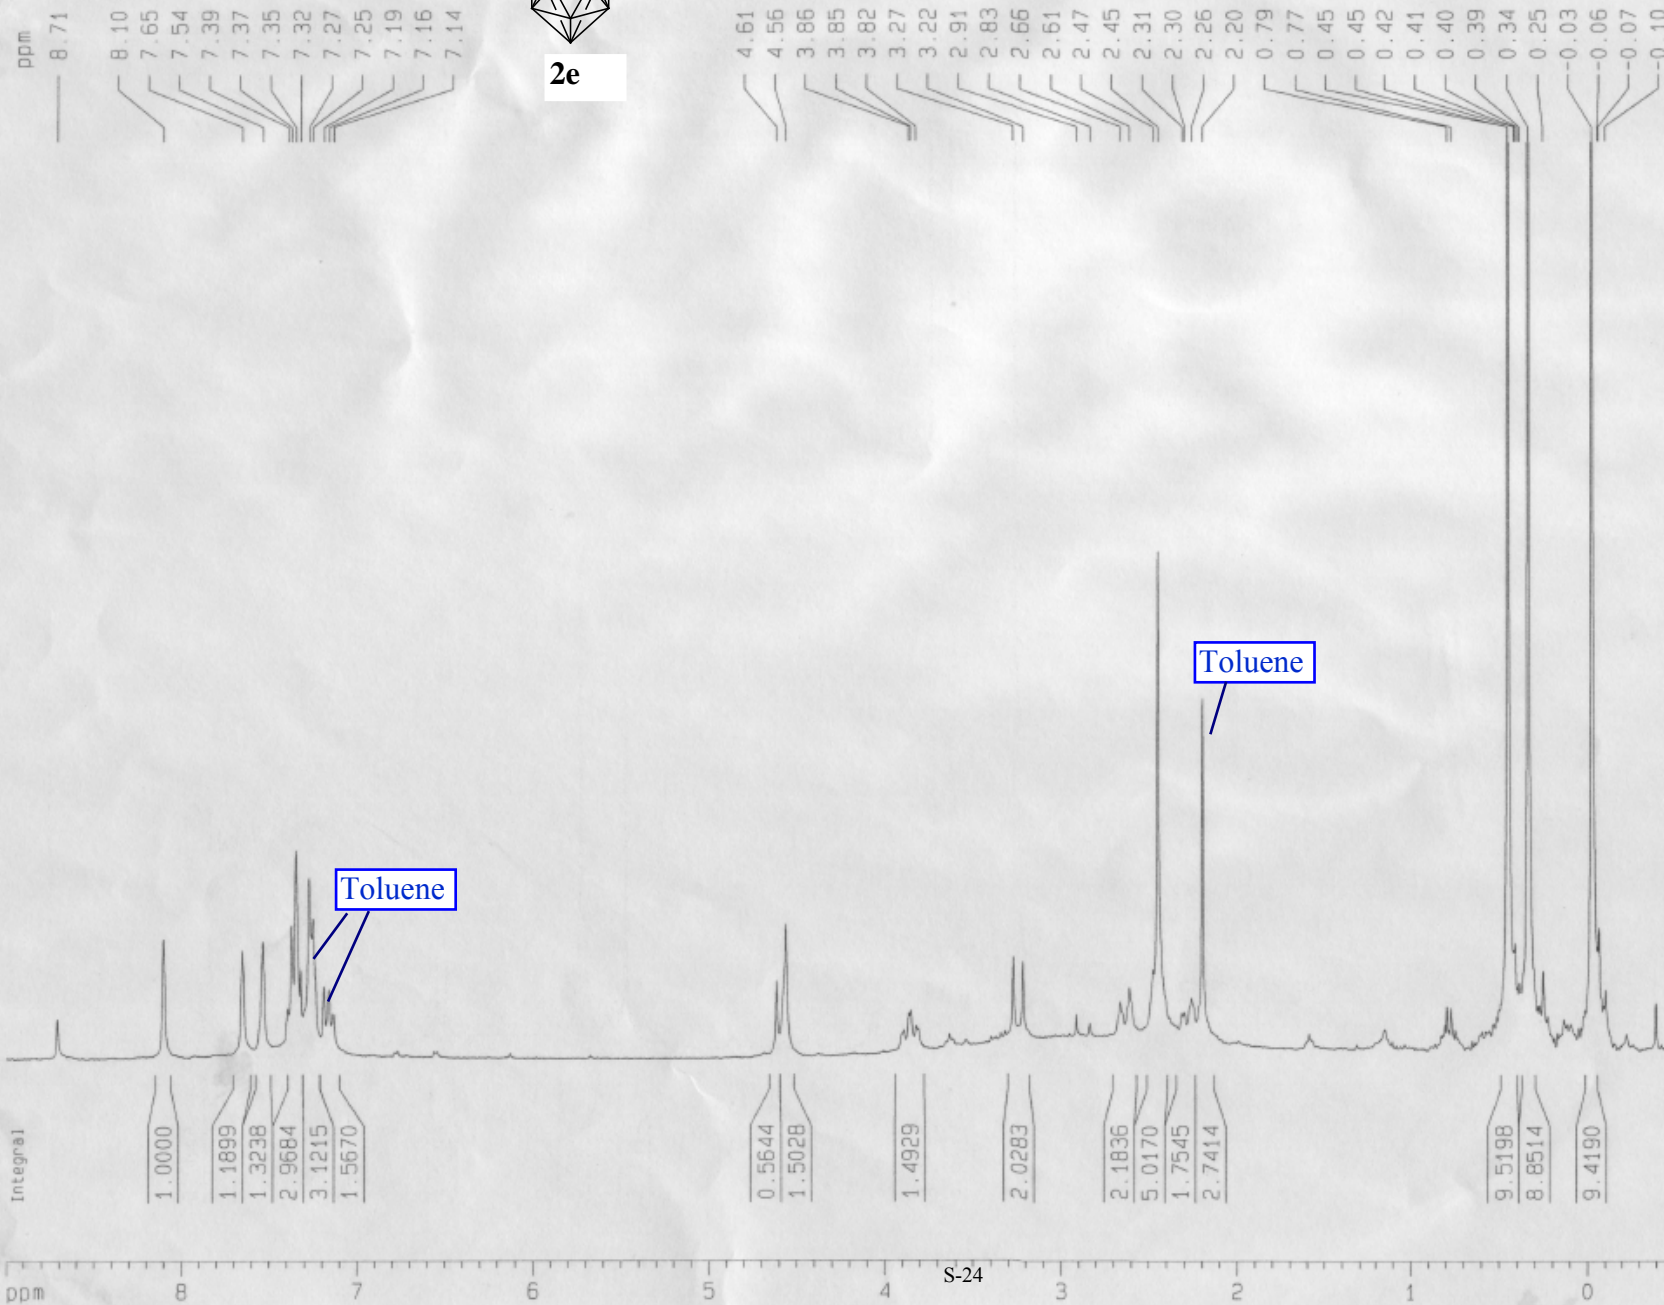

1b5 + PhC=C7ms

Current Data Parameters

NAME 2  
EXPNO 1  
PROCNO 1

F2 - Acquisition Parameters

Date\_ 20070625  
Time 20.50  
INSTRUM dpx300  
PROBHD 5 mm 880 BB-1H  
PULPROG zg  
TD 32768  
SOLVENT Pyr  
NS 16  
DS 0  
SWH 10804.971 Hz  
FIDRES 0.329742 Hz  
AQ 1.5163893 sec  
RG 256  
DW 46.275 usec  
DE 66.11 usec  
TE 0.0 K  
D1 1.00000000 sec  
MCREST 0.00000000 sec  
MCWAK 0.01500000 sec

===== CHANNEL f1 =====

NUC1 1H  
P1 5.00 usec  
PL1 -2.00 dB  
SFO1 300.1312000 MHz

F2 - Processing parameters

SI 32768  
SF 300.1299972 MHz  
WDW EM  
SSB 0  
LB 0.30 Hz  
GB 0  
PC 1.00

1D NMR plot parameters

CX 22.00 cm  
CY 24.00 cm  
F1P 9.000 ppm  
F1 2701.17 Hz  
F2P -0.500 ppm  
F2 -150.07 Hz  
PPMCM 0.43182 ppm/cm  
HZCM 129.60159 Hz/cm



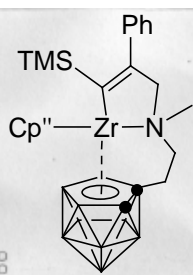

2e

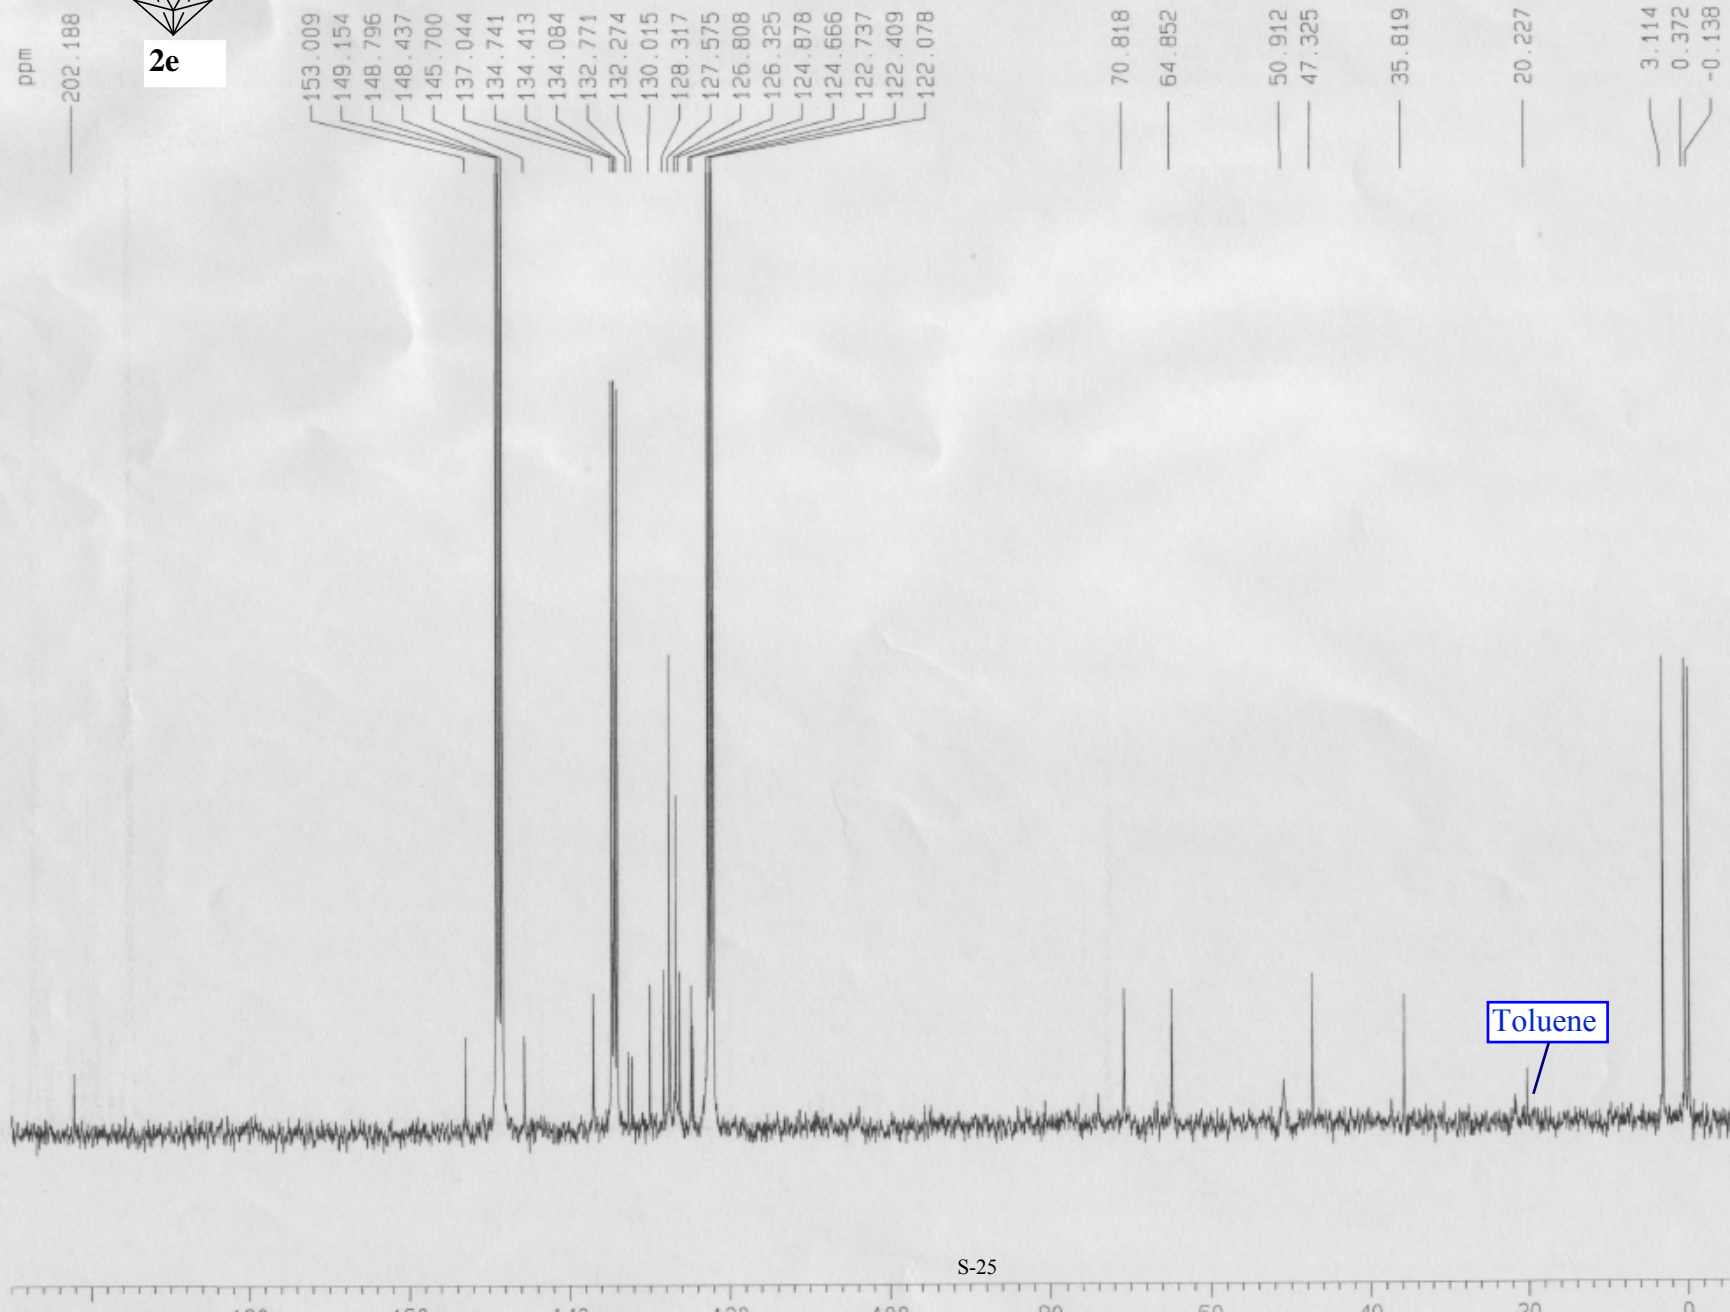

153.009  
149.154  
148.796  
148.437  
145.700  
137.044  
134.741  
134.413  
134.084  
132.771  
132.274  
130.015  
128.317  
127.575  
126.808  
126.325  
124.878  
124.666  
122.737  
122.409  
122.078

70.818  
64.852  
50.912  
47.325  
35.819  
20.227

3.114  
0.372  
-0.138

Current Data Parameters  
NAME 165+PhCCTMS-C13  
EXPNO 1  
PROCNO 1

F2 - Acquisition Parameters  
Date\_ 20070626  
Time 8.00  
INSTRUM dpx300  
PROBHD 5 mm BBO BB-1H  
PULPROG zgpg  
TD 65536  
SOLVENT CDC13  
NS 2375  
DS 0  
SWH 22675.736 Hz  
FIDRES 0.346004 Hz  
AQ 1.4451188 sec  
RG 8192  
DW 22.050 usec  
DE 6.00 usec  
TE 0.0 K  
D1 1.00000000 sec  
d11 0.03000000 sec  
MCREST 0.00000000 sec  
MCWRK 0.01500000 sec

===== CHANNEL f1 =====  
NUC1 13C  
P1 3.00 usec  
PL1 -6.00 dB  
SF01 75.4745111 MHz

===== CHANNEL f2 =====  
CPDPRG2 waltz16  
NUC2 1H  
PCPD2 100.00 usec  
PL2 120.00 dB  
PL12 19.00 dB  
SF02 300.1315007 MHz

F2 - Processing parameters  
SI 65536  
SF 75.4677053 MHz  
WDW EM  
SSB 0  
LB 3.00 Hz  
GB 0  
PC 1.40

1D NMR plot parameters  
CX 23.00 cm  
CY 19.18 cm  
F1P 210.000 ppm  
F1 15848.22 Hz  
F2P -10.000 ppm  
F2 -754.68 Hz  
PPMCM 9.56522 ppm/cm

165+PhCCTMS-B11  
Pulse Sequence: s2pu1

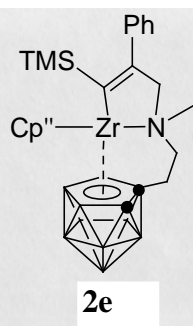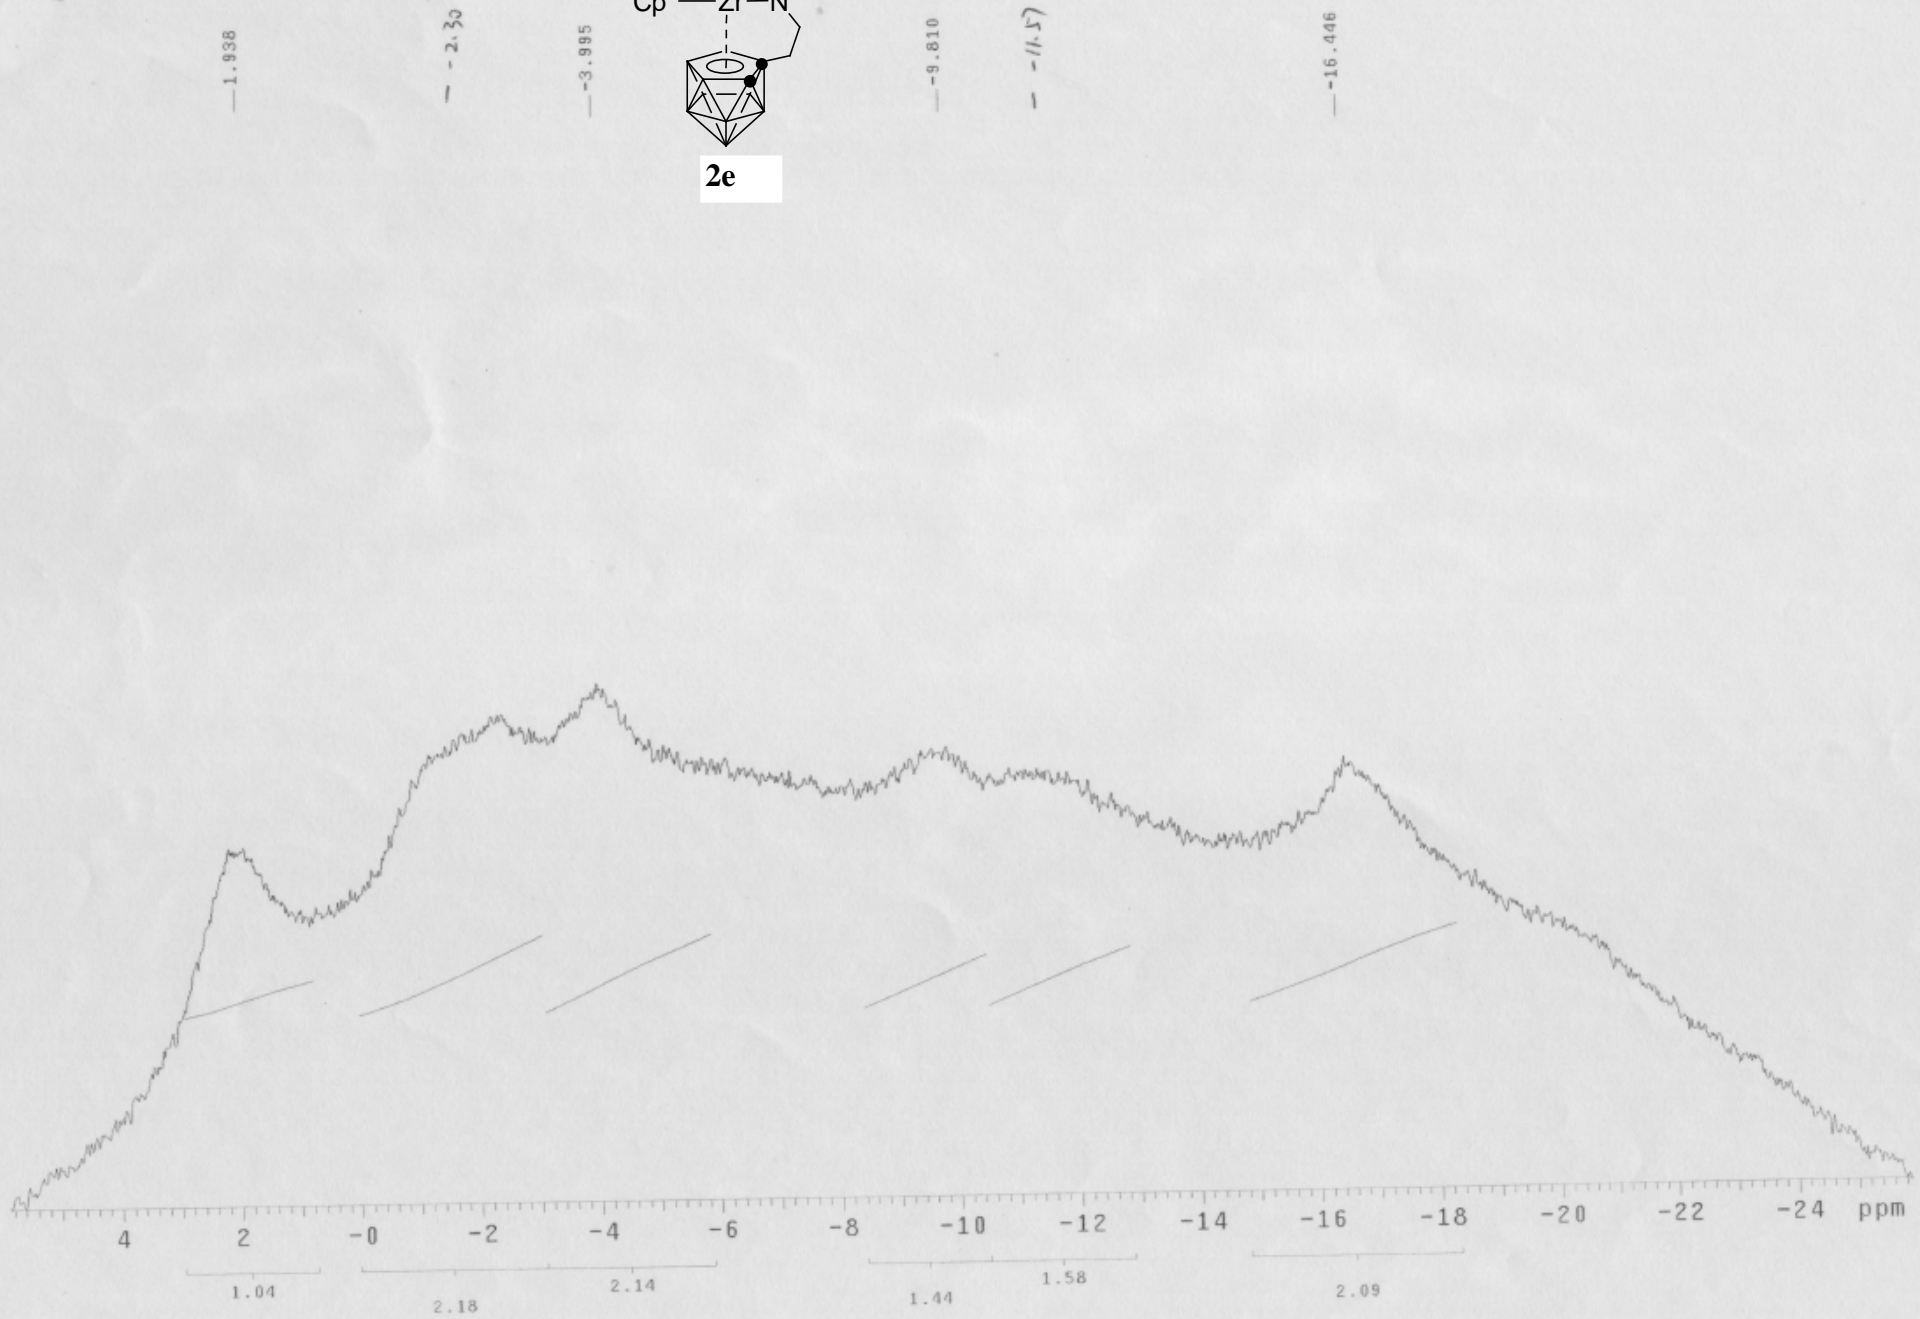

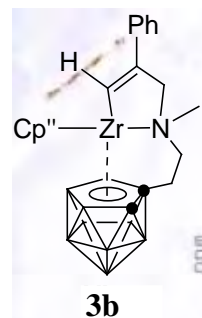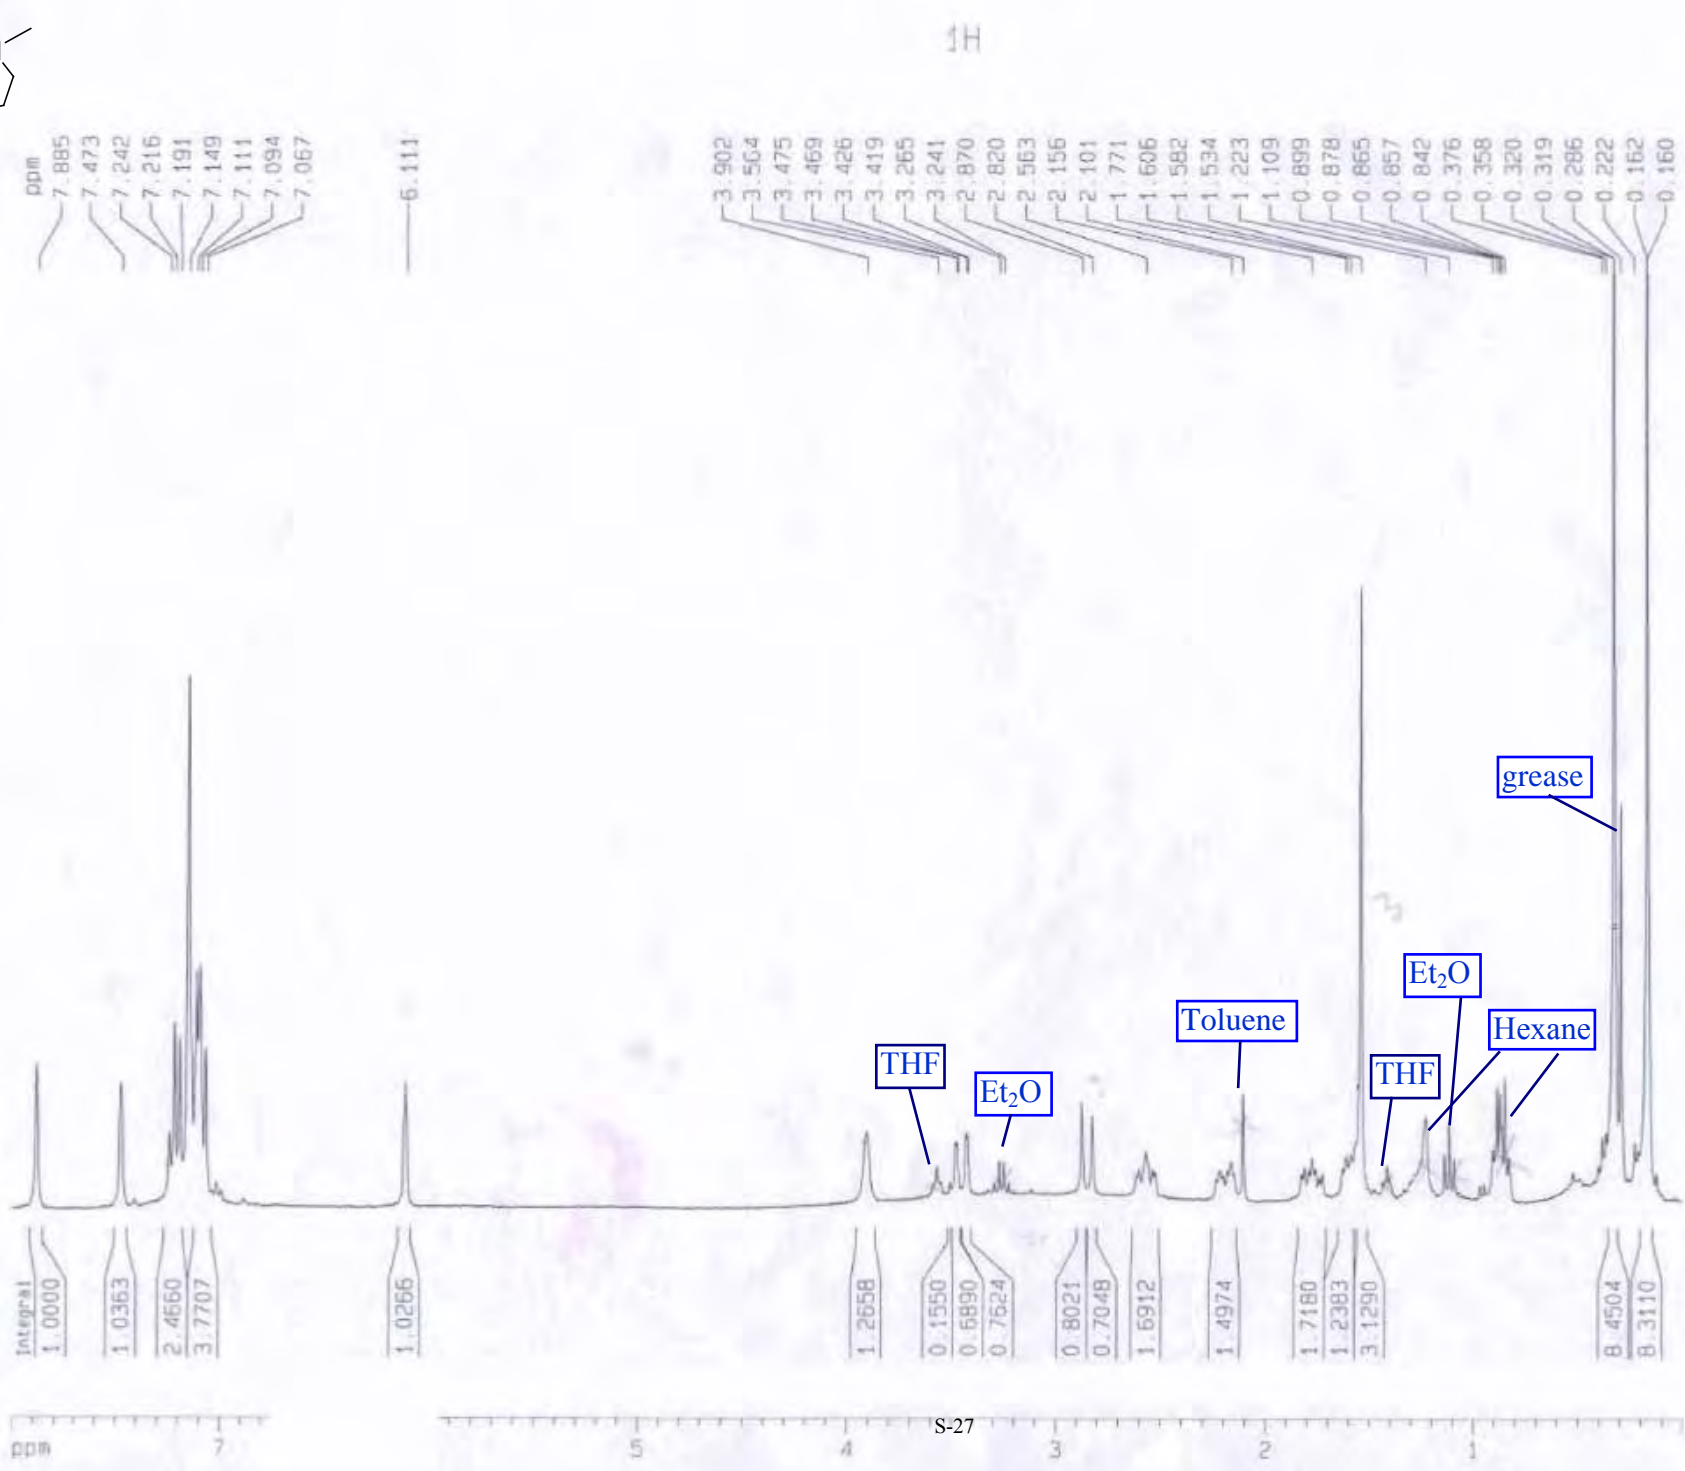

Current Data Parameters  
 NAME ldm196  
 EXPNO 3  
 PROCNO 1

F2 - Acquisition Parameters  
 Date\_ 20060606  
 Time 11.12  
 INSTRUM dpx300  
 PROBHD 5 mm BBO BB-1H  
 PULPROG zg  
 TD 32768  
 SOLVENT C606  
 NS 16  
 DS 0  
 SWH 8992.806 Hz  
 FIDRES 0.274439 Hz  
 AQ 1.8219508 sec  
 RG 256  
 DW 55.600 usec  
 DE 79.43 usec  
 TE 0.0 K  
 D1 1.00000000 sec  
 MCREST 0.00000000 sec  
 MCWAK 0.01500000 sec

\*\*\*\*\* CHANNEL f1 \*\*\*\*\*  
 NUC1 1H  
 P1 5.00 usec  
 PL1 -2.00 dB  
 SFO1 300.1312000 MHz

F2 - Processing parameters  
 SI 32768  
 SF 300.1300357 MHz  
 WDW EM  
 SSB 0  
 LB 0.30 Hz  
 GB 0  
 PC 1.00

10 NMR plot parameters  
 CX 22.00 cm  
 CY 30.00 cm  
 F1P 8.000 ppm  
 F1 2401.04 Hz  
 F2P 0.000 ppm  
 F2 0.00 Hz  
 PPMCM 0.36364 ppm/cm  
 HZCM 109.13619 Hz/cm

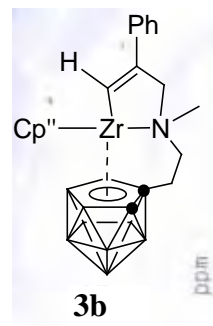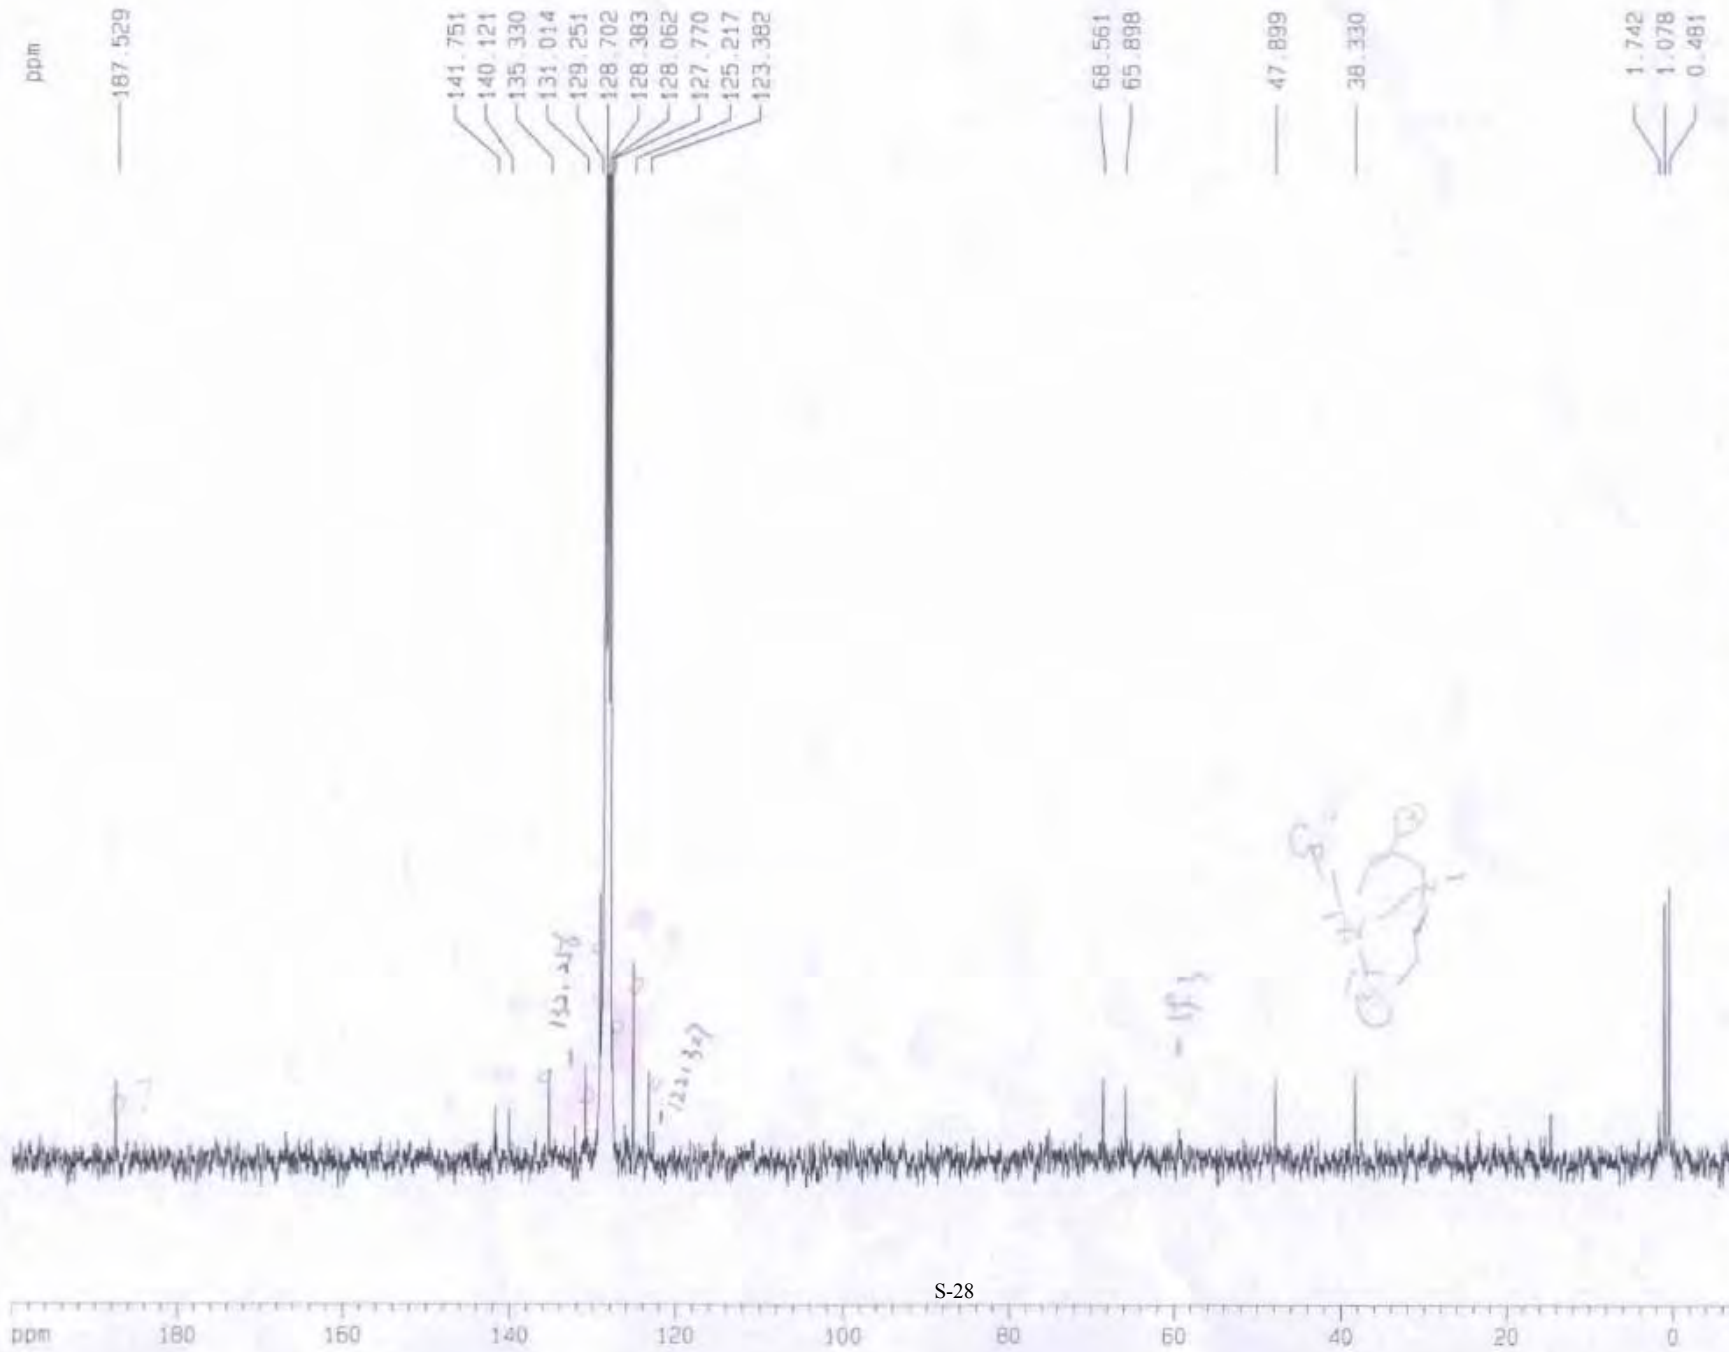

Current Data Parameters  
 NAME idm196-C  
 EXPNO 3  
 PROCNO 1

F2 - Acquisition Parameters  
 Date\_ 20060606  
 Time 11.16  
 INSTRUM dpq300  
 PROBHD 5 mm BBO BB-1H  
 PULPROG zgdc  
 TO 65536  
 SOLVENT C6D6  
 NS 1104  
 DS 0  
 SWH 22675.736 Hz  
 FIDRES 0.346004 Hz  
 AQ 1.4451188 sec  
 RG 8192  
 DN 22.050 usec  
 DE 6.00 usec  
 TE 0.0 K  
 D1 1.0000000 sec  
 d11 0.03000000 sec  
 MCREST 0.0000000 sec  
 MCWPK 0.01500000 sec

----- CHANNEL f1 -----  
 NUC1 13C  
 P1 3.00 usec  
 PL1 -6.00 dB  
 SFO1 75.4745111 MHz

----- CHANNEL f2 -----  
 CPDPRG2 waltz16  
 NUC2 1H  
 PCPD2 100.00 usec  
 PL2 120.00 dB  
 PL12 19.00 dB  
 SFO2 300.1315007 MHz

F2 - Processing parameters  
 SI 65536  
 SF 75.4677053 MHz  
 NDM EM  
 SSB 0  
 LB 3.00 Hz  
 GB 0  
 PC 1.40

1D NMR plot parameters  
 CX 23.00 cm  
 CY 60.00 cm  
 F1P 200.000 ppm  
 F1 15093.54 Hz  
 F2P -10.000 ppm  
 F2 -754.68 Hz  
 PPMCM 9.13043 ppm/cm  
 HZCM 689.05298 Hz/cm

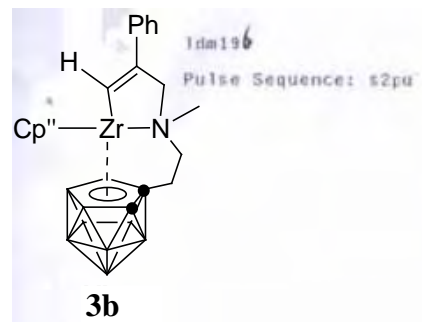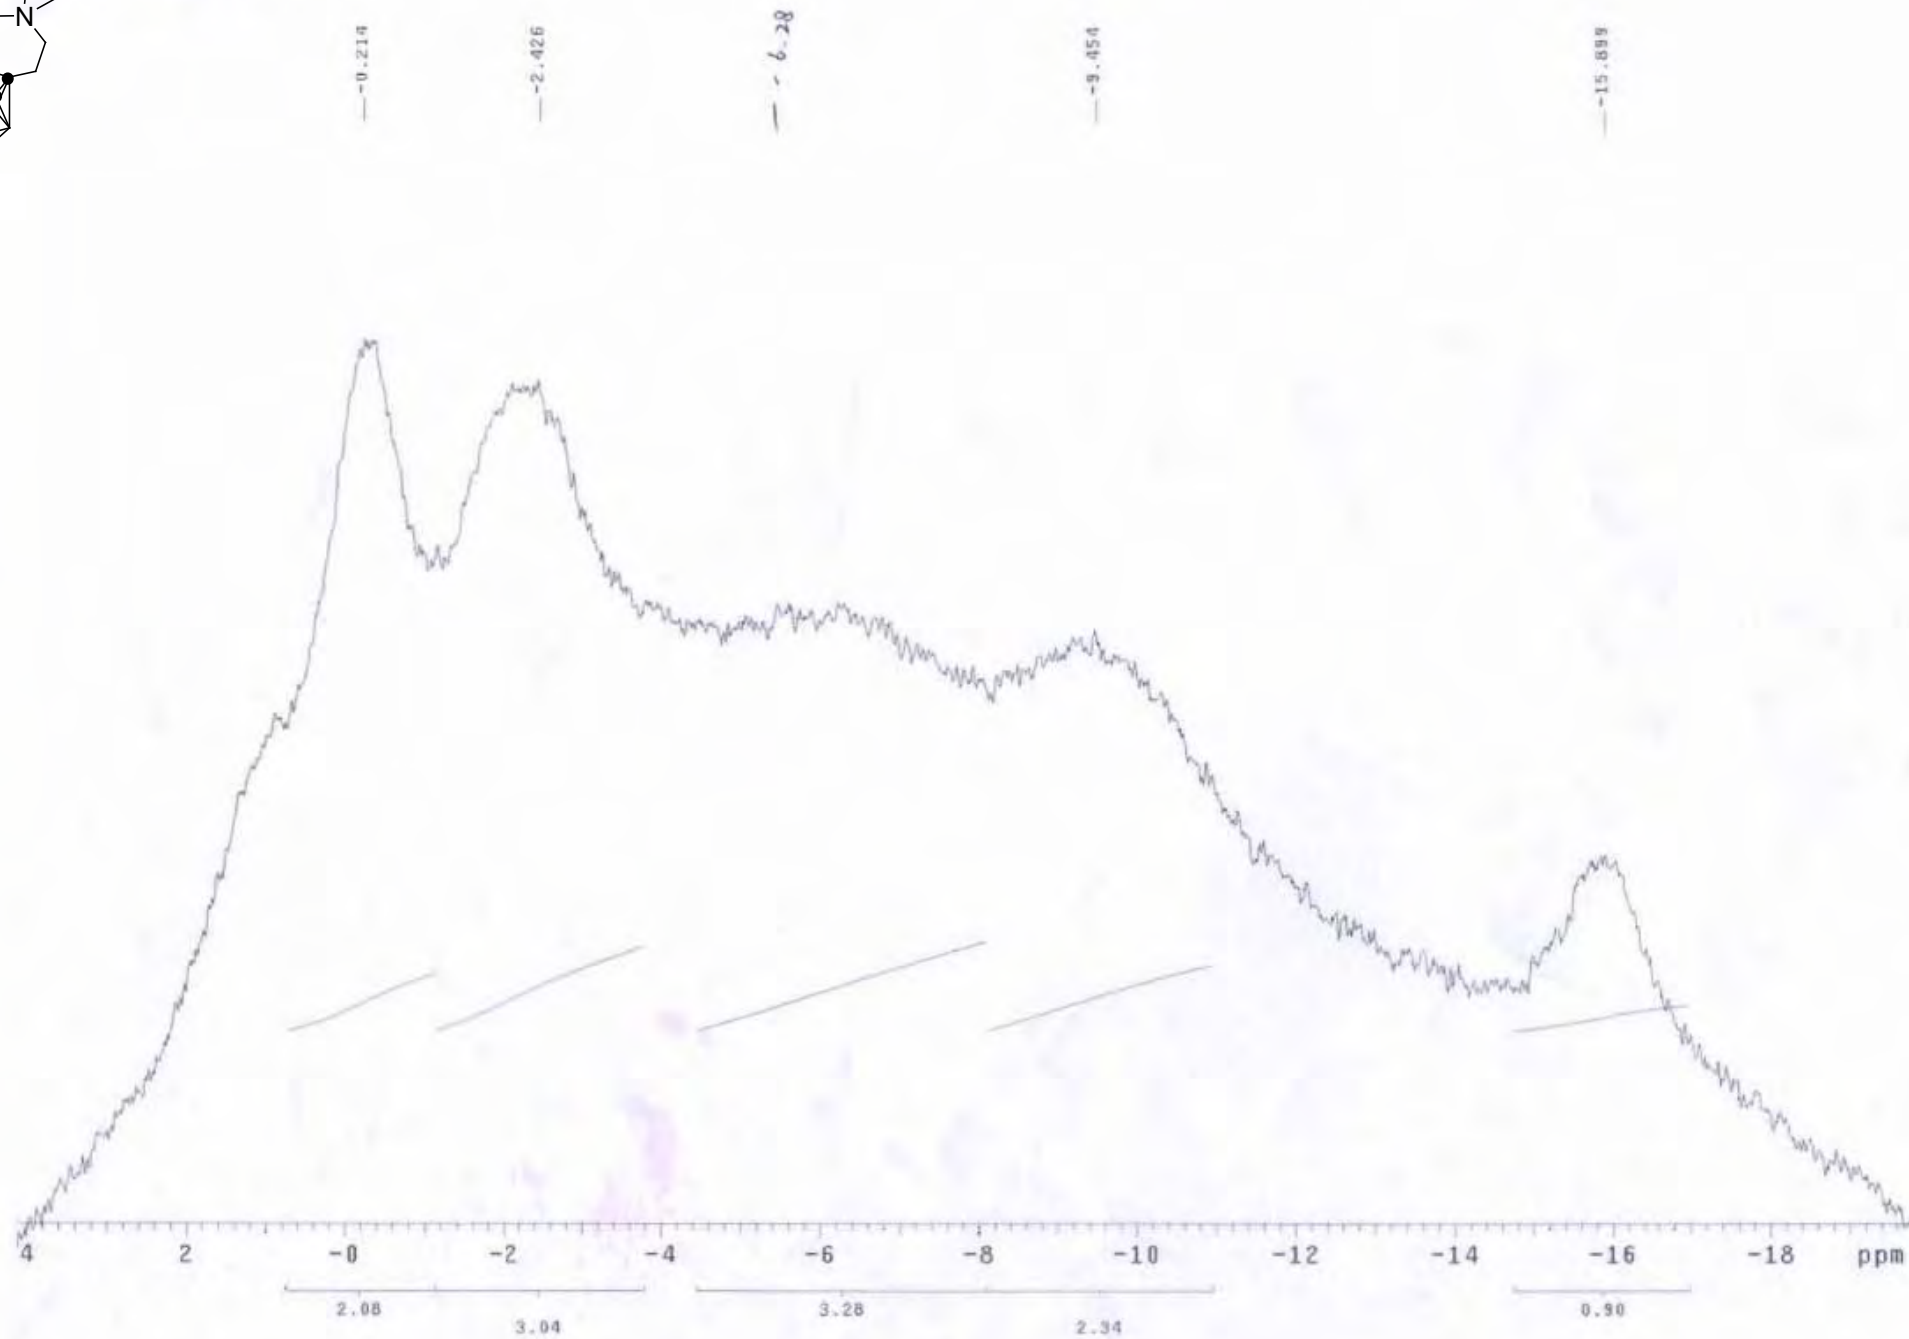

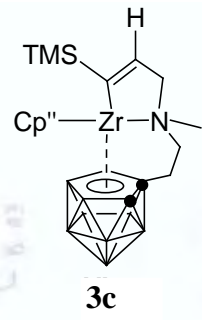

ppm  
 7.64  
 7.63  
 7.62  
 7.15  
 7.14  
 7.02  
 6.87  
 6.86  
 6.85  
 6.72  
 6.71  
 6.70  
 6.44  
 6.43

4.10  
 3.58  
 3.57  
 3.54  
 3.27  
 3.24  
 3.08  
 3.03  
 2.74  
 2.73  
 2.21  
 2.20  
 2.10  
 1.65  
 1.47  
 1.41  
 1.39  
 1.22  
 1.13  
 1.11  
 0.89  
 0.88  
 0.87  
 0.85  
 0.84  
 0.83  
 0.82  
 0.34  
 0.21  
 0.13  
 0.12  
 0.11  
 0.10  
 -0.04

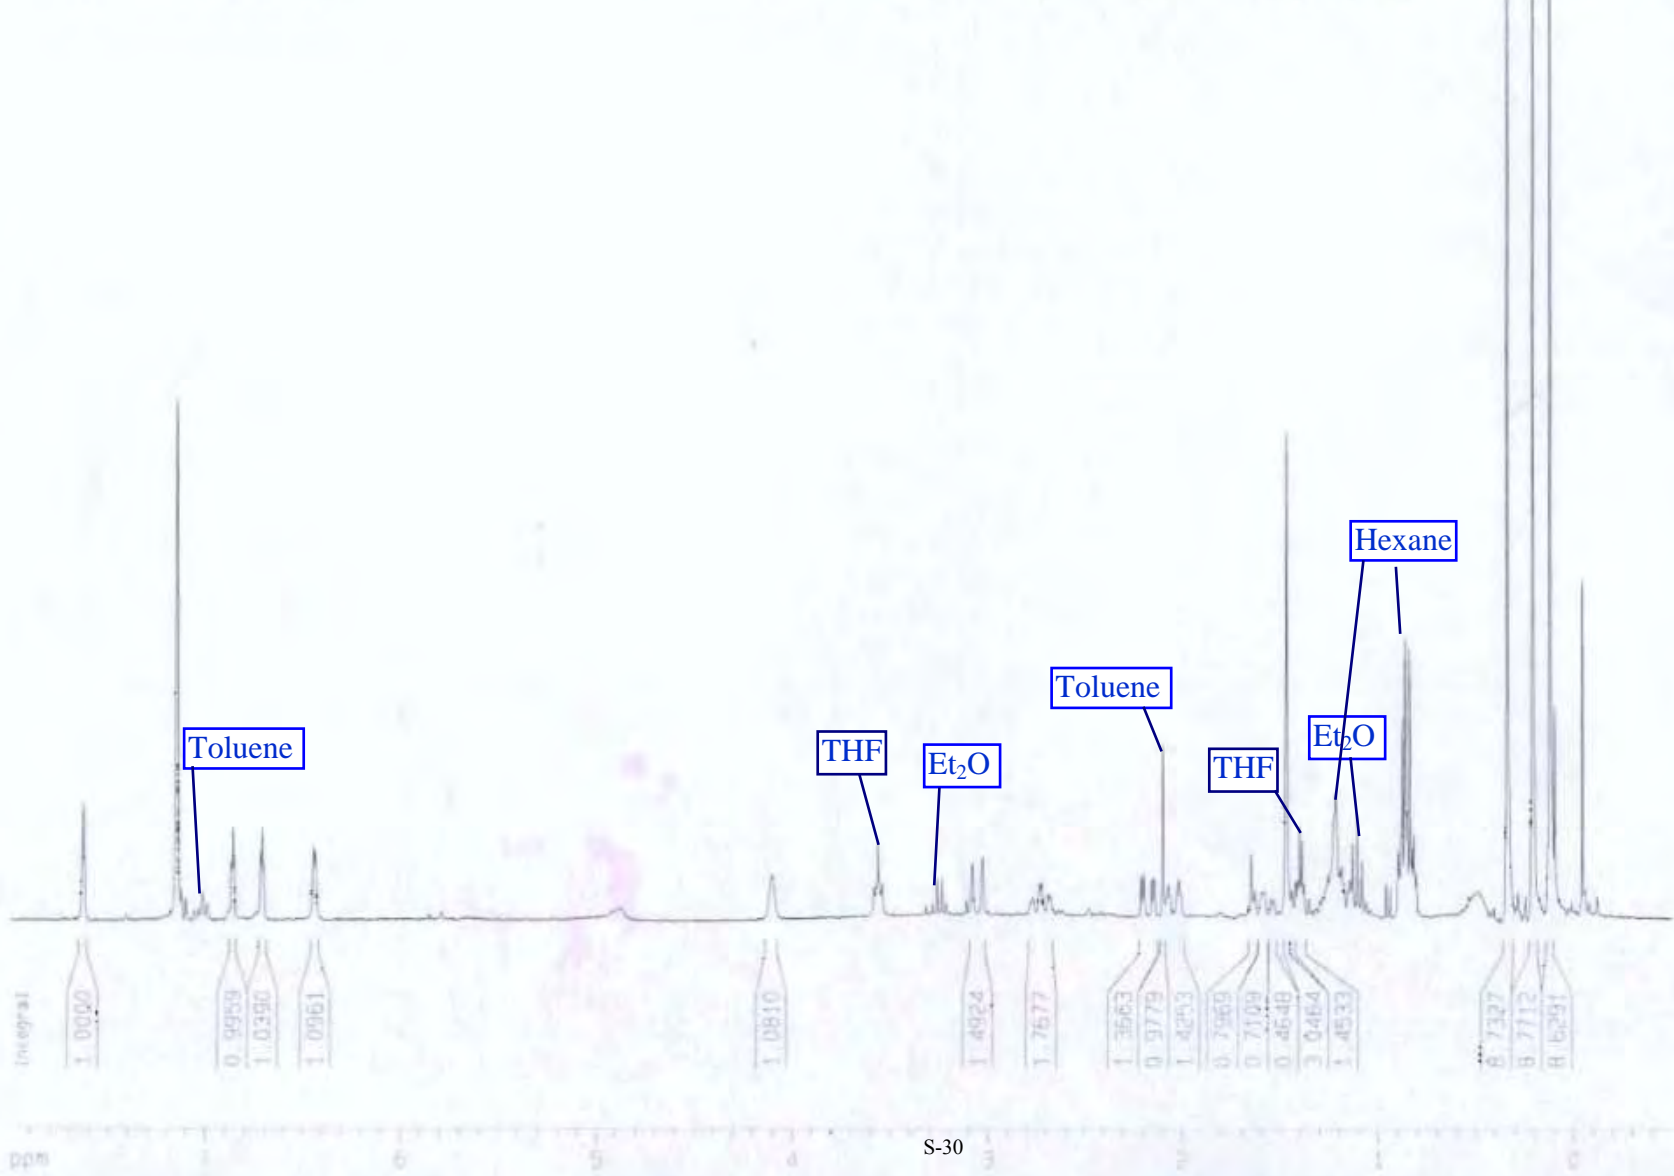

Current Data Parameters  
 NAME 10R218  
 EXPNO 3  
 PROCNO 1

F2 - Acquisition Parameters  
 Date\_ 20060808  
 Time 20.31  
 INSTRUM spect  
 PROBHD 5 mm BBO SB-1H  
 PULPROG zgpg30  
 TD 32768  
 SOLVENT C606  
 NS 8  
 DS 0  
 SWH 8930.806 Hz  
 FIDRES 0.274439 Hz  
 AQ 1.8219508 sec  
 RG 64  
 DW 55.600 usec  
 DE 79.43 usec  
 TE 0.0 K  
 DT 1.0000000 sec  
 MCREST 0.0000000 sec  
 MCWRR 0.0150000 sec

\*\*\*\*\* CHANNEL f1 \*\*\*\*\*  
 NUCl 1H  
 P1 5.00 usec  
 PL1 -2.00 dB  
 SFO1 300.1312090 MHz

F2 - Processing parameters  
 SI 32768  
 SF 300.1300352 MHz  
 WDW EM  
 SSB 0  
 LB 0.30 Hz  
 GB 0  
 PC 1.00

1D NMR plot parameters  
 CX 22.00 cm  
 CY 30.09 cm  
 FXP 8.000 ppm  
 F1 2401.04 Hz  
 F2 -0.500 ppm  
 F2 -150.08 Hz  
 SPM/CM 0.38626 ppm/cm  
 G/GCM 115.85833 Hz/cm

1dm218-C

Pulse Sequence: s2pu1

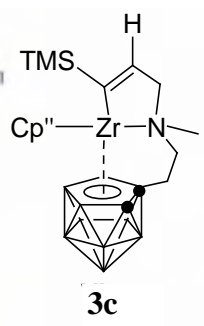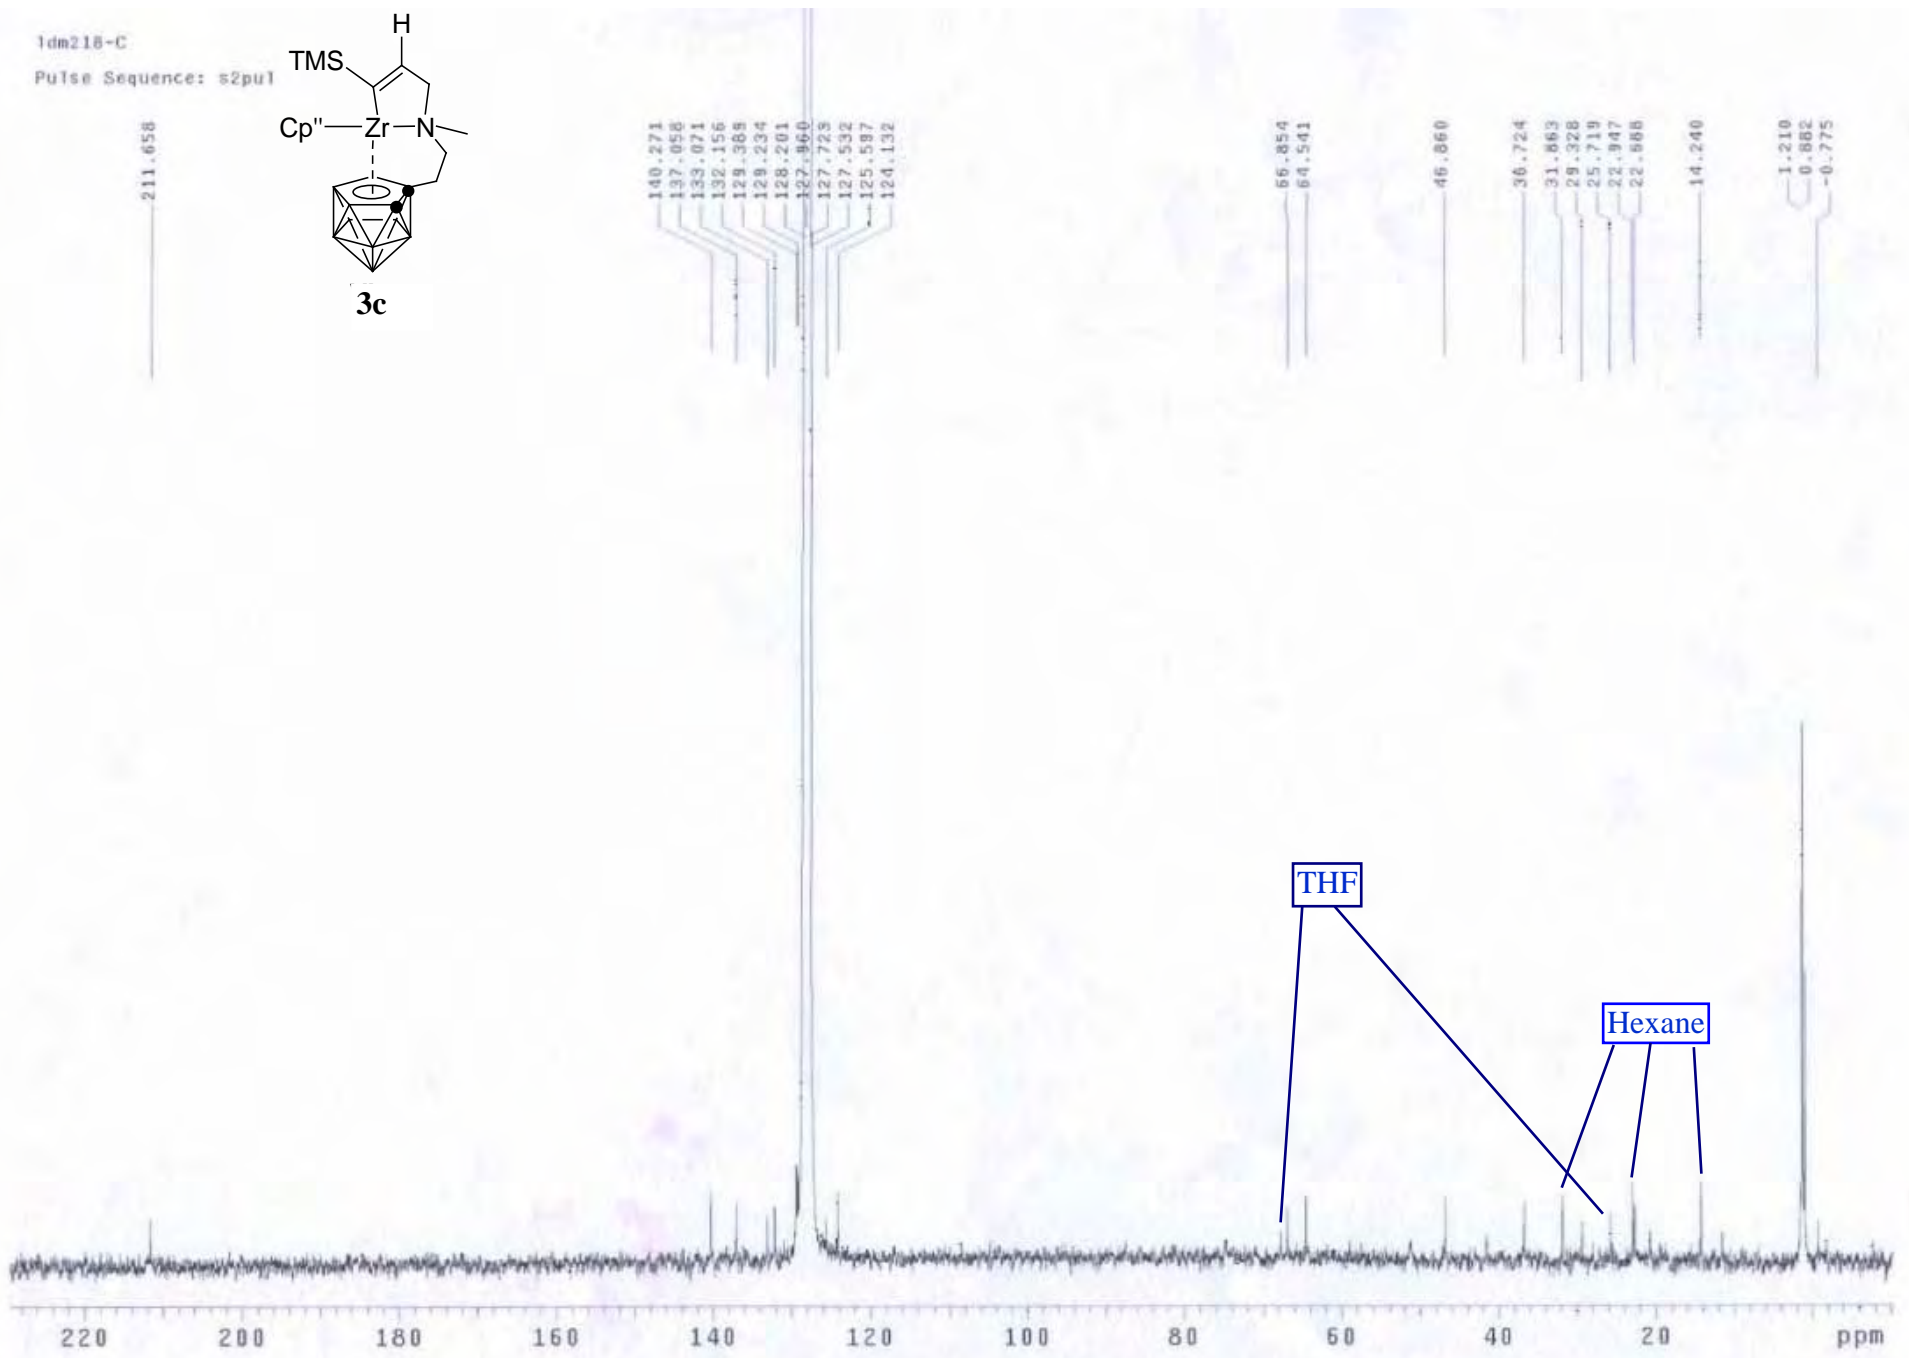

1dm210-B

Pulse Sequence: s2pu1

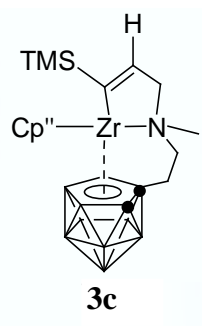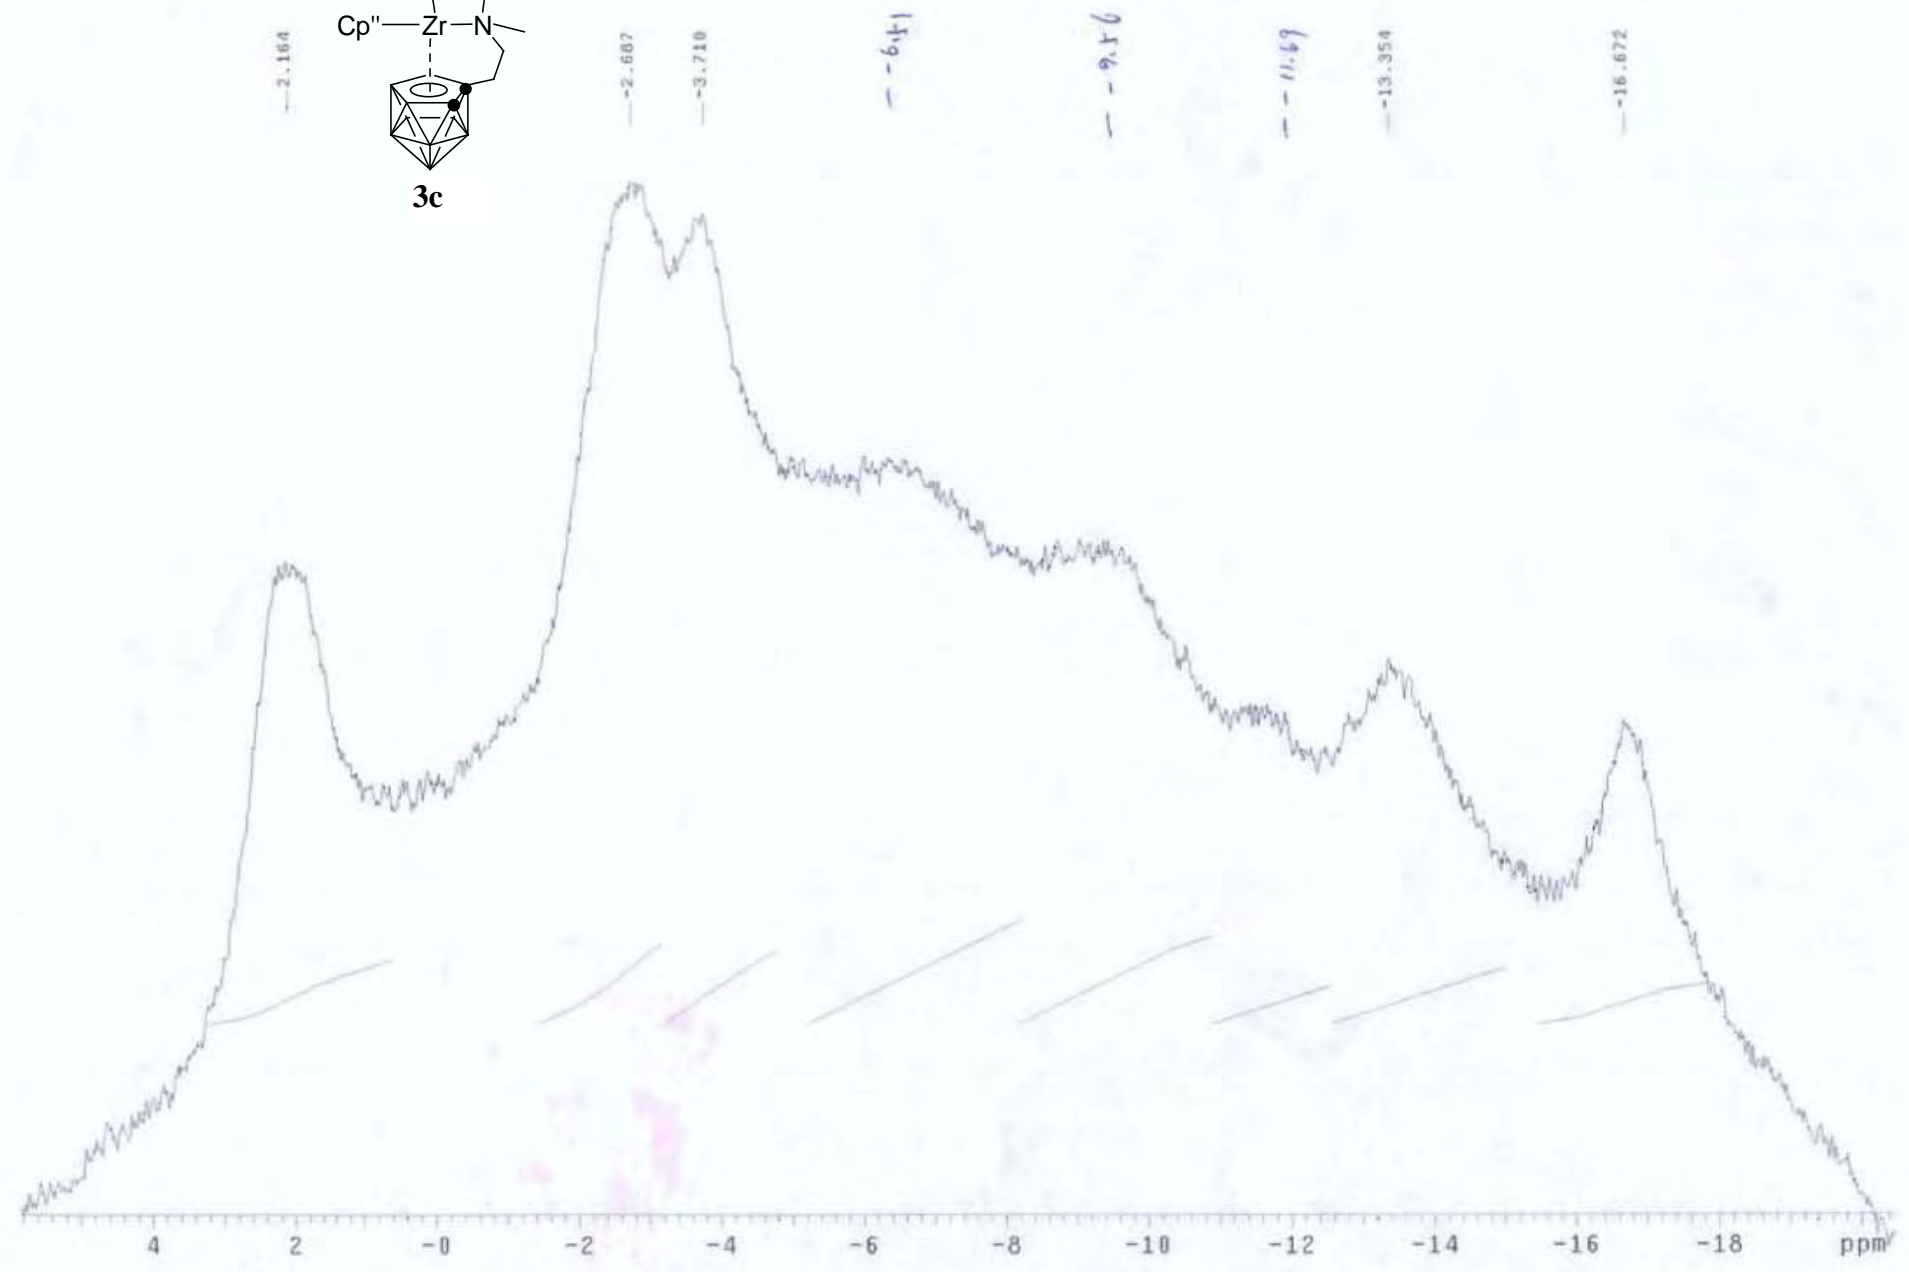





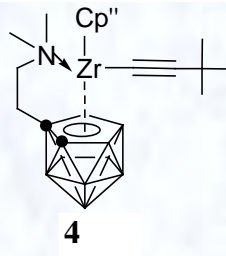

C13

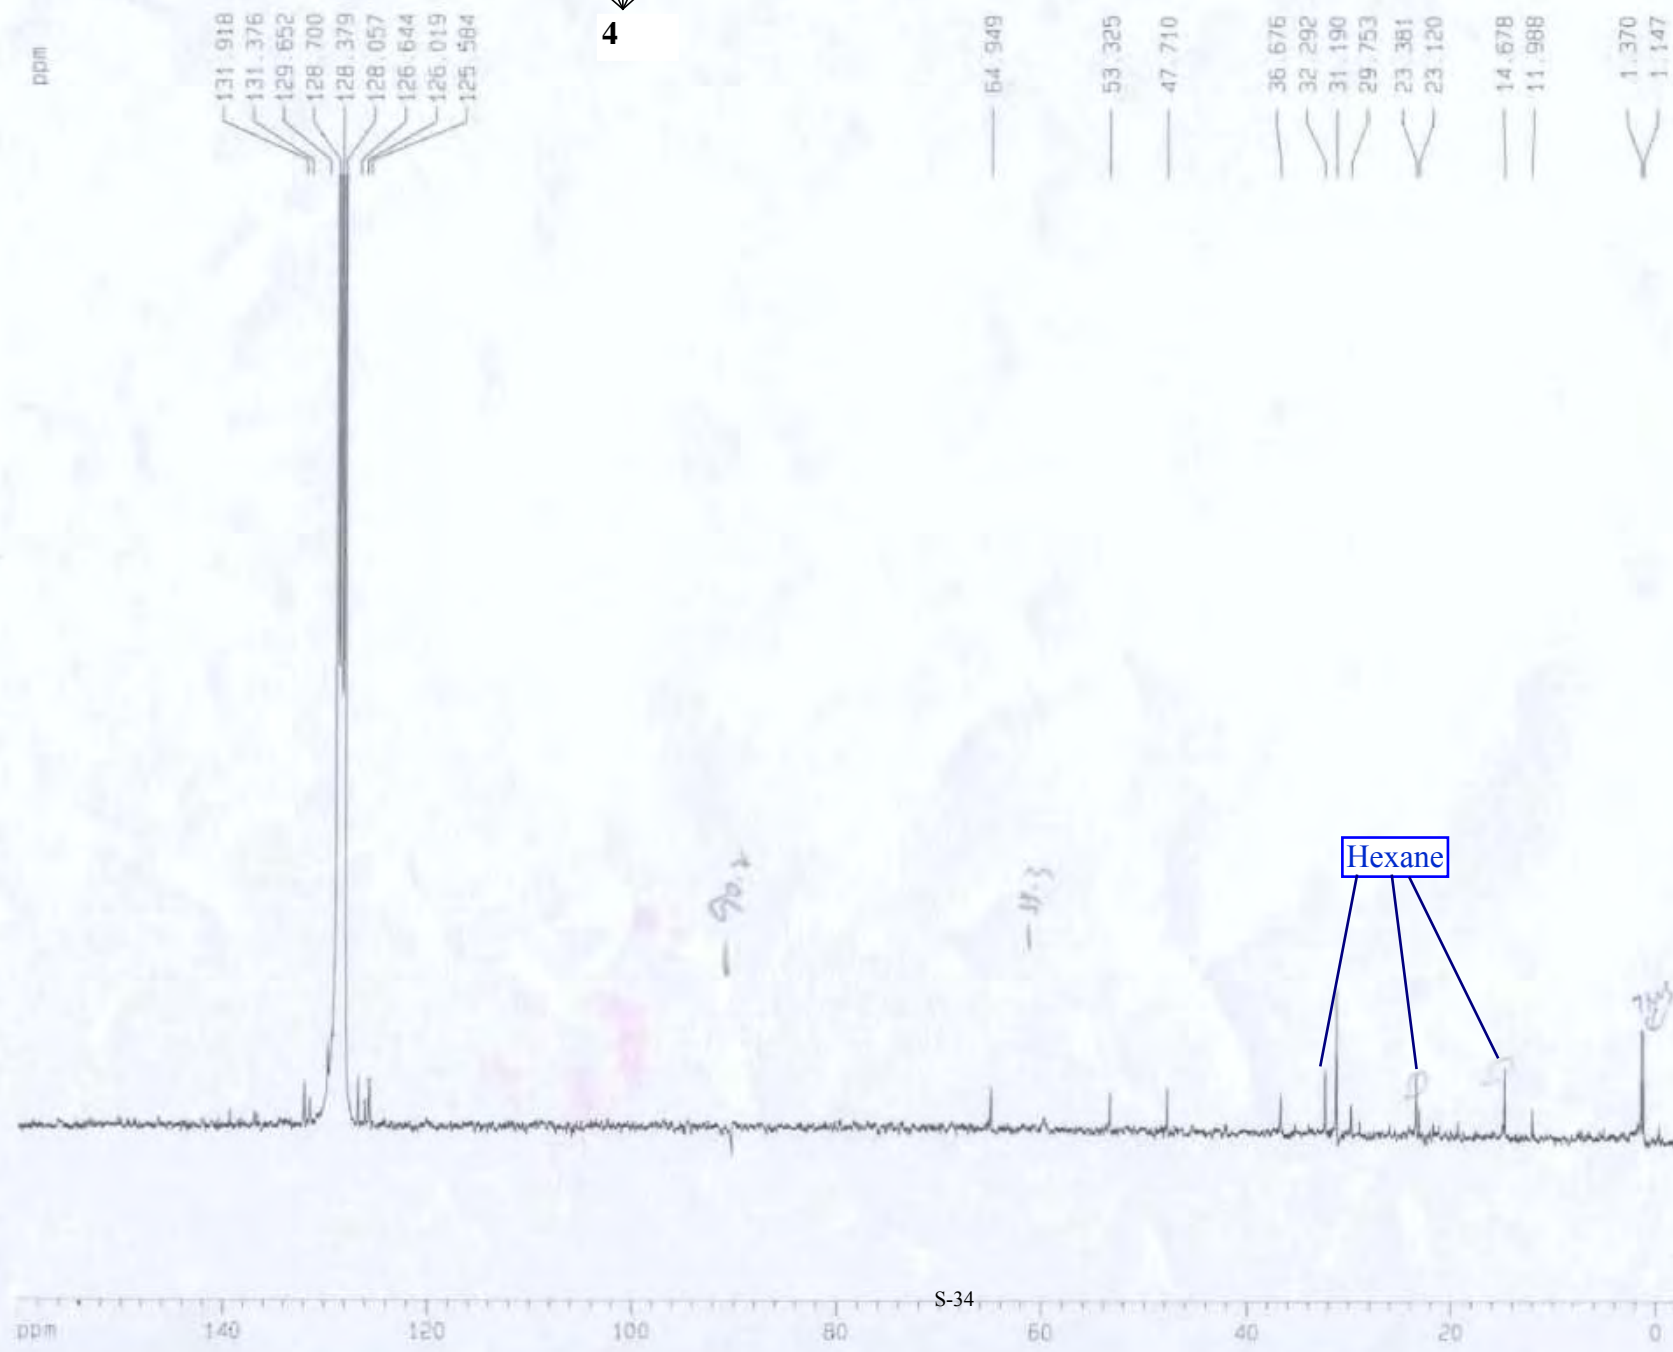

Current Data Parameters  
 NAME 1dn207-C  
 EXPNO 3  
 PROCNO 1

F2 - Acquisition Parameters  
 Date\_ 20050719  
 Time 8.58  
 INSTRUM gp300  
 PROBHD 5 mm BBO BB-1H  
 PULPROG zgpg  
 TD 65536  
 SOLVENT C606  
 NS 17009  
 DS 0  
 SWH 22675.736 Hz  
 FIDRES 0.348004 Hz  
 AQ 1.4451188 sec  
 RG 3649.1  
 DW 22.050 usec  
 DE 6.00 usec  
 TE 0.0 K  
 D1 1.00000000 sec  
 d11 0.03000000 sec  
 MCREST 0.00000000 sec  
 MCWPR 0.01500000 sec

----- CHANNEL f1 -----  
 NUC1 13C  
 P1 3.00 usec  
 PL1 -6.00 dB  
 SFO1 75.4745111 MHz

----- CHANNEL f2 -----  
 CPDPRG2 waltz16  
 NUC2 1H  
 PCPD2 100.00 usec  
 PL2 120.00 dB  
 PL12 19.00 dB  
 SFO2 300.1315007 MHz

F2 - Processing parameters  
 SI 65536  
 SF 75.4677053 MHz  
 WDW EM  
 SSB 0  
 LB 3.00 Hz  
 GB 0  
 PC 1.40

1D NMR plot parameters  
 CX 23.00 cm  
 CY 60.00 cm  
 F1P 160.000 ppm  
 F1 12074.83 Hz  
 F2P -10.000 ppm  
 F2 -754.68 Hz  
 PPMCM 7.39130 ppm/cm  
 HZCM 557.80475 Hz/cm

(dm 20)

STANDARD 1H OBSERVE

expi s2pu1

|             |            |            |          |            |           |
|-------------|------------|------------|----------|------------|-----------|
| date        | Aug 4 2006 | gfrq       | 236      | DEC. & JVT | 0.399.951 |
| solvent     | CDC13      | qn         |          |            | H1        |
| file        | exp        | spwr       | 40       |            |           |
| ACQUISITION |            |            |          |            |           |
| sfrq        | 128.317    | dm         | yyy      |            |           |
| tn          | 811        | dmm        | g        |            |           |
| at          | 0.655      | dmf        | 11765    |            |           |
| np          | 524288     | PROCESSING |          |            |           |
| sw          | 400000.0   | tb         | 3.00     |            |           |
| fb          | 220000     | wtfile     |          |            |           |
| bs          | 4          | proc       | ft       |            |           |
| tpwr        | 52         | fn         | not used |            |           |
| pw          | 5.0        |            |          |            |           |
| d1          | 1.000      | werr       |          |            |           |
| tof         | 0          | wexp       |          |            |           |
| nt          | 10000      | wbs        |          |            |           |
| ct          | 92         | wnt        |          |            |           |
| alock       | n          |            |          |            |           |
| gain        | 40         |            |          |            |           |

|         |          |
|---------|----------|
| FLAGS   |          |
| il      | n        |
| in      | n        |
| dp      | y        |
| DISPLAY |          |
| sp      | -2566.5  |
| wp      | 3335.6   |
| vs      | 322      |
| sc      | 0        |
| wc      | 250      |
| hzmm    | 13.34    |
| is      | 1927.73  |
| rfl     | 202835.9 |
| rfp     | 0        |
| th      | 7        |
| ins     | 1.000    |
| al      | ph       |

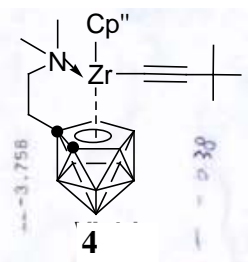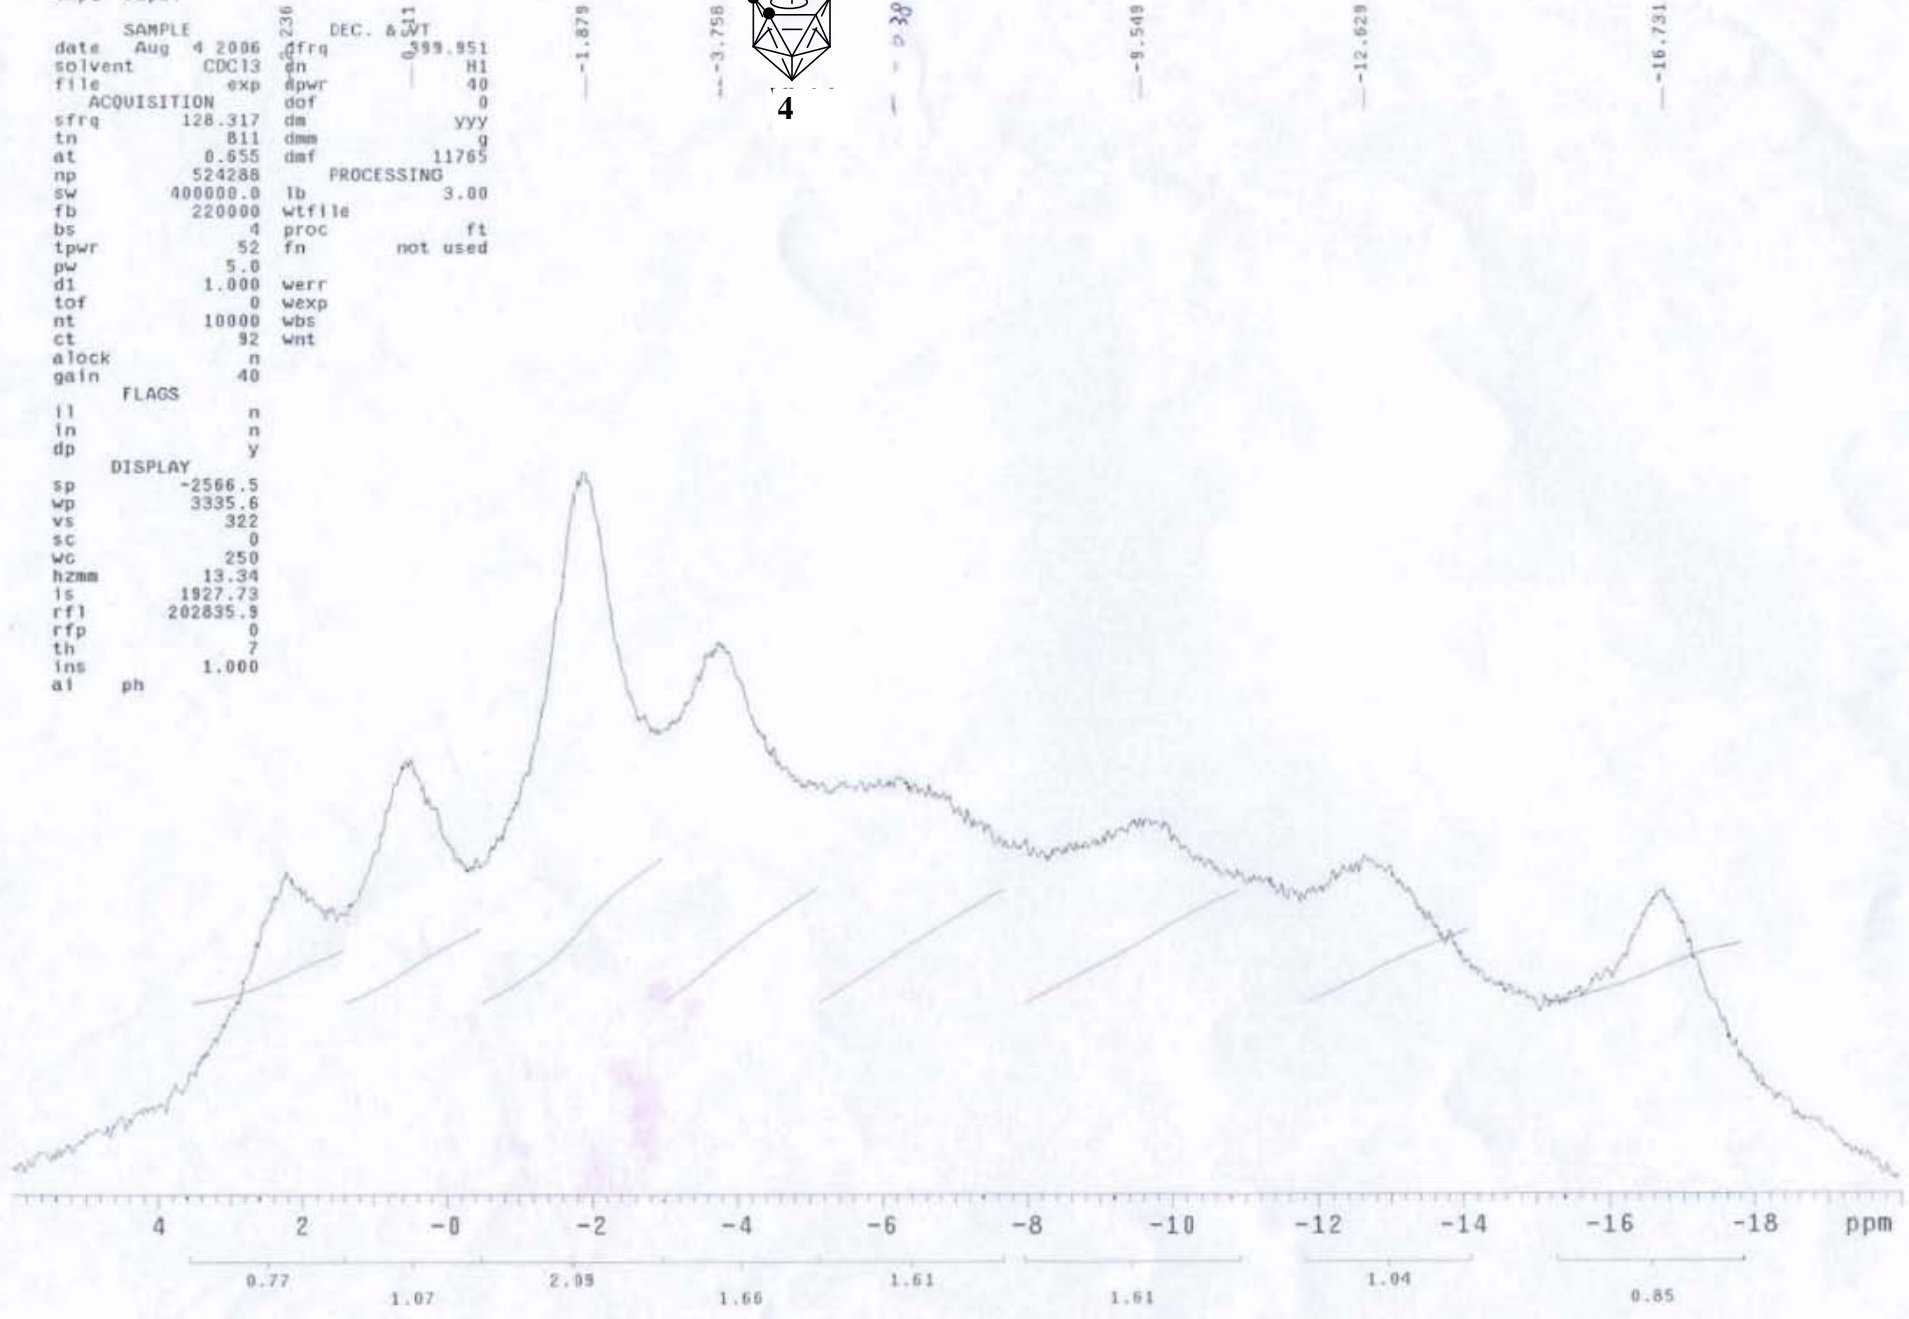

Supplement: c4qi00244j1.pdf [file c4qi00244j1.pdf]
